# Supplementary material for: N-Benzylhydroxylamine as a novel synthetic block in “C1N1” embedding reaction via α-C(sp3)–H activation strategy
Source: Royal Society of Chemistry journal article supplement (doi:10.1039/d4cc02105c), 2024-01-01

# Supporting Information

## ***N*-Benzylhydroxylamine as a novel synthetic block in "C1N1" embedding reaction *via* $\alpha$ -C(sp<sup>3</sup>)-H activation strategy**

Yong-Xing Tang,<sup>a</sup> You Zhou,<sup>a</sup> Hao-Xuan Wu,<sup>a</sup> Li-Sheng Wang,<sup>a</sup> Chun-Yan Wu,<sup>a</sup>  
Shi-Yi Zhuang<sup>\*,c</sup> and An-Xin Wu<sup>\*,a, b</sup>

<sup>a</sup>National Key Laboratory of Green Pesticide, International Joint Research Center for  
Intelligent Biosensor Technology and Health, College of Chemistry, Central China Normal  
University, Wuhan 430079, P. R. China

<sup>b</sup>State Key Laboratory of Applied Organic Chemistry, Lanzhou University, Lanzhou 730000,  
P. R. China

<sup>c</sup>Key Laboratory of Specialty Agri-product Quality and Hazard Controlling Technology of  
Zhejiang Province, College of Life Sciences, China Jiliang University, Hangzhou 310018, P.  
R. China

E-mail: Shi-Yi Zhuang: chemzsy@126.com  
An-Xin Wu: chwuax@mail.ccnu.edu.cn

### **Contents**

|                                                                                           |         |
|-------------------------------------------------------------------------------------------|---------|
| 1. General.....                                                                           | S2      |
| 2. Experimental procedures.....                                                           | S3-S6   |
| 3. Substrate scope of alkyl reactants.....                                                | S7      |
| 4. Mechanistic study.....                                                                 | S8-S12  |
| 5. The crystallographic data.....                                                         | S13-S16 |
| 6. Spectroscopic data.....                                                                | S17-S36 |
| 7. Copies of <sup>1</sup> H NMR, <sup>13</sup> C NMR and <sup>19</sup> F NMR spectra..... | S37-S97 |

## 1. General

All of the substrates and reagents were commercially available and used without further purification. TLC analysis was performed using pre-coated glass plates. Flash column chromatography was performed on silica gel (200–300 mesh).  $^1\text{H}$  NMR spectra were determined at 25 °C on a Varian Mercury 400 MHz spectrometer. Chemical shifts were provided in ppm relative to the internal standard of tetramethylsilane (TMS).  $^{13}\text{C}$  spectra were recorded in  $\text{CDCl}_3$  on 100 MHz NMR spectrometers and resonances ( $\delta$ ) in ppm. The data is being reported as s = singlet, d = doublet, t = triplet, m = multiplet or unresolved coupling constant(s) in Hz, integration. HRMS were obtained on Thermo Scientific Q Exactive equipped with an electron spray ionization source. Melting points were determined by using an electrothermal capillary melting point apparatus and not corrected. The X-ray crystal-structures were obtained on a Bruker APEX DUO CCD system.

## 2. Experimental procedures

### 2.1 Optimization of the reaction conditions <sup>a,b</sup>

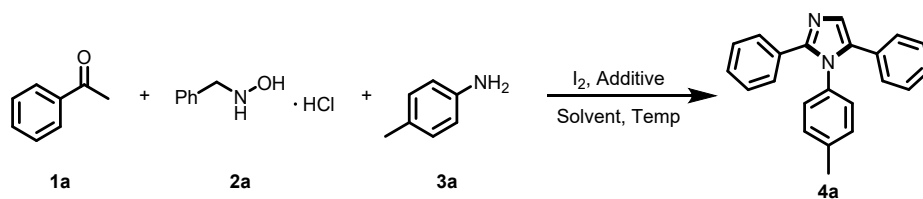

| Entry     | <b>1a:2a:3a</b> | I <sub>2</sub> (equiv.) | Additive (equiv.)                     | solvent          | Temp (°C) | Yield <sup>b</sup> (%) |
|-----------|-----------------|-------------------------|---------------------------------------|------------------|-----------|------------------------|
| 1         | 1:1:1           | 1.6                     |                                       | DMSO             | 100       | 41                     |
| 2         | 1:1:1           | 1.6                     |                                       | DMSO             | 120       | 29                     |
|           | 1:1:1           | 1.6                     |                                       | DMSO             | 140       | 25                     |
| 3         | 1:1:1           | 1.6                     |                                       | DMSO             | 80        | 50                     |
| 4         | 1:1:1           | 1.6                     |                                       | DMSO             | 60        | 63                     |
| 5         | 1:1:1           | 1.6                     |                                       | DMSO             | 40        | 26                     |
| 6         | 1:1:1           | 1.6                     | TFA (1.0)                             | DMSO             | 60        | 46                     |
| 7         | 1:1:1           | 1.6                     | TfOH (1.0)                            | DMSO             | 60        | 40                     |
| 8         | 1:1:1           | 1.6                     | HI (1.0)                              | DMSO             | 60        | 31                     |
| 9         | 1:1:1           | 1.6                     | TsOH (1.0)                            | DMSO             | 60        | 37                     |
| 10        | 1:1:1           | 1.6                     | PhCOOH (1.0)                          | DMSO             | 60        | 49                     |
| 11        | 1:1:1           | 1.6                     | ZnCl <sub>2</sub> (1.0)               | DMSO             | 60        | 28                     |
| 12        | 1:1:1           | 1.6                     | FeCl <sub>3</sub> (1.0)               | DMSO             | 60        | 43                     |
| 13        | 1:1:1           | 1.6                     | CuBr <sub>2</sub> (1.0)               | DMSO             | 60        | trace                  |
| 14        | 1:1:1           | 1.6                     | Morpholine (1.0)                      | DMSO             | 60        | 50                     |
| 15        | 1:1:1           | 1.6                     | DABCO (1.0)                           | DMSO             | 60        | 46                     |
| 16        | 1:1:1           | 1.6                     | Cs <sub>2</sub> CO <sub>3</sub> (1.0) | DMSO             | 60        | 33                     |
| 17        | 1:1:1           | 1.6                     | NaHCO <sub>3</sub> (1.0)              | DMSO             | 60        | 47                     |
| 18        | 2:1:1           | 1.6                     |                                       | DMSO             | 60        | 56                     |
| 19        | 1:2:1           | 1.6                     |                                       | DMSO             | 60        | 31                     |
| 20        | 1:1:2           | 1.6                     |                                       | DMSO             | 60        | 43                     |
| <b>21</b> | <b>1:2:2</b>    | <b>1.6</b>              |                                       | <b>DMSO</b>      | <b>60</b> | <b>70</b>              |
| 22        | 1:3:2           | 1.6                     |                                       | DMSO             | 60        | 54                     |
| 23        | 1:2:2           | 0                       |                                       | DMSO             | 60        | ND                     |
| 24        | 1:2:2           | 0.8                     |                                       | DMSO             | 60        | 59                     |
| 25        | 1:2:2           | 1.2                     |                                       | DMSO             | 60        | 64                     |
| 26        | 1:2:2           | 2.0                     |                                       | DMSO             | 60        | 57                     |
| 27        | 1:2:2           | 1.6                     |                                       | THF              | 60        | ND                     |
| 28        | 1:2:2           | 1.6                     |                                       | MeCN             | 60        | ND                     |
| 29        | 1:2:2           | 1.6                     |                                       | EtOH             | 60        | ND                     |
| 30        | 1:2:2           | 1.6                     |                                       | H <sub>2</sub> O | 60        | ND                     |
| 31        | 1:2:2           | 1.6                     |                                       | DMF              | 60        | ND                     |
| 32        | 1:2:2           | 1.6                     |                                       | 1,4-Dioxane      | 60        | ND                     |
| 33        | 1:2:2           | 1.6                     |                                       | DCM              | 60        | ND                     |
| 34        | 1:2:2           | 1.6                     |                                       | DCE              | 60        | ND                     |

<sup>a</sup>Reaction conditions: **1a** (0.5 mmol, 1.0 equiv.), **2a** (equiv.), **3a** (equiv.), I<sub>2</sub> (equiv.), additive (equiv.) and indicated temperature heated in solvent (3mL) for 8 h. <sup>b</sup>Products were obtained in isolated yields.

## 2.2 General procedure for the synthesis of 4 or 5a-5p (4a as an example)

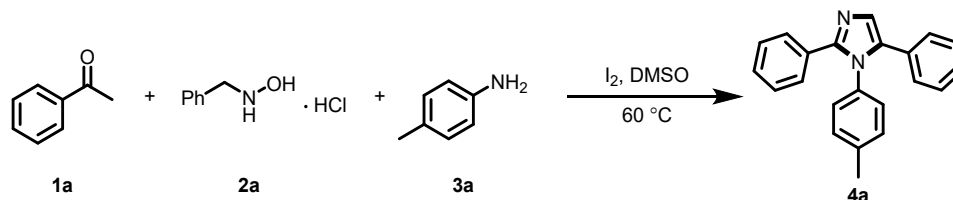

A tube equipped with a magnetic stirring bar was charged with acetophenone (**1a**) (60.0 mg, 0.5 mmol), *N*-benzylhydroxylamine hydrochloride (**2a**) (160.0 mg, 1.0 mmol), *p*-toluidine (**3a**) (107.0 mg, 1.0 mmol), and iodine (203.0 mg, 0.8 mmol) at room temperature, and DMSO (3 mL) was added. The resulting mixture was stirred at 60 °C for 8 h and monitored by TLC. After the reaction completed, the mixture was quenched with saturation Na<sub>2</sub>S<sub>2</sub>O<sub>3</sub> solution (50 mL), extracted with EtOAc (3 × 50 mL). The combined organic layers were washed with brine, dried over anhydrous Na<sub>2</sub>SO<sub>4</sub> and concentrated under reduced pressure. The residue was purified by column chromatography on silica gel (petroleum ether/EtOAc = 15:1) to yield the desired product **4a** (108.6 mg, yield 70%) as light yellow solid.

## 2.3 General procedure for the synthesis of 5q

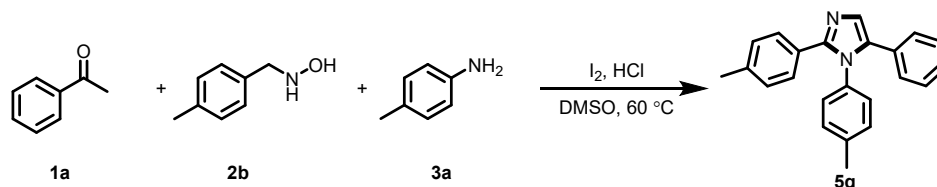

A tube equipped with a magnetic stirring bar was charged with acetophenone (**1a**) (60.0 mg, 0.5 mmol), *N*-(4-methylbenzyl)hydroxylamine (**2b**) (137.0 mg, 1.0 mmol), *p*-toluidine (**3a**) (107.0 mg, 1.0 mmol), and iodine (203.0 mg, 0.8 mmol) at room temperature, and DMSO (3 mL) was added, followed by the dropwise addition of a 12 N HCl (36 mg, 1.0 mmol, 2.0 equiv) at 60 °C. The resulting mixture was stirred at 60 °C for 8 h and monitored by TLC. After the reaction completed, the mixture was quenched with saturation Na<sub>2</sub>S<sub>2</sub>O<sub>3</sub> solution (50 mL), extracted with EtOAc (3 × 50 mL). The combined organic layers were washed with brine, dried over anhydrous Na<sub>2</sub>SO<sub>4</sub> and concentrated under reduced pressure. The residue was purified by column chromatography on silica gel (petroleum ether/EtOAc = 8:1) to yield the desired product **5q** (76.2 mg, yield 47%) as light

yellow solid.

## 2.4 General procedure for the synthesis of 4a in a 10.0 mmol scale

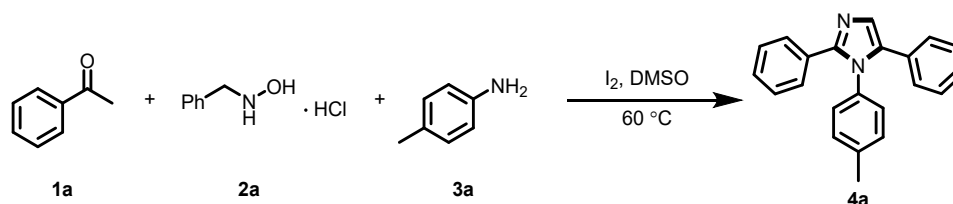

A 100 mL round-bottomed flask was charged with acetophenone (**1a**) (1.20 g, 10.0 mmol), *N*-Benzylhydroxylamine hydrochloride (**2a**) (3.20 g, 20.0 mmol), *p*-toluidine (**3a**) (2.14 g, 20.0 mmol), and iodine (4.06 g, 16.0 mmol) at room temperature, and DMSO (50 mL) was added. The resulting mixture was stirred at 60 °C for 8 h in oil bath and monitored by TLC. After the reaction completed, the mixture was quenched with saturation Na<sub>2</sub>S<sub>2</sub>O<sub>3</sub> solution (200 mL), extracted with EtOAc (3 × 200 mL). The combined organic layers were washed with brine, dried over anhydrous Na<sub>2</sub>SO<sub>4</sub> and concentrated under reduced pressure. The residue was purified by column chromatography on silica gel (petroleum ether/EtOAc = 15:1) to yield the desired product **4a** (1.98 g, yield 64%) as light yellow solid.

## 2.5 Preparation of hydroxylamines from aldehydes<sup>[1]</sup>

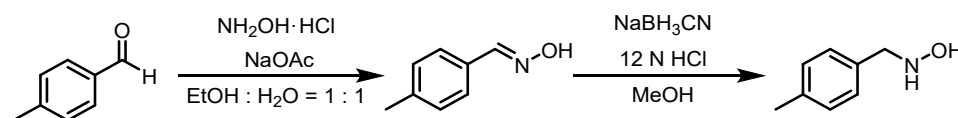

To a solution of an aldehyde (1.2g, 10 mmol, 1.0 equiv.) and hydroxylammonium chloride (0.83 g, 12 mmol, 1.2 equiv.) in ethanol-water (10 mL:10 mL) was added sodium acetate (1.64 g, 20 mmol, 2.0 equiv.). The solution was stirred until the aldehyde was fully consumed. The solvent was removed under vacuum, and the residue was separated between water and EtOAc. The aqueous layer was washed with EtOAc (2× 50 mL). The combined organic layers were dried over anhydrous Na<sub>2</sub>SO<sub>4</sub>, filtered and concentrated to afford oxime that was used for the next step without further purification. The oxime obtained in the previous step was suspended in MeOH (20 mL), to which sodium cyanoborohydride (0.75g, 12 mmol, 1.2 equiv.) was added, followed by the dropwise addition of a 12 N HCl (8.3 mL, 100 mmol, 10.0 equiv.) at 0 °C. After stirring for 4 h at room temperature, the reaction mixture was poured into water and the whole mixture was neutralized with KOH pellet at 0 °C. Then, extractive work-up was performed with EtOAc, and the organic extracts

were washed with brine, dried over anhydrous Na<sub>2</sub>SO<sub>4</sub>, and concentrated. The hydroxylamine could be used directly without further purification.

## 2.6 Procedure for the synthesis of **6** <sup>[2]</sup>

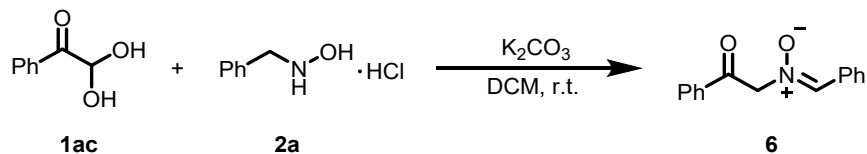

To a stirred solution of *N*-Benzylhydroxylamine hydrochloride **2a** (319 mg, 1.0 equiv., 2 mmol) and K<sub>2</sub>CO<sub>3</sub> (828 mg, 3.0 equiv., 6 mmol) in DCM was added phenylglyoxal monohydrate **1ac** (334mg, 1.1 equiv., 2.2 mmol) at room temperature. The mixture was stirred overnight, and then filtrated on celite, evaporation under vacuum. The residue was then crystallized from dichloromethane and petroleum ether, to give the product **6** (454.1 mg, yield 95%) as orange solid.

### 3. Substrate scope of alkyl reactants

We employed some alkyl reactants under the optimized reaction conditions, to our disappointment, the aliphatic ketones, alkyl hydroxylamine, and aliphatic amines were not compatible with this transformation, and the trace desired products only could be detected in the crude reaction extract by HRMS analysis.

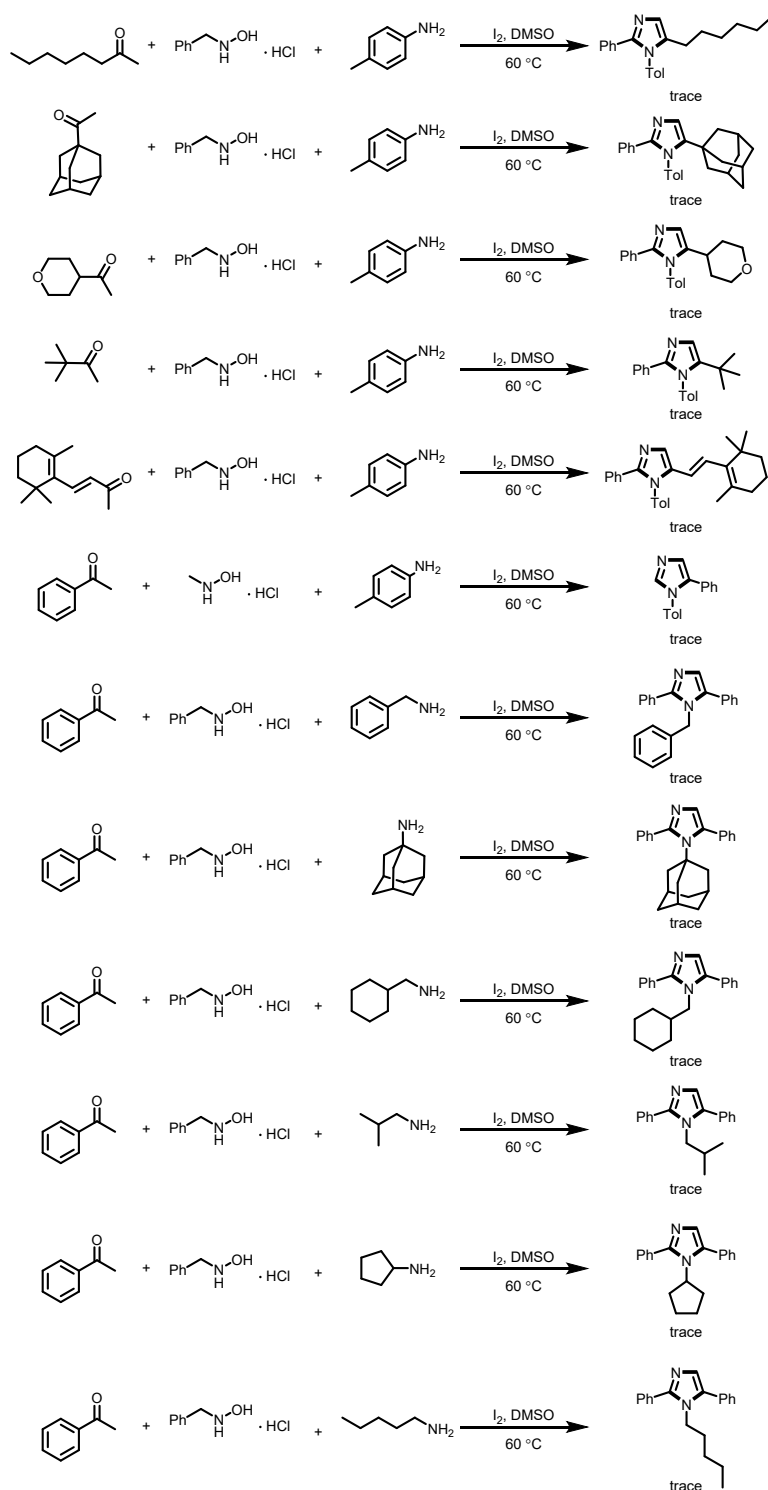

## 4. Mechanistic study

### 4.1 Isotope labeling experiment

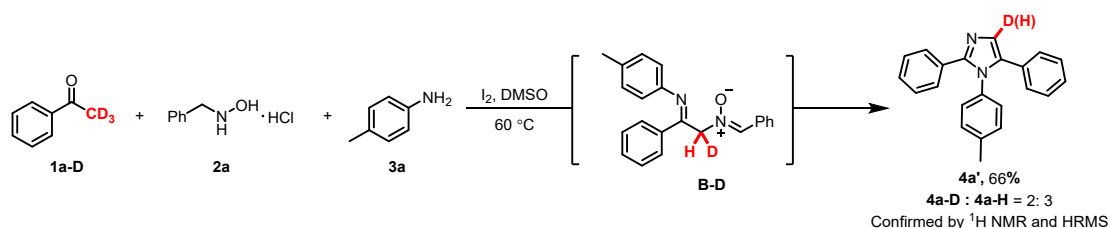

A tube equipped with a magnetic stirring bar was charged with  $\text{CD}_3$ -labeled acetophenone (**1a-D**) (62.0 mg, 0.5 mmol), *N*-Benzylhydroxylamine hydrochloride (**2a**) (160.0 mg, 1.0 mmol), *p*-toluidine (**3a**) (107.0 mg, 1.0 mmol) and iodine (203.0 mg, 0.8 mmol) at room temperature, and DMSO (3 mL) was added. The resulting mixture was stirred at 60  $^{\circ}\text{C}$  for 8 h and monitored by TLC. After the reaction completed, the mixture was quenched with saturation  $\text{Na}_2\text{S}_2\text{O}_3$  solution (50 mL), extracted with EtOAc ( $3 \times 50$  mL). The combined organic layers were washed with brine, dried over anhydrous  $\text{Na}_2\text{SO}_4$  and concentrated under reduced pressure. The residue was purified by column chromatography on silica gel (petroleum ether/EtOAc = 15:1) to yield the desired product (102.6 mg, yield 66%) as yellow solid.

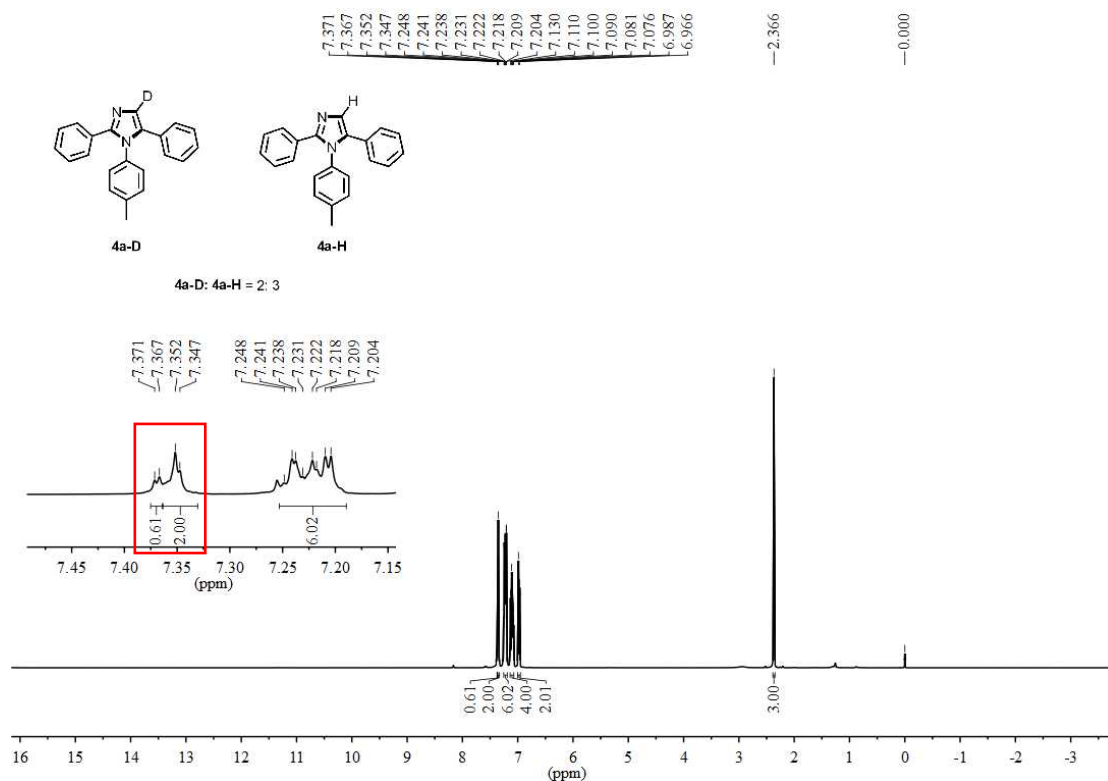

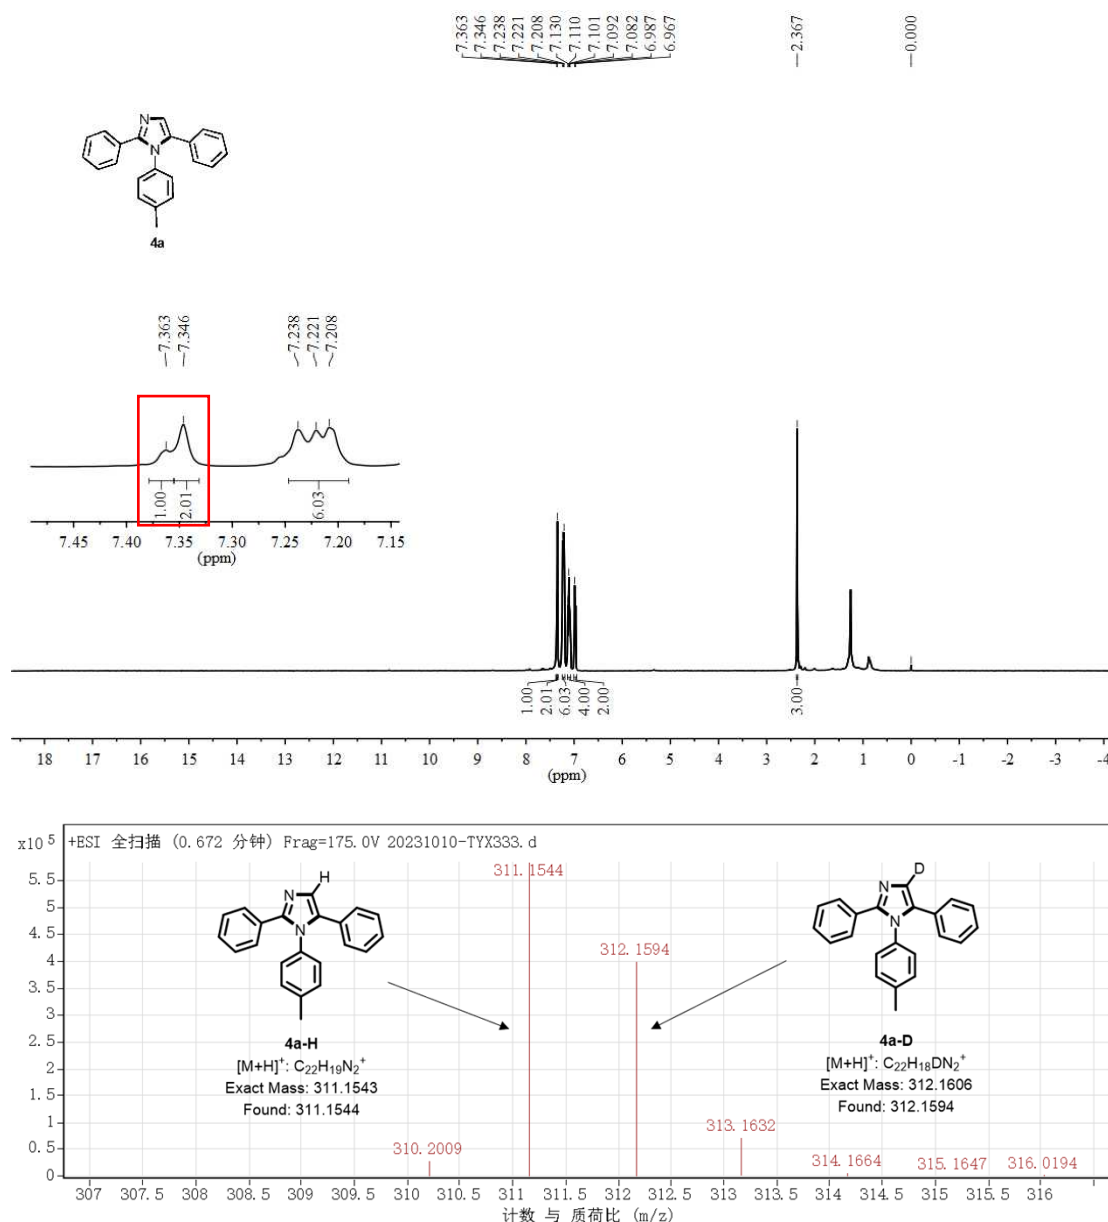

## 4.2 The mechanism of HRMS

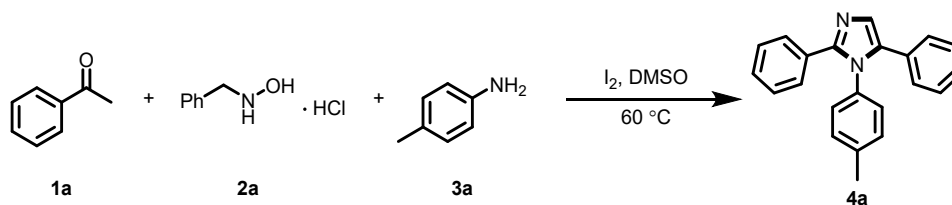

A tube equipped with a magnetic stirring bar was charged with acetophenone (**1a**) (60.0 mg, 0.5 mmol), *N*-Benzylhydroxylamine hydrochloride (**2a**) (160.0 mg, 1.0 mmol), *p*-toluidine (**3a**) (107.0 mg, 1.0 mmol) and iodine (203.0 mg, 0.8 mmol) at room temperature, and DMSO (3 mL) was added. The resulting mixture was stirred at 60 °C for 30 min. Then, the 0.5 mL of the reaction solution was diluted with 1.5 mL of EtOAc. The samples were immediately monitored by HRMS.

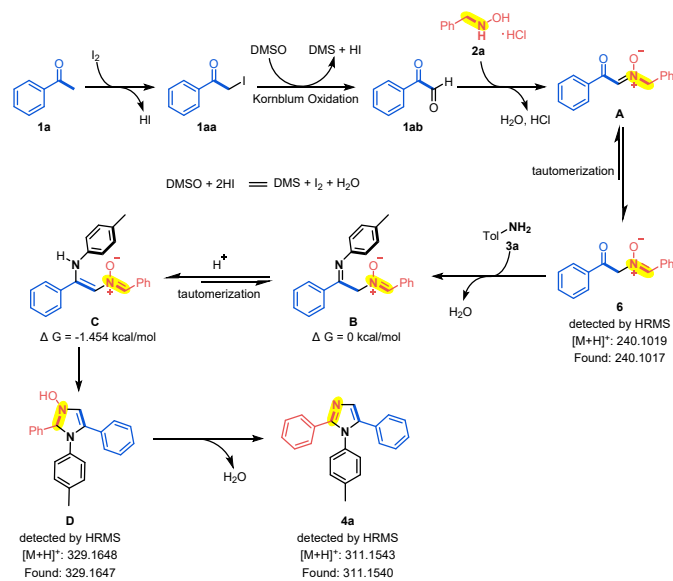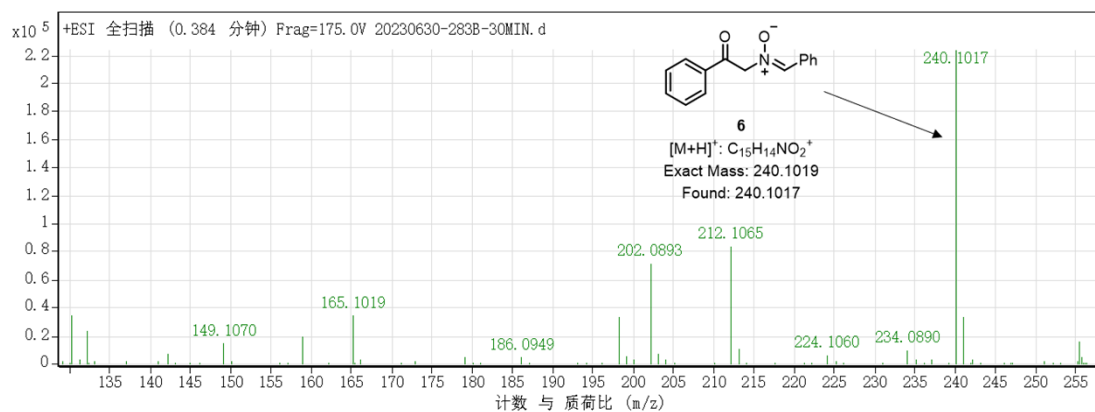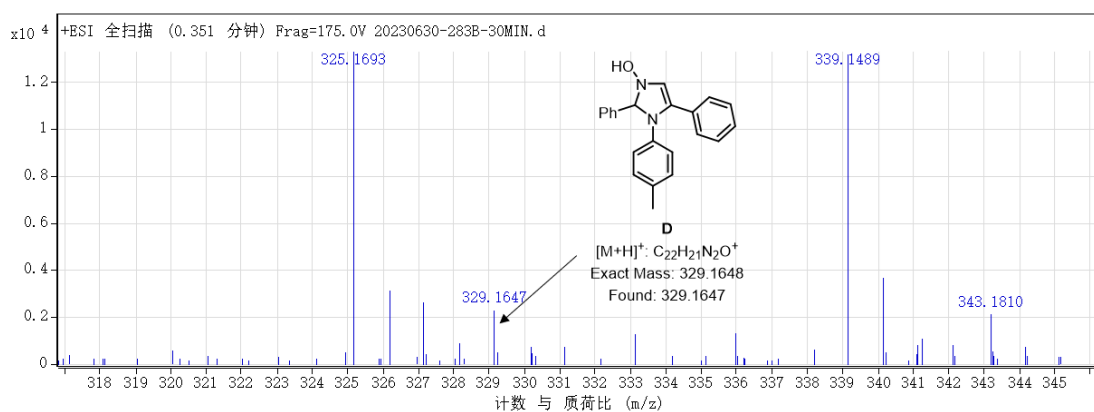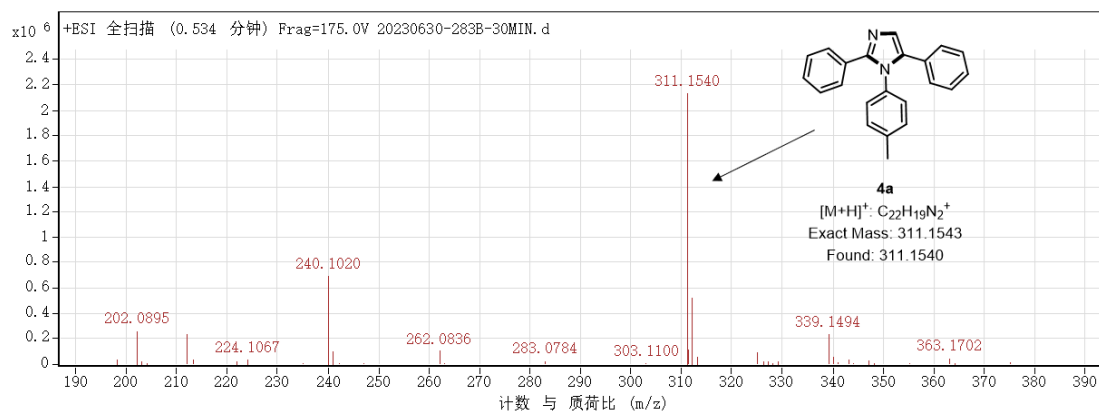

### 4.3 The free energies of the key intermediates **B** and **C**

We calculated the free energies of the key intermediates **B** and **C**. It turns out that the energy difference between the two was 1.454 kcal/mol, with **C** having less energy than **B**, thus, the conversion of **B** to **C** is thermodynamically advantageous (Software: Gaussian 09W; Method: b3lyp/lanl2dz).

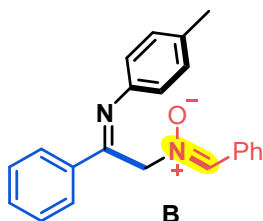

Free energy:  
-1034.68440659 hartree  
= -649274.8119792909 kcal/mol

Relative value: 0 kcal/mol

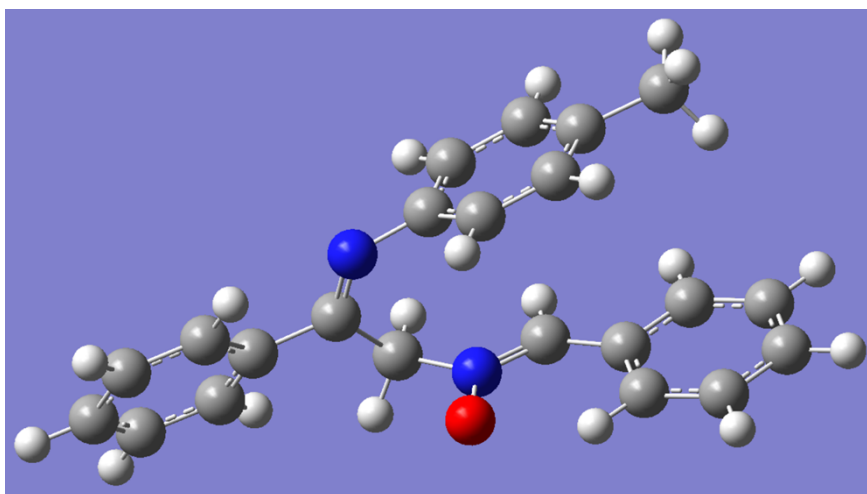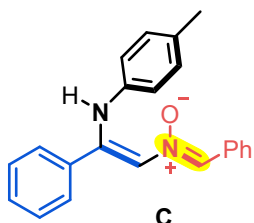

Free energy:  
-1034.68672411 hartree  
= -649276.2662462661 kcal/mol

Relative value: -1.454 kcal/mol

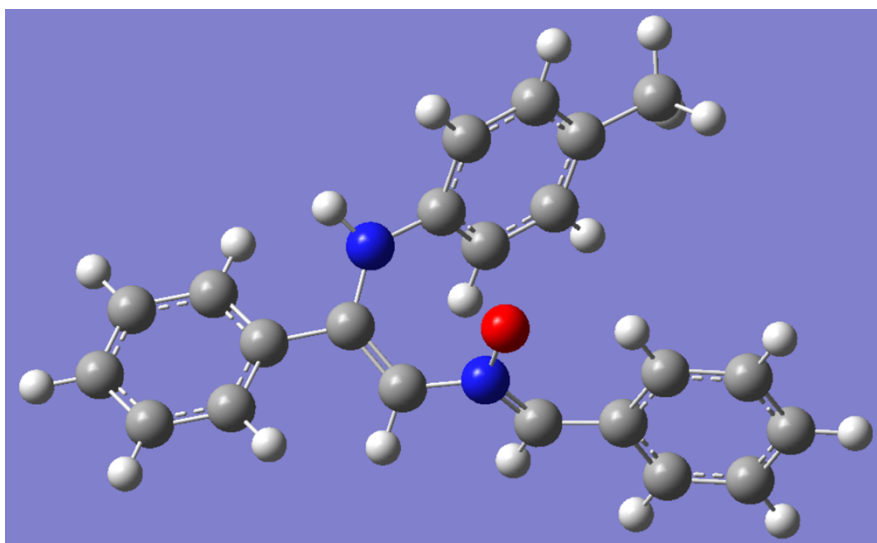

#### 4.4 The 2D NMR spectra (NOESY) of intermediate 6

We have performed the 2D NMR spectra (NOESY) of intermediate **6**, the spectrum indicated that -CH<sub>2</sub> and -CH were exist a spatial long-range coupling, thus indirectly showing that the two groups -Ph and PhCOCH<sub>2</sub>- were in trans-configuration.

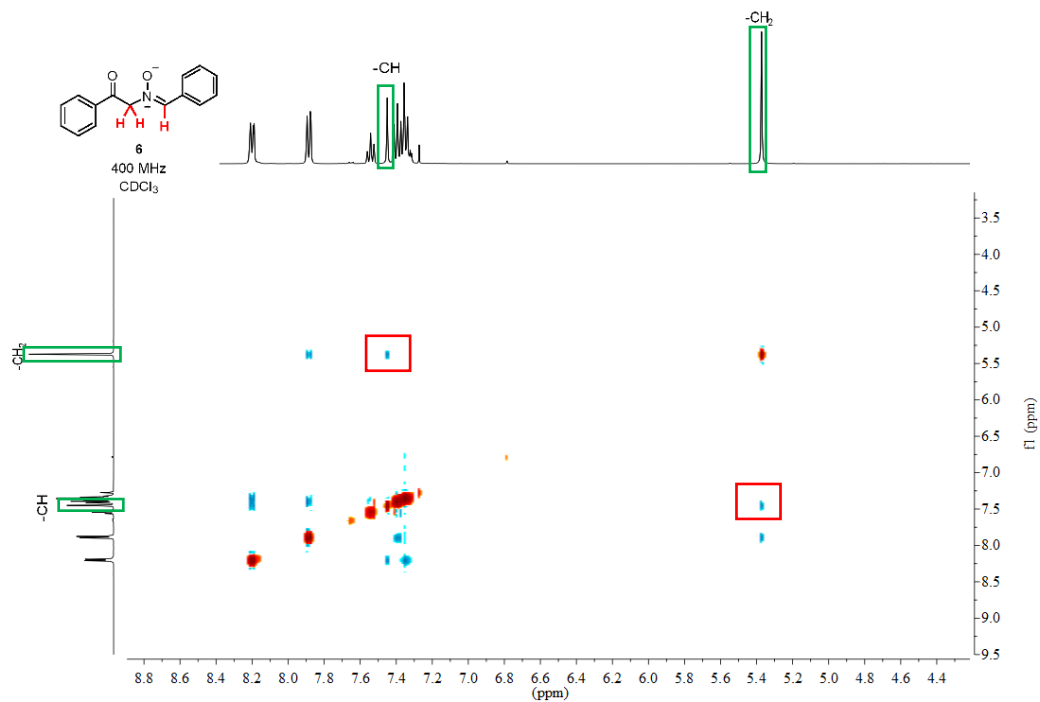

#### Reference

- [1] (a) Sun, H.; Gong, L.; Tian, Y.; Wu, J.; Zhang, X.; Liu, J.; Fu, Z.; Niu, D. Metal- and Base-Free Room-Temperature Amination of Organoboronic Acids with *N*-Alkyl Hydroxylamines. *Angew. Chem. Int. Ed.*, **2018**, *57*, 9456–9460; (b) Zhang, Z.; Sabat, N.; Frison, G.; Marinetti, A.; Guinchard, X. Enantioselective Au(I)-Catalyzed Multicomponent Annulations via Tethered Counterion-Directed Catalysis. *ACS Catal.*, **2022**, *12*, 4046–4053
- [2] (a) Zhang, Z.; Sabat, N.; Frison, G.; Marinetti, A.; Guinchard, X. *ACS Catal.*, **2022**, *12*, 4046–4053; (b) Zhang, M.; Kumagai, N.; Shibasaki, M. *Chemistry A European J*, **2017**, *23*, 12450–12455.

## 5. The crystallographic data

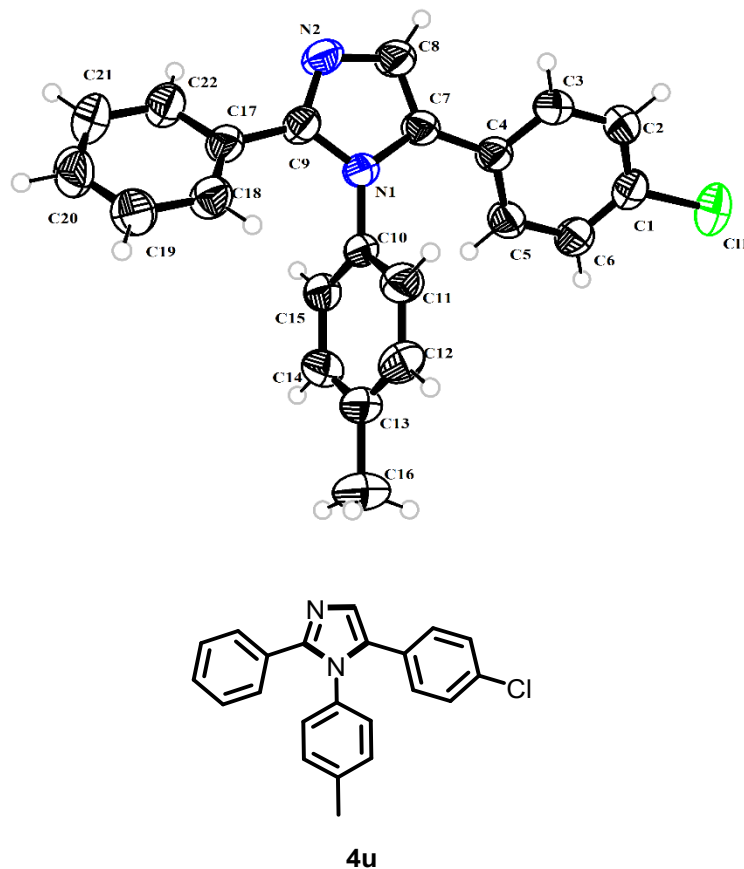

**Figure S1.** X-ray crystal structure of **4u** ORTEP (50%) drawing

Crystal Data for Compound **4u**: CCDC 2342462 contains the supplementary crystallographic data for this paper. These data can be obtained free of charge from The Cambridge Crystallographic.

Sample preparation: In a 10 mL glass bottle, 15 mg of pure **4u** was completely dissolved in the mixed solvent of 3 mL  $\text{CHCl}_3$ , and then 2 mL of n-hexane was added slowly. After a week of solvent evaporation, some yellow transparent crystals were obtained. The crystals were mounted on a glass fiber for diffraction experiments. Intensity data were collected on a Bruker SMART APEX CCD diffractometer with Mo  $K\alpha$  radiation (0.71073 Å) at room temperature.

Bond precision: C-C = 0.0044 Å

Wavelength=0.71073

Cell: a=16.652(3)  
alpha=90

b=14.997(2)  
beta=90

c=21.130(3)  
gamma=90

Temperature: 296 K

|                        | Calculated                             | Reported                               |
|------------------------|----------------------------------------|----------------------------------------|
| Volume                 | 5276.8(14)                             | 5277.0(14)                             |
| Space group            | P b c n                                | P b c n                                |
| Hall group             | -P 2n 2ab                              | -P 2n 2ab                              |
| Moiety formula         | C22 H18 Cl N2, C2 H F3 O2,<br>C2 F3 O2 | C22 H18 Cl N2, C2 H F3 O2,<br>C2 F3 O2 |
| Sum formula            | C26 H19 Cl F6 N2 O4                    | C26 H19 Cl F6 N2 O4                    |
| Mr                     | 572.88                                 | 572.88                                 |
| Dx, g cm <sup>-3</sup> | 1.442                                  | 1.442                                  |
| Z                      | 8                                      | 8                                      |
| Mu (mm <sup>-1</sup> ) | 0.222                                  | 0.222                                  |
| F000                   | 2336.0                                 | 2336.0                                 |
| F000'                  | 2338.82                                |                                        |
| h,k,lmax               | 19,17,25                               | 19,17,25                               |
| Nref                   | 4647                                   | 4625                                   |
| Tmin,Tmax              | 0.974,0.978                            | 0.605,0.745                            |
| Tmin'                  | 0.974                                  |                                        |

Correction method= # Reported T Limits: Tmin=0.605 Tmax=0.745

AbsCorr = MULTI-SCAN

Data completeness= 0.995

Theta(max)= 24.997

R(reflections)= 0.0611( 3441)

wR2(reflections)=  
0.1894( 4625)

S = 1.051

Npar= 405

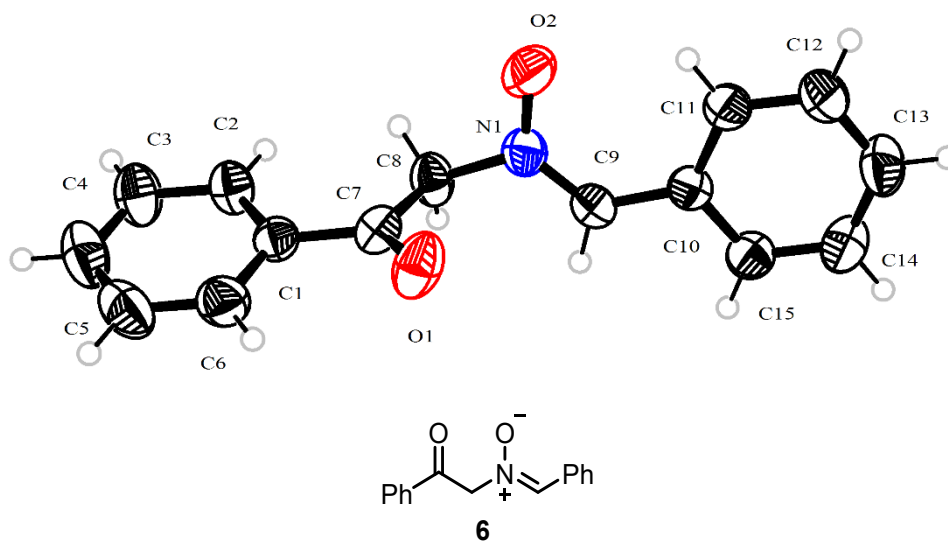

**Figure S1.** X-ray crystal structure of **6** ORTEP (50%) drawing

Crystal Data for Compound **6**: CCDC 2359610 contains the supplementary crystallographic data for this paper. These data can be obtained free of charge from The Cambridge Crystallographic.

Sample preparation: In a 10 mL glass bottle, 15 mg of pure **6** was completely dissolved in the mixed solvent of 3 mL CHCl<sub>3</sub>, and then 2 mL of n-hexane was added slowly. After a week of solvent evaporation, some yellow transparent crystals were obtained. The crystals were mounted on a glass fiber for diffraction experiments. Intensity data were collected on a Bruker SMART APEX CCD diffractometer with Mo K $\alpha$  radiation (0.71073 Å) at room temperature.

Bond precision: C-C = 0.0023 Å Wavelength=0.71073

Cell: a=12.719 (3) b=13.852 (3) c=14.156 (4)  
 alpha=90 beta=97.096 (4) gamma=90

Temperature: 296 K

|                        | Calculated   | Reported     |
|------------------------|--------------|--------------|
| Volume                 | 2475.0 (11)  | 2474.9 (11)  |
| Space group            | C 2/c        | C 1 2/c 1    |
| Hall group             | -C 2yc       | -C 2yc       |
| Moiety formula         | C15 H13 N O2 | C15 H13 N O2 |
| Sum formula            | C15 H13 N O2 | C15 H13 N O2 |
| Mr                     | 239.26       | 239.26       |
| Dx, g cm <sup>-3</sup> | 1.284        | 1.284        |
| Z                      | 8            | 8            |
| Mu (mm <sup>-1</sup> ) | 0.086        | 0.086        |
| F000                   | 1008.0       | 1008.0       |
| F000'                  | 1008.46      |              |
| h, k, lmax             | 17, 18, 19   | 17, 18, 19   |
| Nref                   | 3305         | 3298         |
| Tmin, Tmax             | 0.989, 0.991 | 0.692, 0.746 |
| Tmin'                  | 0.989        |              |

Correction method= # Reported T Limits: Tmin=0.692 Tmax=0.746  
 AbsCorr = MULTI-SCAN

Data completeness= 0.998 Theta(max)= 29.020

R(reflections)= 0.0490 ( 2212) wR2(reflections)=  
 0.1470 ( 3298)

S = 1.024 Npar= 163

## 6. Spectroscopic data

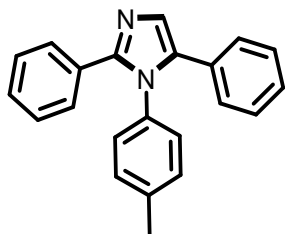

### 2,5-Diphenyl-1-(*p*-tolyl)-1*H*-imidazole (**4a**)

Purification by column chromatography on silica gel using petroleum ether/ethyl acetate (15:1 v/v) as eluent afforded **4a** (108.6 mg, yield 70%) as light yellow solid; m.p. 239-241 °C;  $^1\text{H}$  NMR (400 MHz,  $\text{CDCl}_3$ )  $\delta$  7.36 (s, 1H), 7.35 (s, 2H), 7.25–7.19 (m, 6H), 7.14–7.07 (m, 4H), 6.98 (d,  $J$  = 8.0 Hz, 2H), 2.37 (s, 3H);  $^{13}\text{C}$  NMR (100 MHz,  $\text{CDCl}_3$ )  $\delta$  147.9, 138.5, 135.1, 134.4, 130.5, 130.0, 129.8, 128.7, 128.4, 128.2, 128.1, 128.0, 127.9, 127.3, 21.2; HRMS (ESI)  $m/z$ :  $[\text{M}+\text{H}]^+$  Calcd for  $\text{C}_{22}\text{H}_{19}\text{N}_2^+$  311.1543; Found 311.1539.

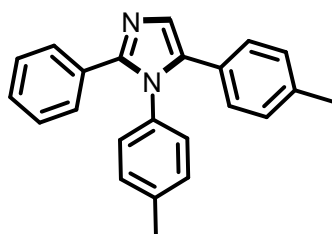

### 2-Phenyl-1,5-di-*p*-tolyl-1*H*-imidazole (**4b**)

Purification by column chromatography on silica gel using petroleum ether/ethyl acetate (10:1 v/v) as eluent afforded **4b** (101.5 mg, yield 68%) as white solid; m.p. 146-148 °C;  $^1\text{H}$  NMR (400 MHz,  $\text{CDCl}_3$ ,  $\text{CF}_3\text{COOD}$ )  $\delta$  7.68 (s, 1H), 7.43 (d,  $J$  = 7.6 Hz, 3H), 7.38–7.32 (m, 2H), 7.22 (d,  $J$  = 8.0 Hz, 2H), 7.10 (d,  $J$  = 7.6 Hz, 2H), 7.02–6.96 (m, 4H), 2.40 (s, 3H), 2.32 (s, 3H);  $^{13}\text{C}$  NMR (100 MHz,  $\text{CDCl}_3$ ,  $\text{CF}_3\text{COOD}$ )  $\delta$  144.7, 140.8, 139.6, 135.8, 131.3, 131.1, 130.6, 129.4, 129.1, 128.9, 128.8, 127.3, 123.3, 123.1, 118.8, 21.15, 21.12; HRMS (ESI)  $m/z$ :  $[\text{M}+\text{H}]^+$  Calcd for  $\text{C}_{23}\text{H}_{21}\text{N}_2^+$  325.1699; Found 325.1697.

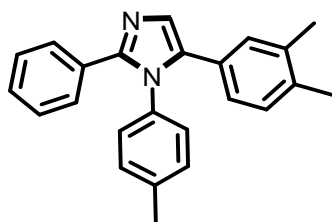

### 5-(3,4-Dimethylphenyl)-2-phenyl-1-(*p*-tolyl)-1*H*-imidazole (**4c**)

Purification by column chromatography on silica gel using petroleum ether/ethyl acetate (8:1 v/v) as eluent afforded **4c** (101.5mg, yield 60%) as light yellow solid; m.p. 160-162 °C;  $^1\text{H}$  NMR (400 MHz,  $\text{CDCl}_3$ )  $\delta$  7.36 (d,  $J$  = 7.2 Hz, 2H), 7.32 (s, 1H), 7.26–7.22 (m, 3H), 7.13 (d,  $J$  = 7.6 Hz, 2H), 7.01f–6.93 (m, 4H), 6.71 (d,  $J$  = 7.6 Hz, 1H), 2.38 (s, 3H), 2.21 (s, 3H), 2.16 (s, 3H);  $^{13}\text{C}$  NMR (100 MHz,  $\text{CDCl}_3$ )  $\delta$  147.6, 138.4, 136.5, 135.9, 135.3, 134.6, 130.4, 129.9, 129.7, 129.4, 128.7, 128.1,

128.02, 127.98, 127.3, 127.2, 125.8, 21.2, 19.7, 19.4; HRMS (ESI)  $m/z$ :  $[M+H]^+$  Calcd for  $C_{24}H_{23}N_2^+$  339.1856; Found 339.1853.

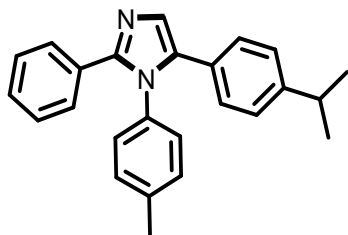

**5-(4-Isopropylphenyl)-2-phenyl-1-(*p*-tolyl)-1*H*-imidazole (4d)**

Purification by column chromatography on silica gel using petroleum ether/ethyl acetate (8:1 v/v) as eluent afforded **4d** (114.4 mg, yield 65%) as white solid; m.p. 164–166 °C;  $^1H$  NMR (400 MHz,  $CDCl_3$ )  $\delta$  7.37–7.33 (m, 2H), 7.32 (s, 1H), 7.23–7.20 (m, 3H), 7.12 (d,  $J$  = 8.0 Hz, 2H), 7.07 (d,  $J$  = 8.4 Hz, 2H), 7.02–6.97 (m, 4H), 2.88–2.80 (m, 1H), 2.37 (s, 3H), 1.20 (d,  $J$  = 6.8 Hz, 6H);  $^{13}C$  NMR (100 MHz,  $CDCl_3$ )  $\delta$  147.81, 147.76, 138.3, 135.1, 134.6, 130.7, 129.9, 128.7, 128.2, 127.94, 127.91, 127.8, 127.2, 126.2, 33.6, 23.8, 21.2; HRMS (ESI)  $m/z$ :  $[M+H]^+$  Calcd for  $C_{25}H_{25}N_2^+$  353.2012; Found 353.2011.

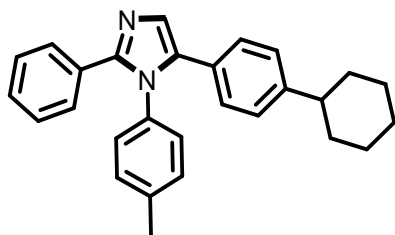

**5-(4-Cyclohexylphenyl)-2-phenyl-1-(*p*-tolyl)-1*H*-imidazole (4e)**

Purification by column chromatography on silica gel using petroleum ether/ethyl acetate (8:1 v/v) as eluent afforded **4e** (123.6 mg, yield 63%) as white solid; m.p. 190–192 °C;  $^1H$  NMR (400 MHz,  $CDCl_3$ )  $\delta$  7.36–7.33 (m, 2H), 7.32 (s, 1H), 7.23–7.19 (m, 3H), 7.12 (d,  $J$  = 8.0 Hz, 2H), 7.05 (d,  $J$  = 8.4 Hz, 2H), 7.01–6.96 (m, 4H), 2.46–2.39 (m, 1H), 2.37 (s, 3H), 1.85–1.79 (m, 4H), 1.72 (d,  $J$  = 12.4 Hz, 1H), 1.39–1.30 (m, 4H), 1.27–1.21 (m, 1H);  $^{13}C$  NMR (100 MHz,  $CDCl_3$ )  $\delta$  147.7, 147.1, 138.3, 135.1, 134.6, 130.7, 129.9, 128.7, 128.2, 127.94, 127.93, 127.7, 127.2, 126.6, 44.1, 34.2, 26.8, 26.0, 21.2; HRMS (ESI)  $m/z$ :  $[M+H]^+$  Calcd for  $C_{28}H_{29}N_2^+$  393.2325; Found 393.2323.

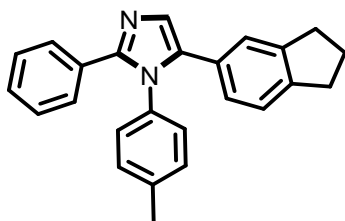

**5-(2,3-Dihydro-1*H*-inden-5-yl)-2-phenyl-1-(*p*-tolyl)-1*H*-imidazole (4f)**

Purification by column chromatography on silica gel using petroleum ether/ethyl acetate (10:1 v/v) as eluent afforded **4f** (103.3 mg, yield 59%) as white solid; m.p. 177–179 °C;  $^1H$  NMR (400 MHz,  $CDCl_3$ )  $\delta$  7.37–7.33 (m, 2H), 7.30 (s, 1H), 7.24–7.20 (m, 3H), 7.12 (d,  $J$  = 8.0 Hz, 2H), 7.04 (d,  $J$  = 7.6 Hz, 2H), 6.98 (d,  $J$  = 8.4 Hz, 2H), 6.77 (d,  $J$  = 8.0 Hz, 1H), 2.87–2.78 (m, 4H), 2.36 (s, 3H),

2.07–1.99 (m, 2H);  $^{13}\text{C}$  NMR (100 MHz,  $\text{CDCl}_3$ )  $\delta$  147.6, 144.2, 143.5, 138.3, 135.6, 134.6, 130.7, 129.9, 128.7, 128.0, 127.7, 127.6, 126.4, 124.5, 124.0, 32.7, 32.5, 25.2, 21.2; HRMS (ESI)  $m/z$ :  $[\text{M}+\text{H}]^+$  Calcd for  $\text{C}_{25}\text{H}_{23}\text{N}_2^+$  351.1856; Found 351.1854.

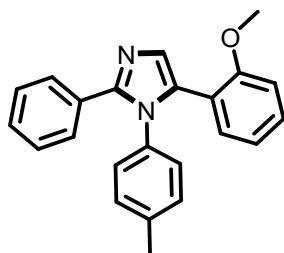

**5-(2-Methoxyphenyl)-2-phenyl-1-(p-tolyl)-1H-imidazole (4g)**

Purification by column chromatography on silica gel using petroleum ether/ethyl acetate (5:1 v/v) as eluent afforded **4g** (95.2 mg, yield 56%) as light yellow solid; m.p. 140–142 °C;  $^1\text{H}$  NMR (400 MHz,  $\text{CDCl}_3$ )  $\delta$  7.39–7.35 (m, 2H), 7.28–7.25 (m, 2H), 7.24–7.19 (m, 4H), 7.01 (d,  $J$  = 8.4 Hz, 2H), 6.92–6.87 (m, 3H), 6.72 (d,  $J$  = 8.4 Hz, 1H), 3.42 (s, 3H), 2.29 (s, 3H);  $^{13}\text{C}$  NMR (100 MHz,  $\text{CDCl}_3$ )  $\delta$  157.0, 147.2, 137.5, 135.1, 132.1, 132.0, 130.8, 129.8, 129.2, 128.7, 128.5, 127.9, 127.1, 120.2, 119.1, 110.5, 54.7, 21.1; HRMS (ESI)  $m/z$ :  $[\text{M}+\text{H}]^+$  Calcd for  $\text{C}_{23}\text{H}_{21}\text{N}_2\text{O}^+$  341.1648; Found 341.1647.

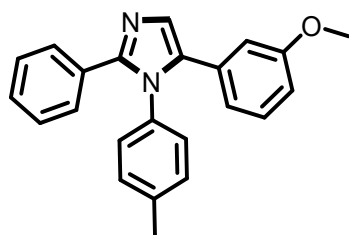

**5-(3-Methoxyphenyl)-2-phenyl-1-(p-tolyl)-1H-imidazole (4h)**

Purification by column chromatography on silica gel using petroleum ether/ethyl acetate (5:1 v/v) as eluent afforded **4h** (103.7 mg, yield 61%) as white solid; m.p. 160–162 °C;  $^1\text{H}$  NMR (400 MHz,  $\text{CDCl}_3$ )  $\delta$  7.36 (s, 3H), 7.25–7.20 (m, 3H), 7.15–7.10 (m, 3H), 6.99 (d,  $J$  = 7.6 Hz, 2H), 6.75 (d,  $J$  = 8.4 Hz, 1H), 6.70 (d,  $J$  = 7.6 Hz, 1H), 6.59 (s, 1H), 3.60 (s, 3H), 2.36 (s, 3H);  $^{13}\text{C}$  NMR (100 MHz,  $\text{CDCl}_3$ )  $\delta$  159.1, 148.0, 138.4, 134.29, 134.5, 131.0, 130.5, 129.9, 129.2, 128.7, 128.0, 127.94, 127.89, 120.8, 113.4, 113.2, 54.9, 21.1; HRMS (ESI)  $m/z$ :  $[\text{M}+\text{H}]^+$  Calcd for  $\text{C}_{23}\text{H}_{21}\text{N}_2\text{O}^+$  341.1648; Found 341.1644.

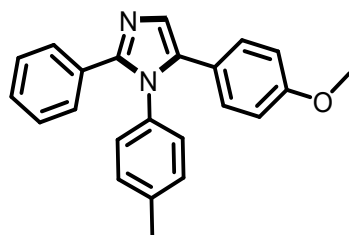

**5-(4-Methoxyphenyl)-2-phenyl-1-(p-tolyl)-1H-imidazole (4i)**

Purification by column chromatography on silica gel using petroleum ether/ethyl acetate (5:1 v/v) as eluent afforded **4i** (98.6 mg, yield 58%) as white solid; m.p. 173–175 °C;  $^1\text{H}$  NMR (400 MHz,

CDCl<sub>3</sub>)  $\delta$  7.35 (s, 2H), 7.29–7.20 (m, 4H), 7.11 (s, 2H), 7.04–6.94 (m, 4H), 6.76 (s, 2H), 3.76 (s, 3H), 2.37 (s, 3H); <sup>13</sup>C NMR (100 MHz, CDCl<sub>3</sub>)  $\delta$  158.8, 147.5, 138.3, 134.9, 134.5, 130.7, 129.9, 129.8, 128.6, 128.0, 127.3, 122.3, 113.6, 55.1, 21.2; HRMS (ESI)  $m/z$ : [M+H]<sup>+</sup> Calcd for C<sub>23</sub>H<sub>21</sub>N<sub>2</sub>O<sup>+</sup> 341.1648; Found 341.1646.

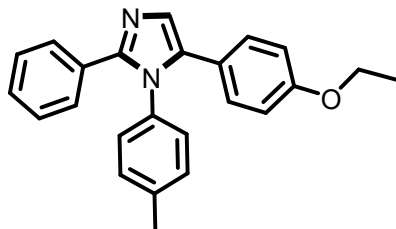

**5-(4-Ethoxyphenyl)-2-phenyl-1-(p-tolyl)-1H-imidazole (4j)**

Purification by column chromatography on silica gel using petroleum ether/ethyl acetate (5:1 v/v) as eluent afforded **4j** (100.9 mg, yield 57%) as white solid; m.p. 155–157 °C; <sup>1</sup>H NMR (400 MHz, CDCl<sub>3</sub>)  $\delta$  7.38–7.33 (m, 2H), 7.28 (s, 1H), 7.23 (s, 3H), 7.12 (d,  $J$  = 8.0 Hz, 2H), 7.01–6.94 (m, 4H), 6.74 (d,  $J$  = 8.4 Hz, 2H), 4.01–3.94 (m, 2H), 2.36 (s, 3H), 1.38 (t,  $J$  = 6.8 Hz, 3H); <sup>13</sup>C NMR (100 MHz, CDCl<sub>3</sub>)  $\delta$  158.2, 147.4, 138.3, 135.0, 134.5, 130.6, 129.9, 129.8, 128.7, 127.99, 127.97, 127.9, 127.1, 122.1, 114.1, 63.3, 21.2, 14.8; HRMS (ESI)  $m/z$ : [M+H]<sup>+</sup> Calcd for C<sub>24</sub>H<sub>23</sub>N<sub>2</sub>O<sup>+</sup> 355.1805; Found 355.1803.

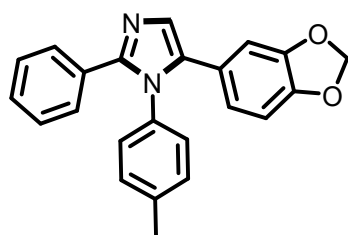

**5-(Benzo[d][1,3]dioxol-5-yl)-2-phenyl-1-(p-tolyl)-1H-imidazole (4k)**

Purification by column chromatography on silica gel using petroleum ether/ethyl acetate (5:1 v/v) as eluent afforded **4k** (109.8 mg, yield 62%) as light yellow solid; m.p. 207–209 °C; <sup>1</sup>H NMR (400 MHz, CDCl<sub>3</sub>)  $\delta$  7.36–7.32 (m, 2H), 7.26 (s, 1H), 7.22 (s, 3H), 7.12 (d,  $J$  = 7.6 Hz, 2H), 6.97 (d,  $J$  = 7.6 Hz, 2H), 6.67 (d,  $J$  = 8.0 Hz, 1H), 6.59 (d,  $J$  = 8.0 Hz, 1H), 6.54 (s, 1H), 5.89 (s, 2H), 2.36 (s, 3H); <sup>13</sup>C NMR (100 MHz, CDCl<sub>3</sub>)  $\delta$  147.6, 147.3, 146.9, 138.4, 134.8, 134.4, 130.6, 130.0, 128.6, 128.0, 127.9, 127.8, 127.6, 123.6, 122.5, 109.0, 108.1, 101.0, 21.2; HRMS (ESI)  $m/z$ : [M+H]<sup>+</sup> Calcd for C<sub>23</sub>H<sub>19</sub>N<sub>2</sub>O<sub>2</sub><sup>+</sup> 355.1441; Found 355.1440.

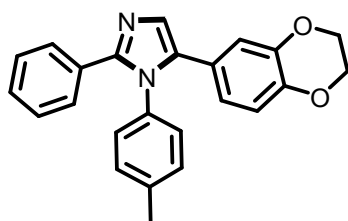

**5-(2,3-Dihydrobenzo[b][1,4]dioxin-6-yl)-2-phenyl-1-(p-tolyl)-1H-imidazole (4l)**

Purification by column chromatography on silica gel using petroleum ether/ethyl acetate (5:1 v/v) as eluent afforded **4l** (112.0 mg, yield 64%) as light yellow solid; m.p. 227–229 °C; <sup>1</sup>H NMR (400

MHz, CDCl<sub>3</sub>)  $\delta$  7.34 (s, 2H), 7.28–7.19 (m, 4H), 7.12 (s, 2H), 6.98 (s, 2H), 6.67 (s, 2H), 6.50 (s, 1H), 4.20 (s, 4H), 2.37 (s, 3H); <sup>13</sup>C NMR (100 MHz, CDCl<sub>3</sub>)  $\delta$  147.6, 143.1, 143.0, 138.4, 134.7, 134.5, 130.7, 129.9, 128.6, 127.9, 127.5, 123.2, 121.8, 117.4, 117.0, 64.3, 64.2, 21.2; HRMS (ESI)  $m/z$ : [M+H]<sup>+</sup> Calcd for C<sub>24</sub>H<sub>21</sub>N<sub>2</sub>O<sub>2</sub><sup>+</sup> 369.1598; Found 369.1599.

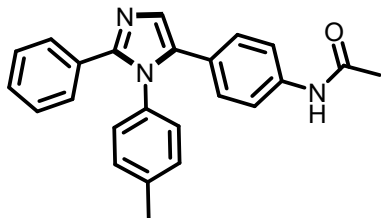

***N*-(4-(2-phenyl-1-(*p*-tolyl)-1*H*-imidazol-5-yl)phenyl)acetamide (4m)**

Purification by column chromatography on silica gel using petroleum ether/ethyl acetate (1:1 v/v) as eluent afforded **4m** (112.0 mg, yield 61%) as yellow solid; m.p. 140–142 °C; <sup>1</sup>H NMR (400 MHz, CDCl<sub>3</sub>, CF<sub>3</sub>COOD)  $\delta$  8.86 (s, 1H), 7.55–7.47 (m, 4H), 7.40–7.31 (m, 4H), 7.22 (d,  $J$  = 6.8 Hz, 2H), 7.07–6.98 (m, 4H), 2.38 (s, 3H), 2.17 (s, 3H); <sup>13</sup>C NMR (100 MHz, CDCl<sub>3</sub>, CF<sub>3</sub>COOD)  $\delta$  172.1, 145.1, 141.7, 139.0, 138.9, 136.2, 132.4, 131.0, 130.1, 129.8, 129.3, 129.1, 127.2, 121.9, 121.3, 120.6, 120.5, 117.0, 23.43, 23.38, 21.1; HRMS (ESI)  $m/z$ : [M+H]<sup>+</sup> Calcd for C<sub>24</sub>H<sub>22</sub>N<sub>3</sub>O<sup>+</sup> 368.1757; Found 368.1755.

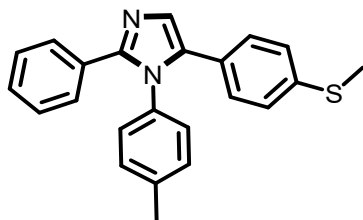

**5-(4-(Methylthio)phenyl)-2-phenyl-1-(*p*-tolyl)-1*H*-imidazole (4n)**

Purification by column chromatography on silica gel using petroleum ether/ethyl acetate (5:1 v/v) as eluent afforded **4n** (105.1 mg, yield 59%) as white solid; m.p. 171–173 °C; <sup>1</sup>H NMR (400 MHz, CDCl<sub>3</sub>)  $\delta$  7.37–7.33 (m, 2H), 7.28–7.22 (m, 4H), 7.14 (d,  $J$  = 7.6 Hz, 2H), 7.10 (s, 1H), 7.08 (s, 1H), 7.01–6.96 (m, 4H), 2.45 (s, 3H), 2.38 (s, 3H); <sup>13</sup>C NMR (100 MHz, CDCl<sub>3</sub>)  $\delta$  147.9, 138.6, 137.8, 134.7, 134.3, 130.3, 130.1, 128.73, 128.67, 128.2, 128.1, 127.9, 127.6, 126.4, 125.9, 21.2, 15.4; HRMS (ESI)  $m/z$ : [M+H]<sup>+</sup> Calcd for C<sub>23</sub>H<sub>21</sub>N<sub>2</sub>S<sup>+</sup> 357.1420; Found 357.1418.

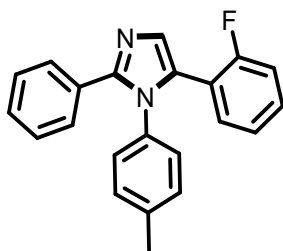

**5-(2-Fluorophenyl)-2-phenyl-1-(*p*-tolyl)-1*H*-imidazole (4o)**

Purification by column chromatography on silica gel using petroleum ether/ethyl acetate (8:1 v/v) as eluent afforded **4o** (106.6 mg, yield 65%) as light yellow solid; m.p. 164–166 °C; <sup>1</sup>H NMR (400

MHz, CDCl<sub>3</sub>)  $\delta$  7.39–7.34 (m, 3H), 7.26–7.19 (m, 4H), 7.06 (d,  $J$  = 7.6 Hz, 3H), 7.02–6.92 (m, 4H), 2.32 (s, 3H); <sup>13</sup>C NMR (100 MHz, CDCl<sub>3</sub>)  $\delta$  159.9 (d,  $J$  = 247.0 Hz, <sup>1</sup> $J_{CF}$ ), 148.0, 138.2, 134.4, 131.7 (d,  $J$  = 2.0 Hz, <sup>4</sup> $J_{CF}$ ), 130.5, 129.7 (d,  $J$  = 11.0 Hz, <sup>3</sup> $J_{CF}$ ), 129.69, 129.6, 128.8, 128.6, 128.1, 128.0, 127.4, 123.7 (d,  $J$  = 4.0 Hz, <sup>3</sup> $J_{CF}$ ), 118.0 (d,  $J$  = 15.0 Hz, <sup>2</sup> $J_{CF}$ ), 115.6 (d,  $J$  = 22.0 Hz, <sup>2</sup> $J_{CF}$ ), 21.1; <sup>19</sup>F NMR (376 MHz, CDCl<sub>3</sub>)  $\delta$  -111.80; HRMS (ESI)  $m/z$ : [M+H]<sup>+</sup> Calcd for C<sub>22</sub>H<sub>18</sub>FN<sub>2</sub><sup>+</sup> 329.1449; Found 329.1448.

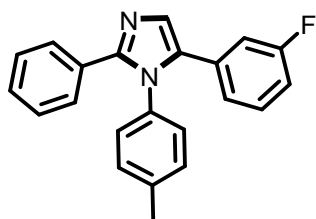

**5-(3-Fluorophenyl)-2-phenyl-1-(*p*-tolyl)-1*H*-imidazole (4p)**

Purification by column chromatography on silica gel using petroleum ether/ethyl acetate (8:1 v/v) as eluent afforded **4p** (109.9 mg, yield 67%) as light yellow solid; m.p. 179–181 °C; <sup>1</sup>H NMR (400 MHz, CDCl<sub>3</sub>)  $\delta$  7.38–7.34 (m, 3H), 7.25–7.20 (m, 3H), 7.18–7.11 (m, 3H), 6.99 (d,  $J$  = 8.0 Hz, 2H), 6.92–6.85 (m, 2H), 6.76 (d,  $J$  = 10.0 Hz, 1H), 2.38 (s, 3H); <sup>13</sup>C NMR (100 MHz, CDCl<sub>3</sub>)  $\delta$  162.4 (d,  $J$  = 244.0 Hz, <sup>1</sup> $J_{CF}$ ), 148.4, 138.8, 134.2, 133.8 (d,  $J$  = 2.0 Hz, <sup>4</sup> $J_{CF}$ ), 131.9 (d,  $J$  = 8.0 Hz, <sup>3</sup> $J_{CF}$ ), 130.4, 130.1, 129.7 (d,  $J$  = 8.0 Hz, <sup>3</sup> $J_{CF}$ ), 128.7, 128.6, 128.2, 128.0, 127.8, 123.9 (d,  $J$  = 3.0 Hz, <sup>4</sup> $J_{CF}$ ), 115.0 (d,  $J$  = 23.0 Hz, <sup>2</sup> $J_{CF}$ ), 114.0 (d,  $J$  = 20.0 Hz, <sup>2</sup> $J_{CF}$ ), 21.2; <sup>19</sup>F NMR (376 MHz, CDCl<sub>3</sub>)  $\delta$  -112.78; HRMS (ESI)  $m/z$ : [M+H]<sup>+</sup> Calcd for C<sub>22</sub>H<sub>18</sub>FN<sub>2</sub><sup>+</sup> 329.1449; Found 329.1445.

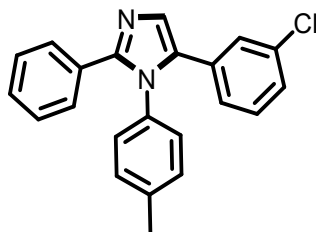

**5-(3-Chlorophenyl)-2-phenyl-1-(*p*-tolyl)-1*H*-imidazole (4q)**

Purification by column chromatography on silica gel using petroleum ether/ethyl acetate (8:1 v/v) as eluent afforded **4q** (110.1 mg, yield 64%) as white solid; m.p. 158–160 °C; <sup>1</sup>H NMR (400 MHz, CDCl<sub>3</sub>)  $\delta$  7.39–7.33 (m, 3H), 7.26–7.19 (m, 3H), 7.18–7.09 (m, 5H), 6.98 (d,  $J$  = 8.0 Hz, 2H), 6.88 (d,  $J$  = 7.6 Hz, 1H), 2.38 (s, 3H); <sup>13</sup>C NMR (100 MHz, CDCl<sub>3</sub>)  $\delta$  148.4, 138.8, 134.1, 134.0, 133.6, 131.6, 130.3, 130.1, 129.4, 128.7, 128.5, 128.3, 128.2, 128.0, 127.8, 127.2, 126.3, 21.2; HRMS (ESI)  $m/z$ : [M+H]<sup>+</sup> Calcd for C<sub>22</sub>H<sub>18</sub>ClN<sub>2</sub><sup>+</sup> 345.1153; Found 345.1152.

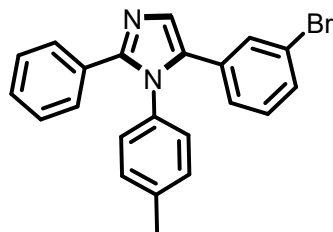

**5-(3-Bromophenyl)-2-phenyl-1-(*p*-tolyl)-1*H*-imidazole (4r)**

Purification by column chromatography on silica gel using petroleum ether/ethyl acetate (8:1 v/v) as eluent afforded **4r** (120.3 mg, yield 62%) as light yellow solid; m.p. 166-168 °C; <sup>1</sup>H NMR (400 MHz, CDCl<sub>3</sub>) δ 7.40–7.29 (m, 5H), 7.28–7.21 (m, 3H), 7.15 (d, *J* = 7.6 Hz, 2H), 7.07–7.02 (m, 1H), 6.98 (d, *J* = 7.6 Hz, 2H), 6.91 (d, *J* = 7.2 Hz, 1H), 2.38 (s, 3H); <sup>13</sup>C NMR (100 MHz, CDCl<sub>3</sub>) δ 148.4, 138.8, 134.1, 133.5, 131.8, 131.1, 130.2, 130.1, 129.6, 128.7, 128.4, 128.3, 128.0, 127.8, 126.7, 122.2, 21.2; HRMS (ESI) *m/z*: [M+H]<sup>+</sup> Calcd for C<sub>22</sub>H<sub>18</sub>BrN<sub>2</sub><sup>+</sup> 389.0648; Found 389.0644.

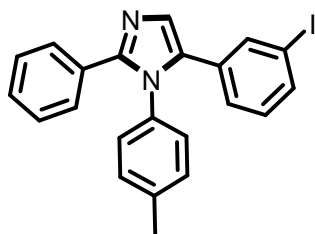

**5-(3-Iodophenyl)-2-phenyl-1-(p-tolyl)-1H-imidazole (4s)**

Purification by column chromatography on silica gel using petroleum ether/ethyl acetate (10:1 v/v) as eluent afforded **4s** (141.7 mg, yield 65%) as light yellow solid; m.p. 150-152 °C; <sup>1</sup>H NMR (400 MHz, CDCl<sub>3</sub>, CF<sub>3</sub>COOD) δ 7.70 (s, 1H), 7.67–7.61 (m, 1H), 7.53 (s, 1H), 7.46–7.39 (m, 3H), 7.36–7.31 (m, 2H), 7.24 (d, *J* = 8.0 Hz, 2H), 7.05–6.98 (m, 4H), 2.40 (s, 3H); <sup>13</sup>C NMR (100 MHz, CDCl<sub>3</sub>, CF<sub>3</sub>COOD) δ 145.4, 140.8, 137.9, 137.4, 133.7, 131.1, 130.7, 130.6, 130.0, 128.9, 128.8, 128.1, 127.8, 127.2, 123.4, 120.1, 93.9, 21.0; HRMS (ESI) *m/z*: [M+H]<sup>+</sup> Calcd for C<sub>22</sub>H<sub>18</sub>IN<sub>2</sub><sup>+</sup> 437.0509; Found 437.0506.

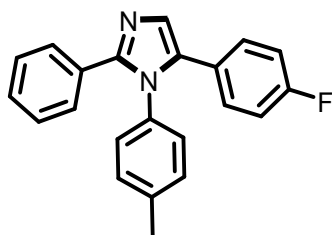

**5-(4-Fluorophenyl)-2-phenyl-1-(p-tolyl)-1H-imidazole (4t)**

Purification by column chromatography on silica gel using petroleum ether/ethyl acetate (12:1 v/v) as eluent afforded **4t** (100.1mg, yield 61%) as light yellow solid; m.p. 200-202 °C; <sup>1</sup>H NMR (400 MHz, CDCl<sub>3</sub>) δ 7.35 (d, *J* = 6.4 Hz, 2H), 7.31 (s, 1H), 7.27–7.21 (m, 3H), 7.13 (d, *J* = 7.6 Hz, 2H), 7.09–7.02 (m, 2H), 6.99–6.87 (m, 4H), 2.37 (s, 3H); <sup>13</sup>C NMR (100 MHz, CDCl<sub>3</sub>) δ 162.0 (d, *J* = 246.0 Hz, <sup>1</sup>*J*<sub>CF</sub>), 148.0, 138.6, 134.3, 134.1, 130.6, 130.3, 130.2, 130.1, 128.7, 128.1, 128.03, 127.98, 127.9, 126.1 (d, *J* = 4.0 Hz, <sup>3</sup>*J*<sub>CF</sub>), 115.3 (d, *J* = 21.0 Hz, <sup>2</sup>*J*<sub>CF</sub>), 21.2; <sup>19</sup>F NMR (376 MHz, CDCl<sub>3</sub>) δ -114.34; HRMS (ESI) *m/z*: [M+H]<sup>+</sup> Calcd for C<sub>22</sub>H<sub>18</sub>FN<sub>2</sub><sup>+</sup> 329.1449; Found 329.1446.

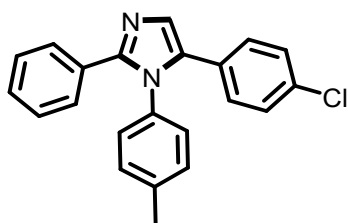

**5-(4-Chlorophenyl)-2-phenyl-1-(p-tolyl)-1H-imidazole (4u)**

Purification by column chromatography on silica gel using petroleum ether/ethyl acetate (8:1 v/v) as eluent afforded **4u** (108.4 mg, yield 63%) as light yellow solid; m.p. 120-122 °C; <sup>1</sup>H NMR (400 MHz, CDCl<sub>3</sub>, CF<sub>3</sub>COOD) δ 7.70 (s, 1H), 7.52–7.46 (m, 1H), 7.38 (d, *J* = 4.0 Hz, 4H), 7.31 (d, *J* = 8.0 Hz, 2H), 7.26 (d, *J* = 3.2 Hz, 1H), 7.24 (s, 1H), 7.09–7.00 (m, 4H), 2.41 (s, 3H); <sup>13</sup>C NMR (100 MHz, CDCl<sub>3</sub>, CF<sub>3</sub>COOD) δ 145.3, 141.6, 136.4, 135.2, 132.3, 131.0, 130.4, 130.2, 129.3, 129.2, 127.3, 123.8, 121.9, 117.8, 21.2; HRMS (ESI) *m/z*: [M+H]<sup>+</sup> Calcd for C<sub>22</sub>H<sub>18</sub>ClN<sub>2</sub><sup>+</sup> 345.1153; Found 345.1150.

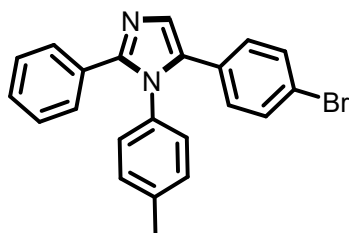

**5-(4-Bromophenyl)-2-phenyl-1-(*p*-tolyl)-1*H*-imidazole (4v)**

Purification by column chromatography on silica gel using petroleum ether/ethyl acetate (15:1 v/v) as eluent afforded **4v** (116.4 mg, yield 60%) as yellow solid; m.p. 204-206 °C; <sup>1</sup>H NMR (400 MHz, CDCl<sub>3</sub>) δ 7.35 (d, *J* = 8.4 Hz, 5H), 7.27–7.23 (m, 3H), 7.15 (d, *J* = 8.0 Hz, 2H), 7.00–6.92 (m, 4H), 2.39 (s, 3H); <sup>13</sup>C NMR (100 MHz, CDCl<sub>3</sub>) δ 148.3, 138.8, 134.1, 133.9, 131.4, 130.2, 129.8, 128.7, 128.3, 128.1, 128.0, 127.8, 121.5, 21.2; HRMS (ESI) *m/z*: [M+H]<sup>+</sup> Calcd for C<sub>22</sub>H<sub>18</sub>BrN<sub>2</sub><sup>+</sup> 389.0648; Found 389.0647.

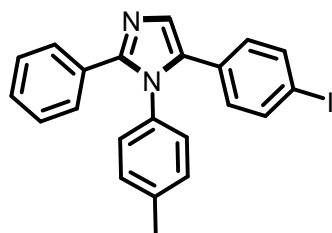

**5-(4-Iodophenyl)-2-phenyl-1-(*p*-tolyl)-1*H*-imidazole (4w)**

Purification by column chromatography on silica gel using petroleum ether/ethyl acetate (10:1 v/v) as eluent afforded **4w** (114.2 mg, yield 62%) as white solid; m.p. 210-212 °C; <sup>1</sup>H NMR (400 MHz, CDCl<sub>3</sub>) δ 7.53 (s, 2H), 7.34 (s, 3H), 7.23 (s, 3H), 7.13 (s, 2H), 6.97 (s, 2H), 6.80 (d, *J* = 4.4 Hz, 2H), 2.38 (s, 3H); <sup>13</sup>C NMR (100 MHz, CDCl<sub>3</sub>) δ 148.4, 138.7, 137.3, 134.2, 133.9, 130.4, 130.1, 129.9, 129.4, 128.7, 128.3, 128.2, 128.0, 127.8, 93.0, 21.2; HRMS (ESI) *m/z*: [M+H]<sup>+</sup> Calcd for C<sub>22</sub>H<sub>18</sub>IN<sub>2</sub><sup>+</sup> 437.0509; Found 437.0507.

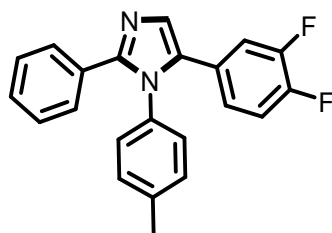

**5-(3,4-Difluorophenyl)-2-phenyl-1-(*p*-tolyl)-1*H*-imidazole (4x)**

Purification by column chromatography on silica gel using petroleum ether/ethyl acetate (5:1 v/v) as eluent afforded **4x** (114.2 mg, yield 66%) as light yellow solid; m.p. 161-163 °C; <sup>1</sup>H NMR (400 MHz, CDCl<sub>3</sub>) δ 7.38–7.31 (m, 3H), 7.24 (s, 3H), 7.16 (d, *J* = 7.2 Hz, 2H), 7.05–6.95 (m, 3H), 6.90–6.79 (m, 2H), 2.38 (s, 3H); <sup>13</sup>C NMR (100 MHz, CDCl<sub>3</sub>) δ 149.8 (dd, <sup>1</sup>*J*<sub>CF</sub> = 247.0 Hz, <sup>2</sup>*J*<sub>CF</sub> = 27.0 Hz), 149.6 (dd, <sup>1</sup>*J*<sub>CF</sub> = 247.0 Hz, <sup>2</sup>*J*<sub>CF</sub> = 26.0 Hz), 148.4, 138.9, 134.0, 133.0, 130.3, 130.2, 128.6, 128.4, 128.3, 128.0, 127.8, 126.9 (dd, <sup>3</sup>*J*<sub>CF</sub> = 6.0 Hz, <sup>4</sup>*J*<sub>CF</sub> = 2.0 Hz), 124.5 (dd, <sup>3</sup>*J*<sub>CF</sub> = 6.0 Hz, <sup>4</sup>*J*<sub>CF</sub> = 4.0 Hz), 117.2 (dd, <sup>2</sup>*J*<sub>CF</sub> = 18.0 Hz, <sup>3</sup>*J*<sub>CF</sub> = 8.0 Hz), 21.1; <sup>19</sup>F NMR (376 MHz, CDCl<sub>3</sub>) δ -137.25, -137.30, -138.96, -139.02; HRMS (ESI) *m/z*: [M+H]<sup>+</sup> Calcd for C<sub>22</sub>H<sub>17</sub>F<sub>2</sub>N<sub>2</sub><sup>+</sup> 347.1354; Found 347.1356.

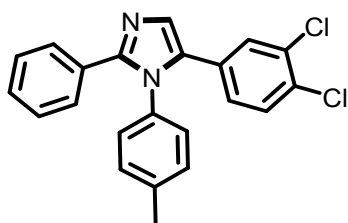

#### 5-(3,4-Dichlorophenyl)-2-phenyl-1-(*p*-tolyl)-1*H*-imidazole (**4y**)

Purification by column chromatography on silica gel using petroleum ether/ethyl acetate (8:1 v/v) as eluent afforded **4y** (109.6 mg, yield 58%) as white solid; m.p. 178-180 °C; <sup>1</sup>H NMR (400 MHz, CDCl<sub>3</sub>) δ 7.40–7.33 (m, 3H), 7.25 (d, *J* = 8.0 Hz, 5H), 7.17 (d, *J* = 7.2 Hz, 2H), 6.99 (d, *J* = 7.2 Hz, 2H), 6.81 (d, *J* = 8.0 Hz, 1H), 2.40 (s, 3H); <sup>13</sup>C NMR (100 MHz, CDCl<sub>3</sub>) δ 148.7, 139.1, 133.9, 132.7, 132.4, 131.3, 130.3, 130.2, 130.1, 129.9, 128.72, 128.65, 128.4, 128.1, 127.8, 127.3, 21.2; HRMS (ESI) *m/z*: [M+H]<sup>+</sup> Calcd for C<sub>22</sub>H<sub>17</sub>Cl<sub>2</sub>N<sub>2</sub><sup>+</sup> 379.0763; Found 379.0761.

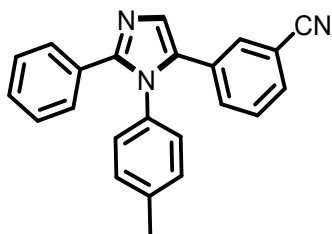

#### 3-(2-Phenyl-1-(*p*-tolyl)-1*H*-imidazol-5-yl)benzonitrile (**4z**)

Purification by column chromatography on silica gel using petroleum ether/ethyl acetate (5:1 v/v) as eluent afforded **4z** (103.9 mg, yield 62%) as white solid; m.p. 161-163 °C; <sup>1</sup>H NMR (400 MHz, CDCl<sub>3</sub>) δ 7.48 (d, *J* = 6.8 Hz, 1H), 7.41 (s, 1H), 7.38–7.30 (m, 5H), 7.28–7.22 (m, 3H), 7.17 (d, *J* = 8.0 Hz, 2H), 6.98 (d, *J* = 8.0 Hz, 2H), 2.40 (s, 3H); <sup>13</sup>C NMR (100 MHz, CDCl<sub>3</sub>) δ 148.9, 139.1, 133.8, 132.7, 132.2, 131.3, 130.5, 130.3, 130.1, 129.1, 128.7, 128.4, 128.1, 127.7, 118.3, 112.5, 21.2; HRMS (ESI) *m/z*: [M+H]<sup>+</sup> Calcd for C<sub>23</sub>H<sub>18</sub>N<sub>3</sub><sup>+</sup> 336.1495; Found 336.1491.

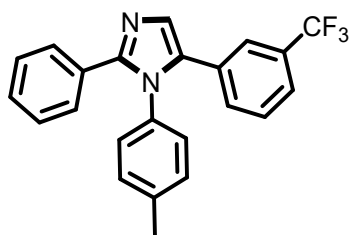

**2-Phenyl-1-(*p*-tolyl)-5-(3-(trifluoromethyl)phenyl)-1*H*-imidazole (4aa)**

Purification by column chromatography on silica gel using petroleum ether/ethyl acetate (5:1 v/v) as eluent afforded **4aa** (109.7 mg, yield 58%) as white solid; m.p. 187-189 °C; <sup>1</sup>H NMR (400 MHz, CDCl<sub>3</sub>) δ 7.47–7.42 (m, 2H), 7.40–7.36 (m, 2H), 7.35–7.30 (m, 2H), 7.28–7.22 (m, 4H), 7.16 (d, *J* = 8.0 Hz, 2H), 6.99 (d, *J* = 8.4 Hz, 2H), 2.38 (s, 3H); <sup>13</sup>C NMR (100 MHz, CDCl<sub>3</sub>) δ 148.6, 139.0, 134.1, 133.6, 131.3, 130.7, 130.6 (q, *J* = 32.0 Hz, <sup>2</sup>*J*<sub>CF</sub>), 130.3, 130.2, 128.73, 128.69, 128.67, 128.3, 128.1, 127.8, 124.9 (q, *J* = 4.0 Hz, <sup>3</sup>*J*<sub>CF</sub>), 123.75 (q, *J* = 271.0 Hz, <sup>1</sup>*J*<sub>CF</sub>), 123.73 (q, *J* = 4.0 Hz, <sup>3</sup>*J*<sub>CF</sub>), 21.1; <sup>19</sup>F NMR (376 MHz, CDCl<sub>4</sub>) δ -62.98; HRMS (ESI) *m/z*: [M+H]<sup>+</sup> Calcd for C<sub>23</sub>H<sub>18</sub>F<sub>3</sub>N<sub>2</sub><sup>+</sup> 379.1417; Found 379.1415.

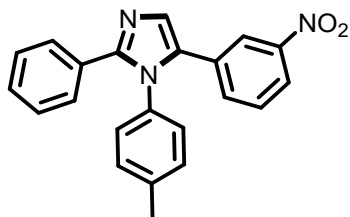**5-(3-Nitrophenyl)-2-phenyl-1-(*p*-tolyl)-1*H*-imidazole (4ab)**

Purification by column chromatography on silica gel using petroleum ether/ethyl acetate (5:1 v/v) as eluent afforded **4ab** (133.0 mg, yield 61%) as light yellow solid; m.p. 156-158 °C; <sup>1</sup>H NMR (400 MHz, CDCl<sub>3</sub>) δ 8.08–8.02 (m, 1H), 7.93 (d, *J* = 1.2 Hz, 1H), 7.48 (s, 1H), 7.41–7.36 (m, 4H), 7.28–7.24 (m, 3H), 7.19 (d, *J* = 8.0 Hz, 2H), 7.02 (d, *J* = 8.4 Hz, 2H), 2.40 (s, 3H); <sup>13</sup>C NMR (100 MHz, CDCl<sub>3</sub>) δ 149.1, 148.0, 139.3, 133.8, 133.7, 132.6, 131.6, 130.4, 130.1, 129.24, 129.19, 128.7, 128.5, 128.1, 127.8, 122.6, 121.8, 21.2; HRMS (ESI) *m/z*: [M+H]<sup>+</sup> Calcd for C<sub>22</sub>H<sub>18</sub>N<sub>3</sub>O<sub>2</sub><sup>+</sup> 356.1394; Found 356.1391.

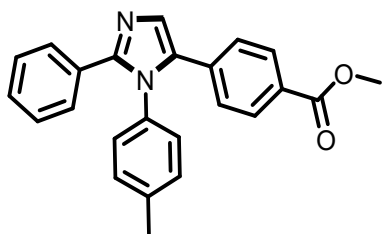**Methyl 4-(2-phenyl-1-(*p*-tolyl)-1*H*-imidazol-5-yl)benzoate (4ac)**

Purification by column chromatography on silica gel using petroleum ether/ethyl acetate (8:1 v/v) as eluent afforded **4ac** (110.4 mg, yield 60%) as white solid; m.p. 187-189 °C; <sup>1</sup>H NMR (400 MHz, CDCl<sub>3</sub>) δ 7.88 (d, *J* = 8.4 Hz, 2H), 7.45 (s, 1H), 7.38–7.34 (m, 2H), 7.26–7.21 (m, 3H), 7.16–7.11 (m, 4H), 6.98 (d, *J* = 8.4 Hz, 2H), 3.87 (s, 3H), 2.38 (s, 3H); <sup>13</sup>C NMR (100 MHz, CDCl<sub>3</sub>) δ 166.6, 148.8, 138.8, 134.3, 134.2, 133.9, 130.3, 130.1, 129.4, 129.2, 128.7, 128.4, 128.2, 128.0, 127.8, 127.7, 52.0, 21.1; HRMS (ESI) *m/z*: [M+H]<sup>+</sup> Calcd for C<sub>24</sub>H<sub>21</sub>N<sub>2</sub>O<sub>2</sub><sup>+</sup> 369.1598; Found 369.1599.

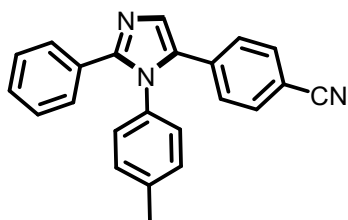

#### 4-(2-Phenyl-1-(*p*-tolyl)-1*H*-imidazol-5-yl)benzonitrile (4ad)

Purification by column chromatography on silica gel using petroleum ether/ethyl acetate (5:1 v/v) as eluent afforded **4ad** (95.5 mg, yield 57%) as white solid; m.p. 212-214 °C; <sup>1</sup>H NMR (400 MHz, CDCl<sub>3</sub>) δ 7.52–7.46 (m, 3H), 7.38–7.33 (m, 2H), 7.28–7.23 (m, 3H), 7.20–7.14 (m, 4H), 7.00 (d, *J* = 8.4 Hz, 2H), 2.41 (s, 3H); <sup>13</sup>C NMR (100 MHz, CDCl<sub>3</sub>) δ 149.3, 139.2, 134.4, 133.9, 133.1, 132.1, 130.4, 130.0, 129.7, 128.8, 128.6, 128.13, 128.12, 127.8, 118.7, 110.5, 21.2; HRMS (ESI) *m/z*: [M+H]<sup>+</sup> Calcd for C<sub>23</sub>H<sub>18</sub>N<sub>3</sub><sup>+</sup> 336.1495; Found 336.1492.

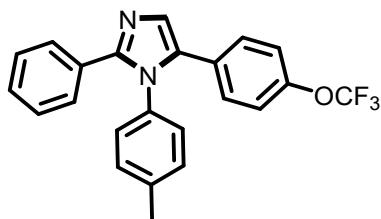

#### 2-Phenyl-1-(*p*-tolyl)-5-(4-(trifluoromethoxy)phenyl)-1*H*-imidazole (4ae)

Purification by column chromatography on silica gel using petroleum ether/ethyl acetate (5:1 v/v) as eluent afforded **4ae** (116.3 mg, yield 59%) as white solid; m.p. 164-166 °C; <sup>1</sup>H NMR (400 MHz, CDCl<sub>3</sub>) δ 7.38–7.33 (m, 3H), 7.26–7.20 (m, 3H), 7.15 (d, *J* = 8.0 Hz, 2H), 7.12–7.05 (m, 4H), 6.98 (d, *J* = 8.4 Hz, 2H), 2.39 (s, 3H); <sup>13</sup>C NMR (100 MHz, CDCl<sub>3</sub>) δ 148.4, 148.3, 138.8, 134.2, 133.7, 130.4, 130.2, 129.6, 128.7, 128.6, 128.4, 128.2, 128.0, 127.9, 120.6, 120.4 (q, *J* = 256.0 Hz, <sup>1</sup>*J*<sub>CF</sub>), 21.2; <sup>19</sup>F NMR (376 MHz, CDCl<sub>3</sub>) δ -57.78; HRMS (ESI) *m/z*: [M+H]<sup>+</sup> Calcd for C<sub>23</sub>H<sub>18</sub>F<sub>3</sub>N<sub>2</sub>O<sup>+</sup> 395.1366; Found 395.1362.

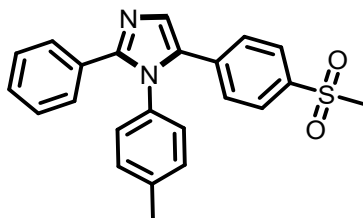

#### 5-(4-(Methylsulfonyl)phenyl)-2-phenyl-1-(*p*-tolyl)-1*H*-imidazole (4af)

Purification by column chromatography on silica gel using petroleum ether/ethyl acetate (2:1 v/v) as eluent afforded **4af** (122.3 mg, yield 63%) as white solid; m.p. 230-232 °C; <sup>1</sup>H NMR (400 MHz, CDCl<sub>3</sub>) δ 7.77 (d, *J* = 8.4 Hz, 2H), 7.48 (s, 1H), 7.36 (d, *J* = 7.2 Hz, 2H), 7.28–7.22 (m, 5H), 7.18 (d, *J* = 8.0 Hz, 2H), 7.00 (d, *J* = 8.0 Hz, 2H), 3.02 (s, 3H), 2.40 (s, 3H); <sup>13</sup>C NMR (100 MHz, CDCl<sub>3</sub>) δ 149.2, 139.0, 138.3, 135.2, 133.8, 132.9, 130.3, 129.9, 129.7, 128.6, 128.3, 128.1, 127.9, 127.6, 127.2, 44.2, 21.1; HRMS (ESI) *m/z*: [M+H]<sup>+</sup> Calcd for C<sub>23</sub>H<sub>21</sub>N<sub>2</sub>O<sub>2</sub>S<sup>+</sup> 389.1318; Found 389.1315.

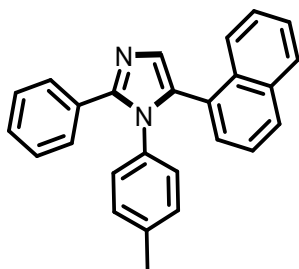

#### 5-(Naphthalen-1-yl)-2-phenyl-1-(*p*-tolyl)-1*H*-imidazole (4ag)

Purification by column chromatography on silica gel using petroleum ether/ethyl acetate (8:1 v/v) as eluent afforded **4ag** (111.7 mg, yield 62%) as yellow solid; m.p. 163-165 °C; <sup>1</sup>H NMR (400 MHz, CDCl<sub>3</sub>) δ 7.96 (s, 1H), 7.80–7.71 (m, 2H), 7.43 (s, 4H), 7.38 (s, 1H), 7.29 (s, 1H), 7.24 (s, 3H), 7.19 (d, *J* = 5.6 Hz, 1H), 6.85 (s, 4H), 2.16 (s, 3H); <sup>13</sup>C NMR (100 MHz, CDCl<sub>3</sub>) δ 147.3, 138.0, 134.2, 133.3, 133.0, 132.6, 130.2, 129.50, 129.46, 129.2, 128.62, 128.57, 128.2, 128.0, 127.2, 127.1, 126.3, 125.8, 125.7, 124.7, 20.9; HRMS (ESI) *m/z*: [M+H]<sup>+</sup> Calcd for C<sub>26</sub>H<sub>21</sub>N<sub>2</sub><sup>+</sup> 361.1699; Found 361.1700.

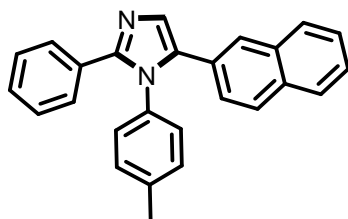

**5-(Naphthalen-2-yl)-2-phenyl-1-(*p*-tolyl)-1*H*-imidazole (4ah)**

Purification by column chromatography on silica gel using petroleum ether/ethyl acetate (8:1 v/v) as eluent afforded **4ah** (108.0 mg, yield 60%) as yellow solid; m.p. 180-182 °C; <sup>1</sup>H NMR (400 MHz, CDCl<sub>3</sub>) δ 7.74 (s, 1H), 7.64 (d, *J* = 8.4 Hz, 2H), 7.60 (s, 1H), 7.46 (s, 1H), 7.44–7.36 (m, 4H), 7.25 (s, 3H), 7.16–7.08 (m, 3H), 7.01 (d, *J* = 7.2 Hz, 2H), 2.35 (s, 3H); <sup>13</sup>C NMR (100 MHz, CDCl<sub>3</sub>) δ 148.2, 138.5, 135.1, 134.6, 133.1, 132.2, 130.7, 130.0, 128.7, 128.5, 128.1, 128.0, 127.9, 127.7, 127.5, 127.3, 127.2, 126.2, 126.1, 21.2; HRMS (ESI) *m/z*: [M+H]<sup>+</sup> Calcd for C<sub>26</sub>H<sub>21</sub>N<sub>2</sub><sup>+</sup> 361.1699; Found 361.1698.

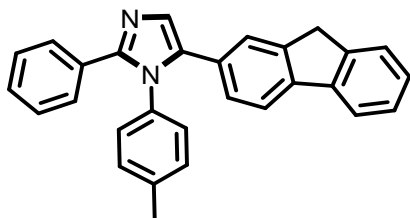

**5-(9*H*-fluoren-2-yl)-2-phenyl-1-(*p*-tolyl)-1*H*-imidazole (4ai)**

Purification by column chromatography on silica gel using petroleum ether/ethyl acetate (5:1 v/v) as eluent afforded **4ai** (99.5 mg, yield 50%) as light yellow solid; m.p. 200-202 °C; <sup>1</sup>H NMR (400 MHz, CDCl<sub>3</sub>) δ 7.71 (d, *J* = 6.8 Hz, 1H), 7.60 (d, *J* = 7.2 Hz, 1H), 7.50 (d, *J* = 6.8 Hz, 1H), 7.40 (d, *J* = 12.4 Hz, 3H), 7.34–7.30 (m, 2H), 7.26 (s, 4H), 7.13 (d, *J* = 6.4 Hz, 2H), 7.02 (s, 3H), 3.80 (s, 2H), 2.37 (s, 3H); <sup>13</sup>C NMR (100 MHz, CDCl<sub>3</sub>) δ 147.7, 143.3, 143.2, 141.1, 140.9, 138.5, 135.5, 134.4, 130.3, 130.0, 128.8, 128.2, 128.1, 128.0, 127.5, 127.3, 126.9, 126.8, 125.2, 125.0, 119.9, 119.5, 36.8, 21.2; HRMS (ESI) *m/z*: [M+H]<sup>+</sup> Calcd for C<sub>29</sub>H<sub>23</sub>N<sub>2</sub><sup>+</sup> 399.1856; Found 399.1860.

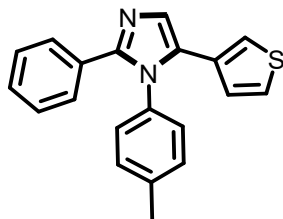

**2-Phenyl-5-(thiophen-3-yl)-1-(*p*-tolyl)-1*H*-imidazole (4aj)**

Purification by column chromatography on silica gel using petroleum ether/ethyl acetate (10:1 v/v) as eluent afforded **4aj** (78.0 mg, yield 52%) as yellow solid; m.p. 210-212 °C; <sup>1</sup>H NMR (400 MHz, CDCl<sub>3</sub>) δ 7.40 (s, 1H), 7.38 (d, *J* = 2.4 Hz, 1H), 7.26–7.19 (m, 7H), 7.09 (d, *J* = 8.0 Hz, 2H), 6.90 (d, *J* = 4.8 Hz, 1H), 6.64 (d, *J* = 2.0 Hz, 1H), 2.43 (s, 3H); <sup>13</sup>C NMR (100 MHz, CDCl<sub>3</sub>) δ 147.6, 139.2, 134.7, 131.1, 130.2, 130.0, 128.5, 128.2, 128.11, 128.08, 127.21, 127.16, 125.3, 121.2, 21.3; HRMS (ESI) *m/z*: [M+H]<sup>+</sup> Calcd for C<sub>20</sub>H<sub>17</sub>N<sub>2</sub>S<sup>+</sup> 317.1107; Found 317.1106.

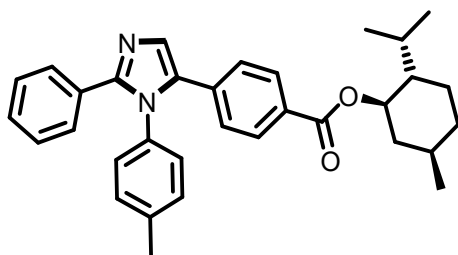**(1*R*,2*R*,5*R*)-2-isopropyl-5-methylcyclohexyl 4-(2-phenyl-1-(*p*-tolyl)-1*H*-imidazol-5-yl)benzoate (4ak)****4-(2-phenyl-1-(*p*-tolyl)-1*H*-imidazol-5-yl)benzoate (4al)**

Purification by column chromatography on silica gel using petroleum ether/ethyl acetate (10:1 v/v) as eluent afforded **4ak** (150.1 mg, yield 61%) as yellow solid; m.p. 188-190 °C; <sup>1</sup>H NMR (400 MHz, CDCl<sub>3</sub>) δ 7.89 (d, *J* = 8.4 Hz, 2H), 7.44 (s, 1H), 7.39–7.33 (m, 2H), 7.27–7.23 (m, 3H), 7.18–7.13 (m, 4H), 7.00 (d, *J* = 8.4 Hz, 2H), 4.95–4.87 (m, 1H), 2.40 (s, 3H), 2.10 (d, *J* = 11.6 Hz, 1H), 1.99–1.90 (m, 1H), 1.72 (d, *J* = 11.6 Hz, 2H), 1.58–1.48 (m, 2H), 1.17–1.04 (m, 2H), 0.94–0.88 (m, 7H), 0.78 (d, *J* = 6.8 Hz, 3H); <sup>13</sup>C NMR (100 MHz, CDCl<sub>3</sub>) δ 165.7, 148.8, 138.8, 134.3, 134.11, 134.05, 130.3, 130.2, 129.5, 129.16, 129.15, 128.7, 128.3, 128.0, 127.8, 127.7, 74.8, 47.2, 40.9, 34.2, 31.4, 26.4, 23.5, 22.0, 21.2, 20.7, 16.4; HRMS (ESI) *m/z*: [M+H]<sup>+</sup> Calcd for C<sub>33</sub>H<sub>37</sub>N<sub>2</sub>O<sub>2</sub><sup>+</sup> 493.2850; Found 493.2846.

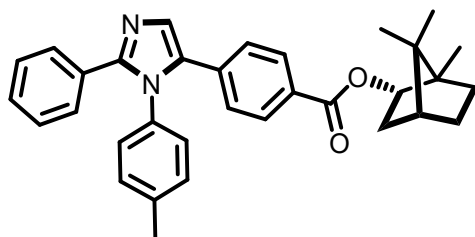**(1*R*,2*R*,4*R*)-1,7,7-trimethylbicyclo[2.2.1]heptan-2-yl 4-(2-phenyl-1-(*p*-tolyl)-1*H*-imidazol-5-yl)benzoate (4al)****4-(2-phenyl-1-(*p*-tolyl)-1*H*-imidazol-5-yl)benzoate (4al)**

Purification by column chromatography on silica gel using petroleum ether/ethyl acetate (8:1 v/v) as eluent afforded **4al** (161.8 mg, yield 66%) as light yellow solid; m.p. 178-180 °C; <sup>1</sup>H NMR (400 MHz, CDCl<sub>3</sub>) δ 7.91 (d, *J* = 8.4 Hz, 2H), 7.44 (s, 1H), 7.38–7.33 (m, 2H), 7.27–7.22 (m, 3H), 7.16 (d, *J* = 8.4 Hz, 4H), 7.01 (d, *J* = 8.4 Hz, 2H), 5.09 (d, *J* = 9.2 Hz, 1H), 2.49–2.43 (m, 1H), 2.40 (s, 3H), 2.15–2.05 (m, 1H), 1.83–1.71 (m, 2H), 1.42–1.26 (m, 2H), 1.12–1.06 (m, 1H), 0.96 (s, 3H), 0.91 (s, 3H), 0.90 (s, 3H); <sup>13</sup>C NMR (100 MHz, CDCl<sub>3</sub>) δ 166.3, 148.8, 138.8, 134.22, 134.16, 134.0, 130.3, 130.2, 129.4, 129.17, 129.16, 128.7, 128.3, 128.0, 127.8, 127.7, 80.5, 49.0, 47.8, 44.9, 36.8, 28.0, 27.3, 21.2, 19.6, 18.8, 13.5; HRMS (ESI) *m/z*: [M+H]<sup>+</sup> Calcd for C<sub>33</sub>H<sub>35</sub>N<sub>2</sub>O<sub>2</sub><sup>+</sup> 491.2693; Found 491.2689.

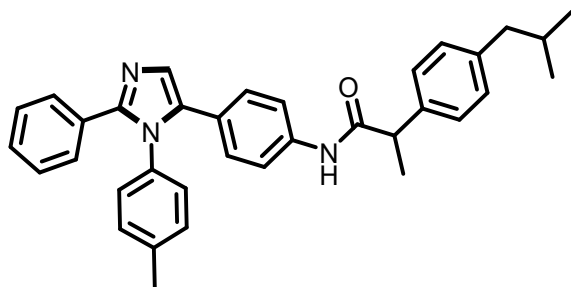

**2-(4-Isobutylphenyl)-N-(4-(2-phenyl-1-(*p*-tolyl)-1*H*-imidazol-5-yl)phenyl)propanamide (4am)**

Purification by column chromatography on silica gel using petroleum ether/ethyl acetate (3:1 v/v) as eluent afforded **4am** (141.2 mg, yield 55%) as light yellow solid; m.p. 210–212 °C; <sup>1</sup>H NMR (400 MHz, CDCl<sub>3</sub>) δ 7.34 (d, *J* = 1.6 Hz, 1H), 7.32 (s, 2H), 7.30 (s, 1H), 7.28 (s, 1H), 7.26 (s, 1H), 7.24–7.21 (m, 4H), 7.16–7.08 (m, 4H), 7.00–6.92 (m, 4H), 3.71–3.64 (m, 1H), 2.46 (d, *J* = 7.2 Hz, 2H), 2.36 (s, 3H), 1.91–1.79 (m, 1H), 1.55 (d, *J* = 7.2 Hz, 3H), 1.26 (s, 1H), 0.91 (s, 3H), 0.89 (s, 3H); <sup>13</sup>C NMR (100 MHz, CDCl<sub>3</sub>) δ 172.6, 147.7, 141.1, 138.7, 137.9, 137.3, 134.7, 134.2, 130.1, 129.8, 128.9, 128.7, 128.3, 128.1, 127.9, 127.4, 127.1, 125.3, 119.3, 47.7, 45.0, 30.1, 22.4, 21.2, 18.4; HRMS (ESI) *m/z*: [M+H]<sup>+</sup> Calcd for C<sub>35</sub>H<sub>36</sub>N<sub>3</sub>O<sup>+</sup> 514.2853; Found 514.2852.

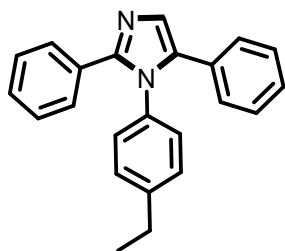

**1-(4-Ethylphenyl)-2,5-diphenyl-1*H*-imidazole (5a)**

Purification by column chromatography on silica gel using petroleum ether/ethyl acetate (8:1 v/v) as eluent afforded **5a** (108.6 mg, yield 67%) as light yellow solid; m.p. 175–177 °C; <sup>1</sup>H NMR (400 MHz, CDCl<sub>3</sub>) δ 7.35 (s, 3H), 7.26–7.19 (m, 6H), 7.15 (d, *J* = 8.0 Hz, 2H), 7.11–7.06 (m, 2H), 7.00 (d, *J* = 8.0 Hz, 2H), 2.67 (q, *J* = 7.6 Hz, 2H), 1.24 (t, *J* = 7.6 Hz, 3H); <sup>13</sup>C NMR (100 MHz, CDCl<sub>3</sub>) δ 148.0, 144.7, 135.1, 134.6, 130.6, 129.9, 128.7, 128.4, 128.2, 128.1, 128.0, 127.2, 28.4, 15.2; HRMS (ESI) *m/z*: [M+H]<sup>+</sup> Calcd for C<sub>23</sub>H<sub>21</sub>N<sub>2</sub><sup>+</sup> 325.1699; Found 325.1700.

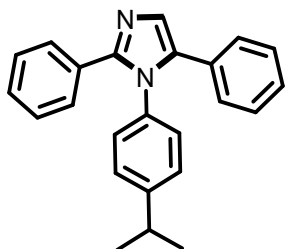

**1-(4-Isopropylphenyl)-2,5-diphenyl-1*H*-imidazole (5b)**

Purification by column chromatography on silica gel using petroleum ether/ethyl acetate (10:1 v/v) as eluent afforded **5b** (104.8 mg yield 62%) as light yellow solid; m.p. 180–182 °C; <sup>1</sup>H NMR (400 MHz, CDCl<sub>3</sub>) δ 7.38–7.33 (m, 3H), 7.26–7.19 (m, 7H), 7.17 (s, 1H), 7.11–7.06 (m, 2H), 7.02 (d, *J*

= 8.4 Hz, 2H), 2.97–2.88 (m, 1H), 1.26 (s, 3H), 1.24 (s, 3H);  $^{13}\text{C}$  NMR (100 MHz,  $\text{CDCl}_3$ )  $\delta$  149.5, 147.9, 135.1, 134.6, 130.4, 129.8, 128.8, 128.4, 128.2, 128.0, 127.8, 127.34, 127.26, 33.7, 23.9; HRMS (ESI)  $m/z$ :  $[\text{M}+\text{H}]^+$  Calcd for  $\text{C}_{24}\text{H}_{23}\text{N}_2^+$  339.1856; Found 339.1855.

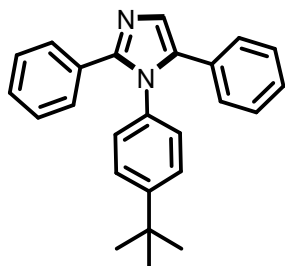

**1-(4-(*Tert*-butyl)phenyl)-2,5-diphenyl-1H-imidazole (5c)**

Purification by column chromatography on silica gel using petroleum ether/ethyl acetate (10:1 v/v) as eluent afforded **5c** (110.9 mg, yield 63%) as light yellow solid; m.p. 197–199 °C;  $^1\text{H}$  NMR (400 MHz,  $\text{CDCl}_3$ )  $\delta$  7.37–7.31 (m, 5H), 7.24–7.18 (m, 6H), 7.10–7.06 (m, 2H), 7.02 (d,  $J$  = 8.4 Hz, 2H), 1.31 (s, 9H);  $^{13}\text{C}$  NMR (100 MHz,  $\text{CDCl}_3$ )  $\delta$  151.8, 148.0, 135.1, 134.4, 130.6, 129.9, 128.7, 128.3, 128.1, 128.0, 127.9, 127.7, 127.2, 126.2, 34.7, 31.2; HRMS (ESI)  $m/z$ :  $[\text{M}+\text{H}]^+$  Calcd for  $\text{C}_{25}\text{H}_{25}\text{N}_2^+$  353.2012; Found 353.2010.

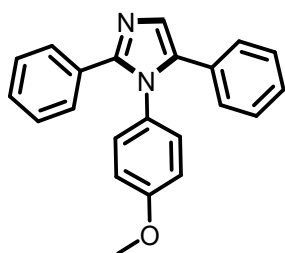

**1-(4-Methoxyphenyl)-2,5-diphenyl-1H-imidazole (5d)**

Purification by column chromatography on silica gel using petroleum ether/ethyl acetate (8:1 v/v) as eluent afforded **5d** (104.4 mg, yield 64%) as light yellow solid; m.p. 210–212 °C;  $^1\text{H}$  NMR (400 MHz,  $\text{CDCl}_3$ )  $\delta$  7.40–7.33 (m, 3H), 7.26–7.18 (m, 6H), 7.10 (s, 2H), 7.00 (d,  $J$  = 8.4 Hz, 2H), 6.82 (d,  $J$  = 8.4 Hz, 2H), 3.78 (s, 3H);  $^{13}\text{C}$  NMR (100 MHz,  $\text{CDCl}_3$ )  $\delta$  159.2, 148.0, 135.1, 130.6, 129.80, 129.78, 129.2, 128.6, 128.3, 128.1, 128.0, 127.9, 127.2, 114.4, 55.3; HRMS (ESI)  $m/z$ :  $[\text{M}+\text{H}]^+$  Calcd for  $\text{C}_{22}\text{H}_{19}\text{N}_2\text{O}^+$  327.1492; Found 327.1491.

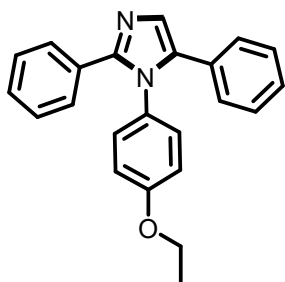

**1-(4-Ethoxyphenyl)-2,5-diphenyl-1H-imidazole (5e)**

Purification by column chromatography on silica gel using petroleum ether/ethyl acetate (10:1 v/v) as eluent afforded **5e** (103.7 mg, yield 61%) as white solid; m.p. 173–175 °C;  $^1\text{H}$  NMR (400 MHz,

CDCl<sub>3</sub>)  $\delta$  7.40–7.33 (m, 3H), 7.26–7.18 (m, 6H), 7.13–7.07 (m, 2H), 7.00 (d,  $J$  = 8.8 Hz, 2H), 6.82 (d,  $J$  = 8.8 Hz, 2H), 4.01 (q,  $J$  = 7.2 Hz, 2H), 1.42 (t,  $J$  = 7.2 Hz, 3H); <sup>13</sup>C NMR (100 MHz, CDCl<sub>3</sub>)  $\delta$  158.7, 148.1, 135.2, 130.7, 129.9, 129.7, 129.2, 128.7, 128.3, 128.2, 128.0, 127.2, 114.9, 63.6, 14.7; HRMS (ESI)  $m/z$ : [M+H]<sup>+</sup> Calcd for C<sub>23</sub>H<sub>21</sub>N<sub>2</sub>O<sup>+</sup> 341.1648; Found 341.1644.

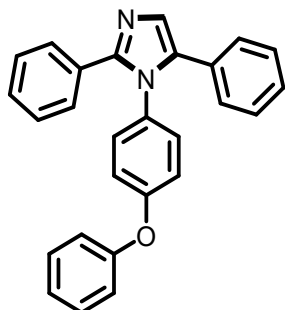

**1-(4-Phenoxyphenyl)-2,5-diphenyl-1H-imidazole (5f)**

Purification by column chromatography on silica gel using petroleum ether/ethyl acetate (10:1 v/v) as eluent afforded **5f** (114.5 mg, yield 59%) as light yellow solid; m.p. 220–222 °C; <sup>1</sup>H NMR (400 MHz, CDCl<sub>3</sub>)  $\delta$  7.43–7.33 (m, 5H), 7.30–7.24 (m, 6H), 7.17–7.10 (m, 3H), 7.08–6.99 (m, 4H), 6.97–6.92 (m, 2H); <sup>13</sup>C NMR (100 MHz, CDCl<sub>3</sub>)  $\delta$  157.4, 156.2, 148.0, 135.2, 131.8, 130.3, 129.9, 129.7, 129.6, 128.8, 128.5, 128.35, 128.29, 128.1, 127.8, 127.5, 124.1, 119.3, 119.0; HRMS (ESI)  $m/z$ : [M+H]<sup>+</sup> Calcd for C<sub>27</sub>H<sub>21</sub>N<sub>2</sub>O<sup>+</sup> 389.1648; Found 389.1647.

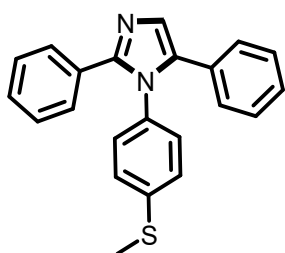

**1-(4-(Methylthio)phenyl)-2,5-diphenyl-1H-imidazole (5g)**

Purification by column chromatography on silica gel using petroleum ether/ethyl acetate (8:1 v/v) as eluent afforded **5g** (102.6 mg, yield 60%) as white solid; m.p. 217–219 °C; <sup>1</sup>H NMR (400 MHz, CDCl<sub>3</sub>)  $\delta$  7.34 (s, 3H), 7.28–7.20 (m, 6H), 7.15 (d,  $J$  = 8.0 Hz, 2H), 7.09 (d,  $J$  = 4.0 Hz, 2H), 6.99 (d,  $J$  = 8.0 Hz, 2H), 2.46 (s, 3H); <sup>13</sup>C NMR (100 MHz, CDCl<sub>3</sub>)  $\delta$  147.9, 139.5, 135.0, 133.7, 130.4, 129.7, 128.7, 128.41, 128.36, 128.24, 128.15, 128.09, 128.06, 127.3, 126.3, 15.2; HRMS (ESI)  $m/z$ : [M+H]<sup>+</sup> Calcd for C<sub>22</sub>H<sub>19</sub>N<sub>2</sub>S<sup>+</sup> 343.1263; Found 343.1262.

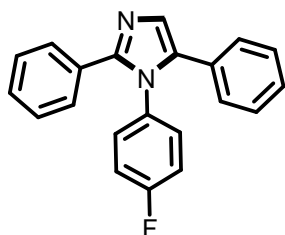

**1-(4-Fluorophenyl)-2,5-diphenyl-1H-imidazole (5h)**

Purification by column chromatography on silica gel using petroleum ether/ethyl acetate (8:1 v/v) as eluent afforded **5h** (103.7 mg, yield 66%) as white solid; m.p. 130-132 °C; <sup>1</sup>H NMR (400 MHz, CDCl<sub>3</sub>, CF<sub>3</sub>COOD) δ 7.66 (s, 1H), 7.41 (s, 3H), 7.39–7.28(m, 5H), 7.19–7.06 (m, 6H); <sup>13</sup>C NMR (100 MHz, CDCl<sub>3</sub>, CF<sub>3</sub>COOD) δ 162.9 (d, *J* = 251.0 Hz, <sup>1</sup>*J*<sub>CF</sub>), 145.2, 135.7, 131.5, 129.7 (d, *J* = 9.0 Hz, <sup>3</sup>*J*<sub>CF</sub>), 129.62, 129.56, 129.2, 129.1, 129.0, 128.7, 125.8, 123.0, 119.3, 117.2 (d, *J* = 23.0 Hz, <sup>2</sup>*J*<sub>CF</sub>); <sup>19</sup>F NMR (376 MHz, CDCl<sub>3</sub>, CF<sub>3</sub>COOD) -109.21. HRMS (ESI) *m/z*: [M+H]<sup>+</sup> Calcd for C<sub>21</sub>H<sub>16</sub>FN<sub>2</sub><sup>+</sup> 315.1292; Found 315.1289.

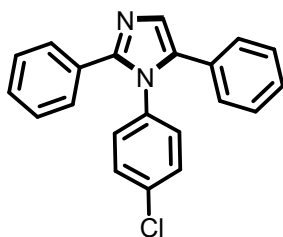

**1-(4-Chlorophenyl)-2,5-diphenyl-1H-imidazole (5i)**

Purification by column chromatography on silica gel using petroleum ether/ethyl acetate (8:1 v/v) as eluent afforded **5i** (102.3 mg, yield 62%) as light yellow solid; m.p. 220-222 °C; <sup>1</sup>H NMR (400 MHz, CDCl<sub>3</sub>) δ 7.36–7.30 (m, 4H), 7.29–7.23 (m, 7H), 7.10–7.05 (m, 2H), 7.02 (d, *J* = 8.4 Hz, 2H); <sup>13</sup>C NMR (100 MHz, CDCl<sub>3</sub>) δ 147.9, 135.6, 134.9, 134.3, 130.2, 129.6, 129.4, 128.8, 128.5, 128.4, 128.3, 128.2, 127.5; HRMS (ESI) *m/z*: [M+H]<sup>+</sup> Calcd for C<sub>21</sub>H<sub>16</sub>ClN<sub>2</sub><sup>+</sup> 331.0997; Found 331.0996.

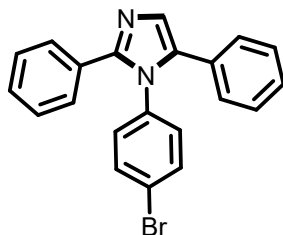

**1-(4-Bromophenyl)-2,5-diphenyl-1H-imidazole (5j)**

Purification by column chromatography on silica gel using petroleum ether/ethyl acetate (10:1 v/v) as eluent afforded **5j** (121.6 mg, yield 65%) as light yellow solid; m.p. 208-210 °C; <sup>1</sup>H NMR (400 MHz, CDCl<sub>3</sub>) δ 7.45–7.40 (m, 2H), 7.35–7.30 (m, 3H), 7.27–7.21 (m, 6H), 7.08–7.04 (m, 2H), 6.93 (d, *J* = 8.8 Hz, 2H); <sup>13</sup>C NMR (100 MHz, CDCl<sub>3</sub>) δ 147.8, 136.1, 134.8, 132.5, 130.2, 129.6, 129.3, 128.7, 128.4, 128.35, 128.28, 128.1, 127.4, 122.3; HRMS (ESI) *m/z*: [M+H]<sup>+</sup> Calcd for C<sub>21</sub>H<sub>16</sub>BrN<sub>2</sub><sup>+</sup> 375.0491; Found 375.0490.

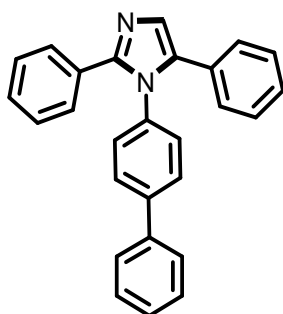

**1-([1,1'-Biphenyl]-4-yl)-2,5-diphenyl-1H-imidazole (5k)**

Purification by column chromatography on silica gel using petroleum ether/ethyl acetate (8:1 v/v) as eluent afforded **5k** (107.9 mg, yield 58%) as light yellow solid; m.p. 246-248 °C; <sup>1</sup>H NMR (400 MHz, CDCl<sub>3</sub>) δ 7.63–7.54 (m, 4H), 7.28–7.20 (m, 6H), 7.47–7.34 (m, 6H), 7.15 (d, *J* = 8.8 Hz, 4H); <sup>13</sup>C NMR (100 MHz, CDCl<sub>3</sub>) δ 147.9, 141.1, 139.4, 136.1, 135.1, 130.4, 129.7, 128.9, 128.8, 128.5, 128.3, 128.1, 127.9, 127.8, 127.4, 126.9; HRMS (ESI) *m/z*: [M+H]<sup>+</sup> Calcd for C<sub>27</sub>H<sub>21</sub>N<sub>2</sub><sup>+</sup> 373.1699; Found 373.1697.

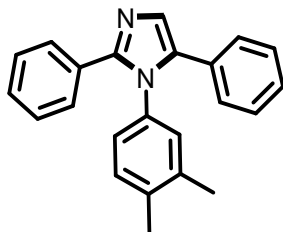

**1-(3,4-Dimethylphenyl)-2,5-diphenyl-1H-imidazole (5l)**

Purification by column chromatography on silica gel using petroleum ether/ethyl acetate (10:1 v/v) as eluent afforded **5l** (105.4 mg, yield 65%) as white solid; m.p. 211-213 °C; <sup>1</sup>H NMR (400 MHz, CDCl<sub>3</sub>) δ 7.40–7.33 (m, 3H), 7.25–7.18 (m, 6H), 7.11–7.04 (m, 3H), 6.88–6.81 (m, 2H), 2.26 (s, 3H), 2.14 (s, 3H); <sup>13</sup>C NMR (100 MHz, CDCl<sub>3</sub>) δ 147.9, 137.8, 137.1, 135.1, 134.7, 130.7, 130.3, 130.0, 128.9, 128.6, 128.3, 128.1, 127.99, 127.95, 127.9, 127.1, 125.4, 19.7, 19.5; HRMS (ESI) *m/z*: [M+H]<sup>+</sup> Calcd for C<sub>23</sub>H<sub>21</sub>N<sub>2</sub><sup>+</sup> 325.1699; Found 325.1698.

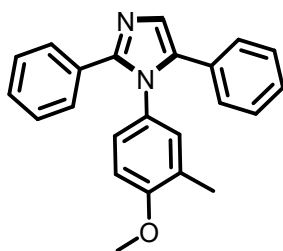

**1-(4-Methoxy-3-methylphenyl)-2,5-diphenyl-1H-imidazole (5m)**

Purification by column chromatography on silica gel using petroleum ether/ethyl acetate (10:1 v/v) as eluent afforded **5m** (103.7 mg, yield 61%) as white solid; m.p. 164-166 °C; <sup>1</sup>H NMR (400 MHz, CDCl<sub>3</sub>) δ 7.41–7.36 (m, 2H), 7.34 (s, 1H), 7.25–7.17 (m, 6H), 7.13–7.07 (m, 2H), 6.93–6.87 (m, 2H), 6.73 (d, *J* = 8.4 Hz, 1H), 3.83 (s, 3H), 2.12 (s, 3H); <sup>13</sup>C NMR (100 MHz, CDCl<sub>3</sub>) δ 157.5, 148.1, 135.2, 130.8, 130.04, 130.02, 129.4, 128.6, 128.3, 128.2, 128.0, 127.9, 127.8, 127.1, 126.5, 110.0, 55.4, 16.1; HRMS (ESI) *m/z*: [M+H]<sup>+</sup> Calcd for C<sub>23</sub>H<sub>21</sub>N<sub>2</sub>O<sup>+</sup> 341.1648; Found 341.1647.

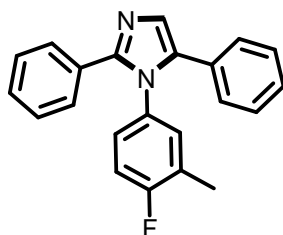

**1-(4-Fluoro-3-methylphenyl)-2,5-diphenyl-1H-imidazole (5n)**

Purification by column chromatography on silica gel using petroleum ether/ethyl acetate (10:1 v/v) as eluent afforded **5n** (103.4 mg, yield 63%) as white solid; m.p. 221-223 °C; <sup>1</sup>H NMR (400 MHz, CDCl<sub>3</sub>) δ 7.35 (d, *J* = 8.0 Hz, 3H), 7.27–7.20 (m, 6H), 7.12–7.06 (m, 2H), 6.99–6.87 (m, 3H), 2.17 (s, 3H); <sup>13</sup>C NMR (100 MHz, CDCl<sub>3</sub>) δ 160.7 (d, *J* = 246.0 Hz, <sup>1</sup>*J*<sub>CF</sub>), 159.4, 148.0, 135.1, 132.9 (d, *J* = 2.0 Hz, <sup>4</sup>*J*<sub>CF</sub>), 131.0 (d, *J* = 5.0 Hz, <sup>3</sup>*J*<sub>CF</sub>), 130.5, 129.7, 128.6, 128.4, 128.2, 128.1 (d, *J* = 4.0 Hz, <sup>3</sup>*J*<sub>CF</sub>), 128.0, 127.3, 127.1 (d, *J* = 9.0 Hz, <sup>3</sup>*J*<sub>CF</sub>), 126.3 (d, *J* = 18.0 Hz, <sup>2</sup>*J*<sub>CF</sub>), 115.8 (d, *J* = 23.0 Hz, <sup>2</sup>*J*<sub>CF</sub>), 14.45, 14.43; <sup>19</sup>F NMR (376 MHz, CDCl<sub>3</sub>) -116.32; HRMS (ESI) *m/z*: [M+H]<sup>+</sup> Calcd for C<sub>22</sub>H<sub>18</sub>FN<sub>2</sub><sup>+</sup> 329.1449; Found 329.1446.

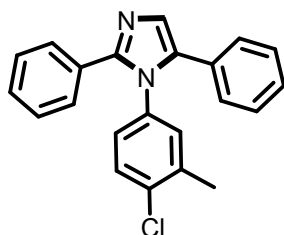

**1-(4-Chloro-3-methylphenyl)-2,5-diphenyl-1H-imidazole (5o)**

Purification by column chromatography on silica gel using petroleum ether/ethyl acetate (8:1 v/v) as eluent afforded **5o** (103.2 mg, yield 60%) as light yellow solid; m.p. 214-216 °C; <sup>1</sup>H NMR (400 MHz, CDCl<sub>3</sub>) δ 7.36–7.33 (m, 3H), 7.28–7.22 (m, 7H), 7.09–7.06 (m, 2H), 6.95 (d, *J* = 2.4 Hz, 1H), 6.89–6.84 (m, 1H), 2.26 (s, 3H); <sup>13</sup>C NMR (100 MHz, CDCl<sub>3</sub>) δ 147.9, 137.5, 135.5, 134.9, 134.4, 130.32, 130.28, 129.8, 129.5, 128.7, 128.4, 128.29, 128.27, 128.2, 128.1, 127.4, 126.8, 20.0; HRMS (ESI) *m/z*: [M+H]<sup>+</sup> Calcd for C<sub>22</sub>H<sub>18</sub>ClN<sub>2</sub><sup>+</sup> 345.1153; Found 345.1152.

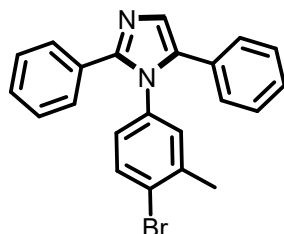

**1-(4-Bromo-3-methylphenyl)-2,5-diphenyl-1H-imidazole (5p)**

Purification by column chromatography on silica gel using petroleum ether/ethyl acetate (10:1 v/v) as eluent afforded **5p** (128.1 mg, yield 66%) as light yellow solid; m.p. 212-214 °C; <sup>1</sup>H NMR (400 MHz, CDCl<sub>3</sub>) δ 7.47 (d, *J* = 8.4 Hz, 1H), 7.37–7.32 (m, 3H), 7.27–7.21 (m, 6H), 7.10–7.06 (m, 2H), 6.95 (d, *J* = 2.0 Hz, 1H), 6.81–6.76 (m, 1H), 2.28 (s, 3H); <sup>13</sup>C NMR (100 MHz, CDCl<sub>3</sub>) δ 147.8, 139.4, 136.2, 134.9, 133.1, 130.3, 130.1, 129.5, 128.7, 128.4, 128.3, 128.2, 128.1, 127.4, 127.0, 124.8, 22.9; HRMS (ESI) *m/z*: [M+H]<sup>+</sup> Calcd for C<sub>22</sub>H<sub>18</sub>BrN<sub>2</sub><sup>+</sup> 389.0648; Found 389.0642.

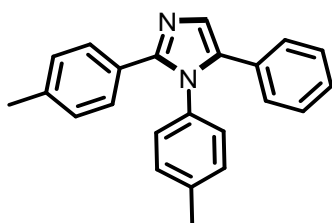

**5-Phenyl-1,2-di-p-tolyl-1H-imidazole (5q)**

Purification by column chromatography on silica gel using petroleum ether/ethyl acetate (8:1 v/v) as eluent afforded **5q** (76.2 mg, yield 47%) as light yellow solid; m.p. 160-162 °C; <sup>1</sup>H NMR (400 MHz, CDCl<sub>3</sub>) δ 7.33 (s, 1H), 7.26 (s, 1H), 7.23 (s, 1H), 7.22–7.19 (m, 3H), 7.13 (s, 1H), 7.11 (s, 1H), 7.10–7.06 (m, 2H), 7.04 (d, *J* = 8.0 Hz, 2H), 6.98 (d, *J* = 8.4 Hz, 2H), 2.37 (s, 3H), 2.30 (s, 3H); <sup>13</sup>C NMR (100 MHz, CDCl<sub>3</sub>) δ 148.1, 138.4, 138.0, 134.9, 134.6, 130.0, 128.8, 128.6, 128.4, 128.2, 128.0, 127.8, 127.7, 127.2, 21.22, 21.21; HRMS (ESI) *m/z*: [M+H]<sup>+</sup> Calcd for C<sub>23</sub>H<sub>21</sub>N<sub>2</sub><sup>+</sup> 325.1699; Found 325.1703.

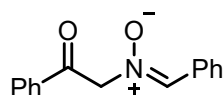

**(Z)-N-(2-oxo-2-phenylethyl)-1-phenylmethanimine oxide (6)**: (Orange solid, 454.1 mg, yield 95%); m.p. 97-99 °C; <sup>1</sup>H NMR (400 MHz, CDCl<sub>3</sub>) δ 8.22–8.17 (m, 2H), 7.91–7.86 (m, 2H), 7.57–7.51 (m, 1H), 7.45 (s, 1H), 7.41–7.32 (m, 5H), 5.37 (s, 2H); <sup>13</sup>C NMR (100 MHz, CDCl<sub>3</sub>) δ 190.2, 137.3, 134.3, 133.9, 130.4, 129.9, 128.6, 128.4, 128.1, 127.9, 71.9; HRMS (ESI) *m/z*: [M+H]<sup>+</sup> Calcd for C<sub>15</sub>H<sub>14</sub>NO<sub>2</sub><sup>+</sup> 240.1019; Found 240.1018.

## 7. Copies of $^1\text{H}$ NMR, $^{13}\text{C}$ NMR and $^{19}\text{F}$ NMR spectra

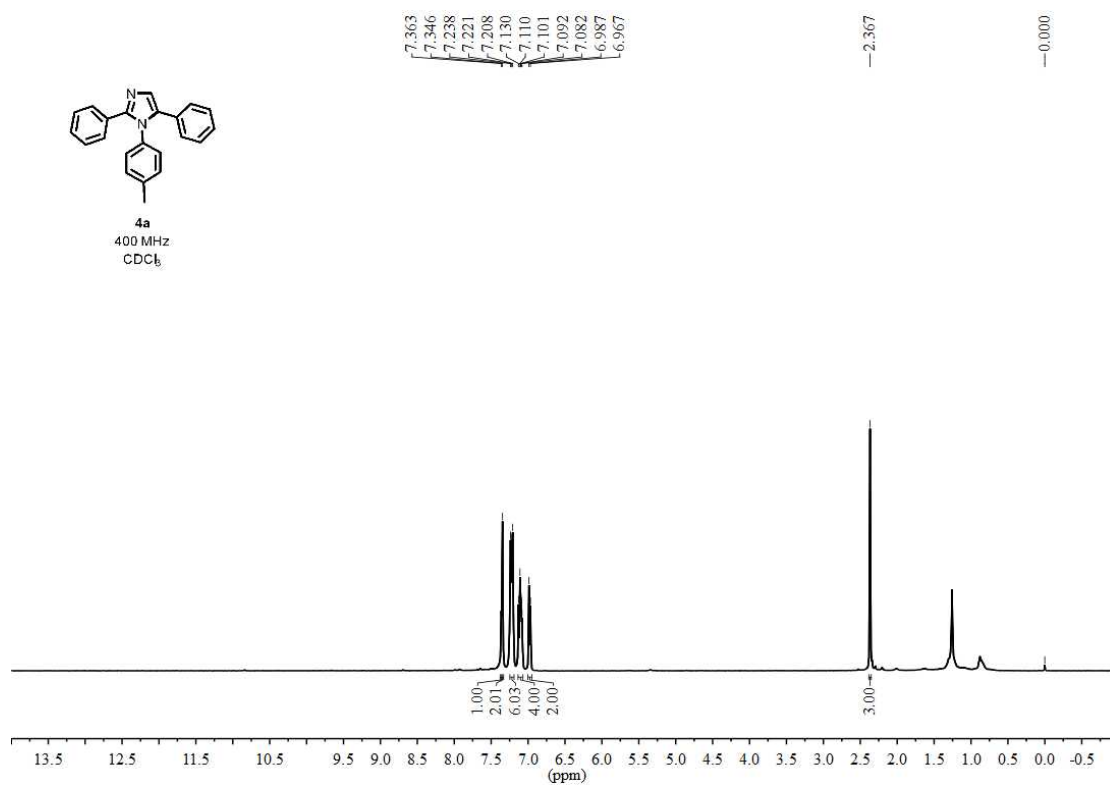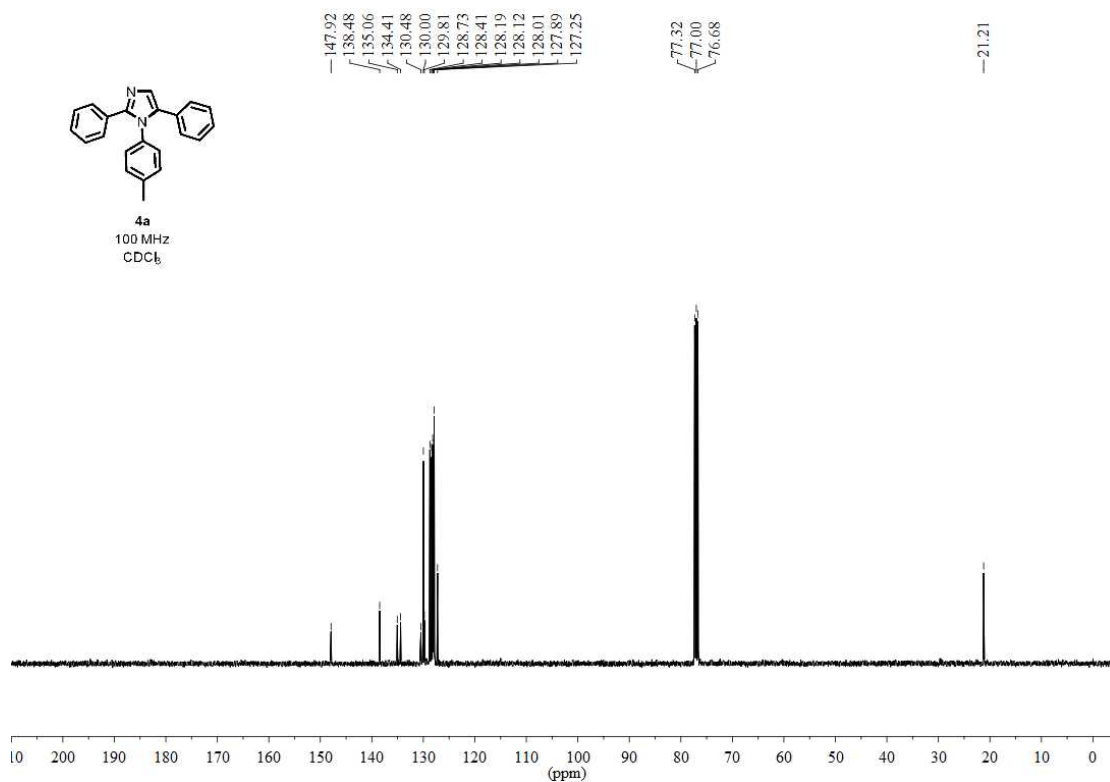

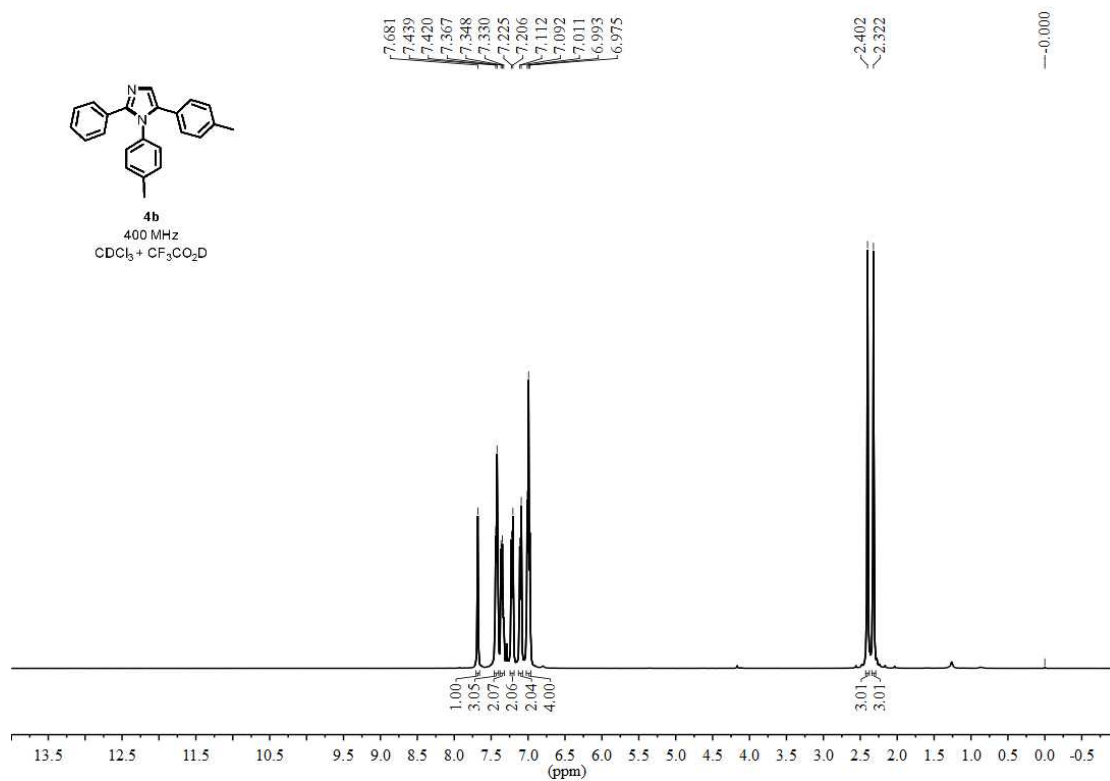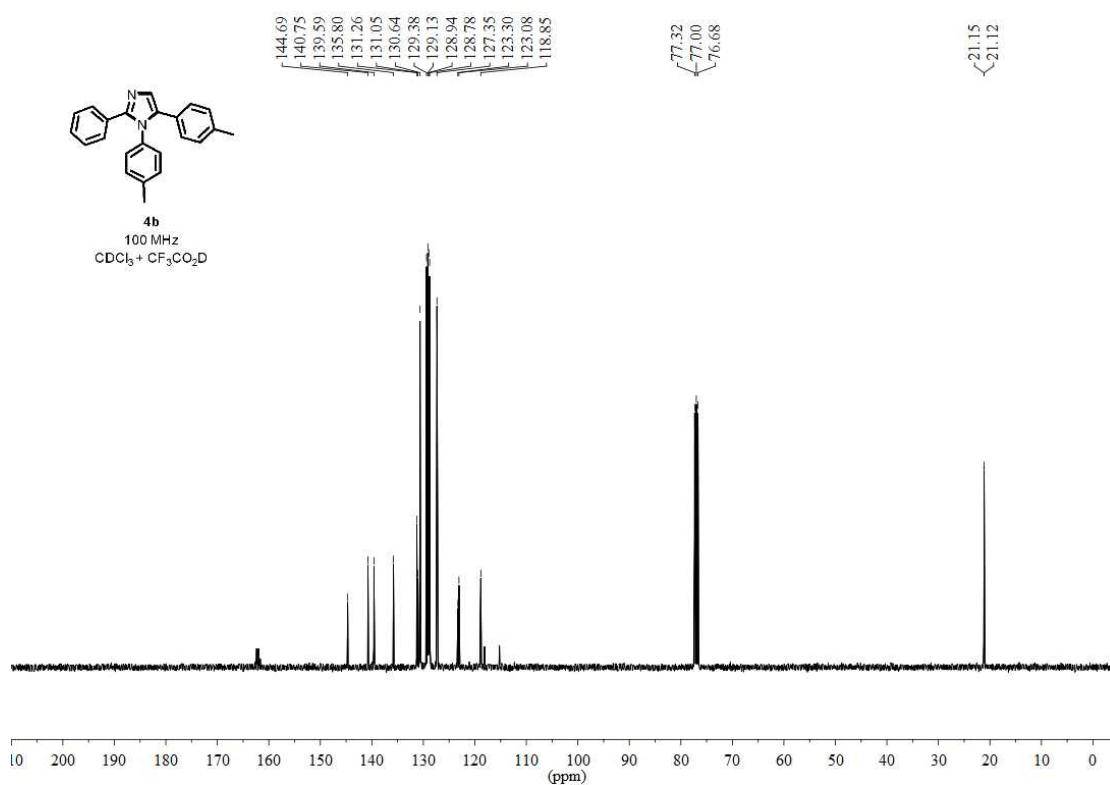

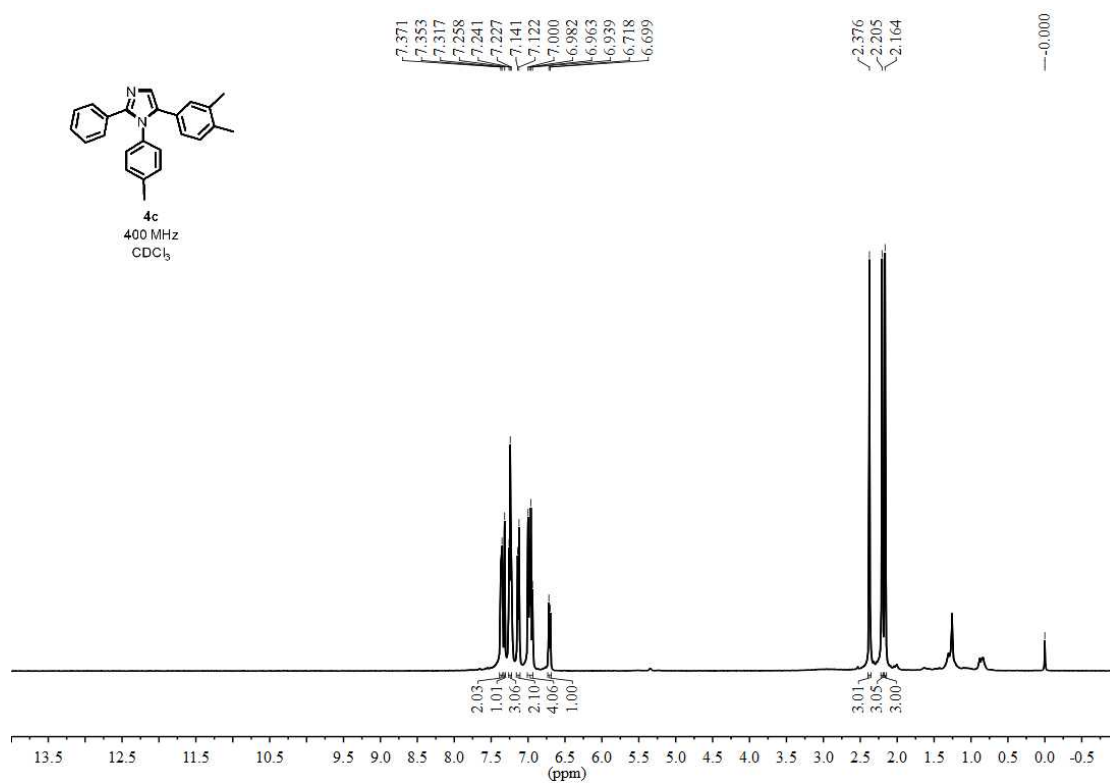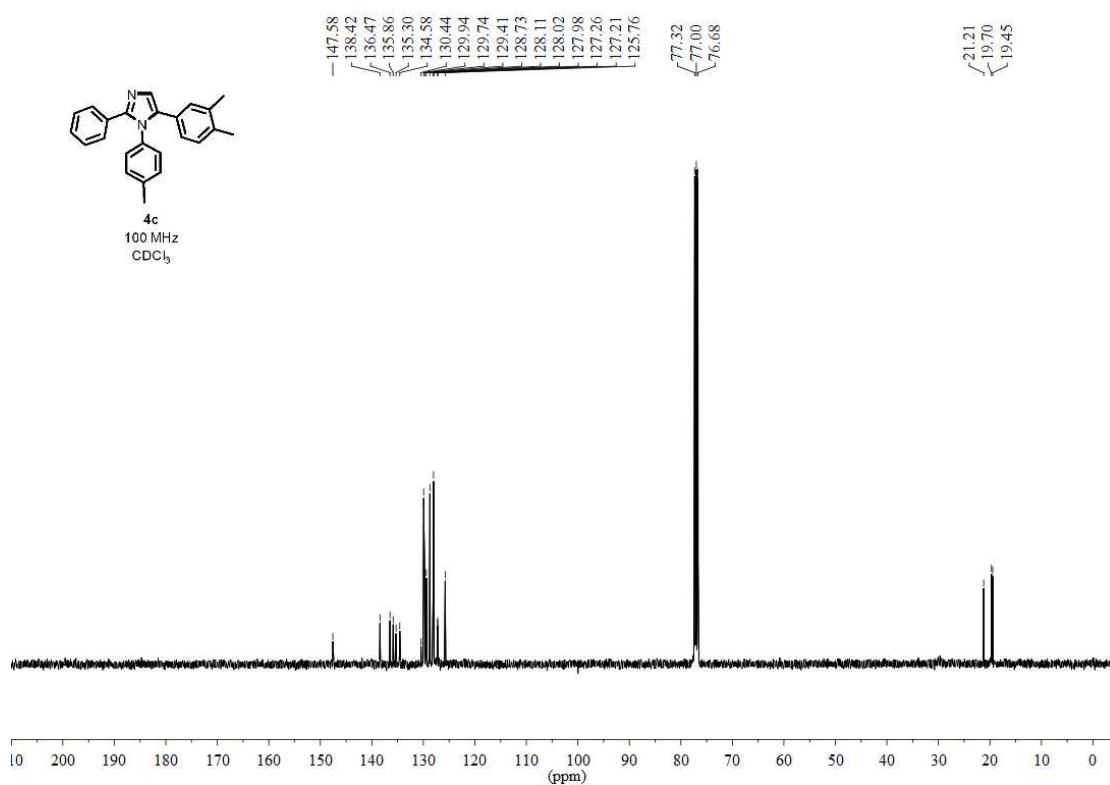

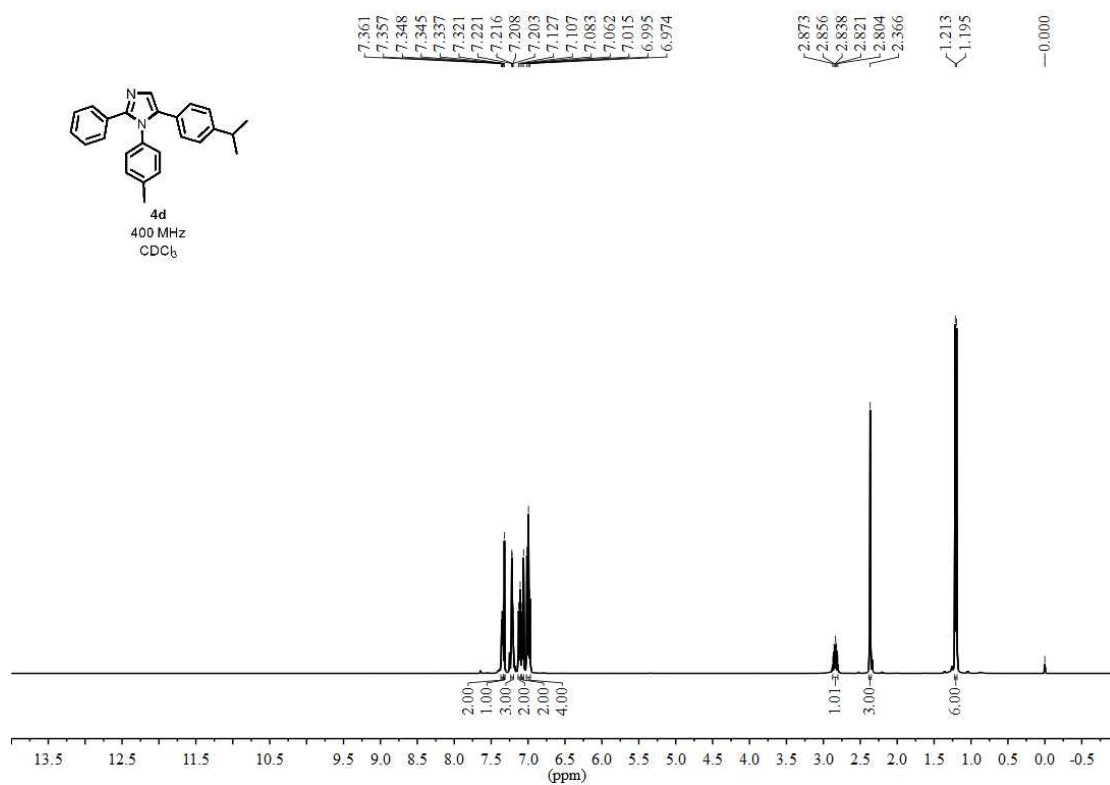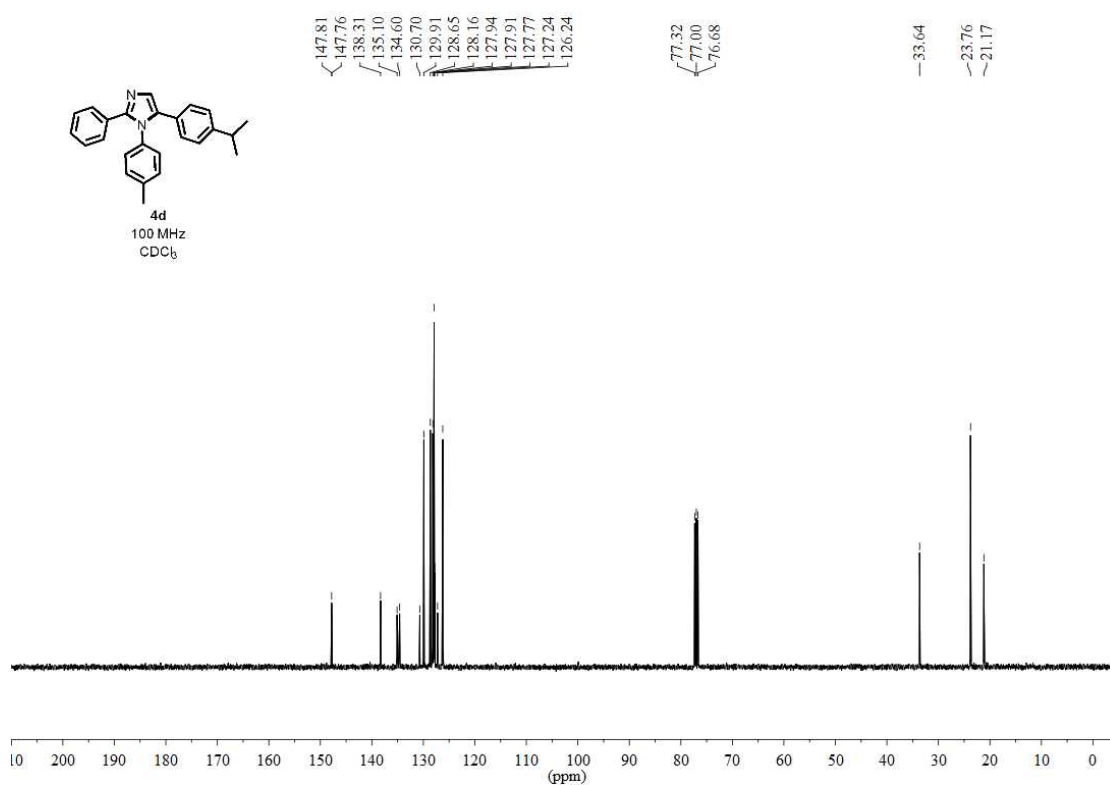

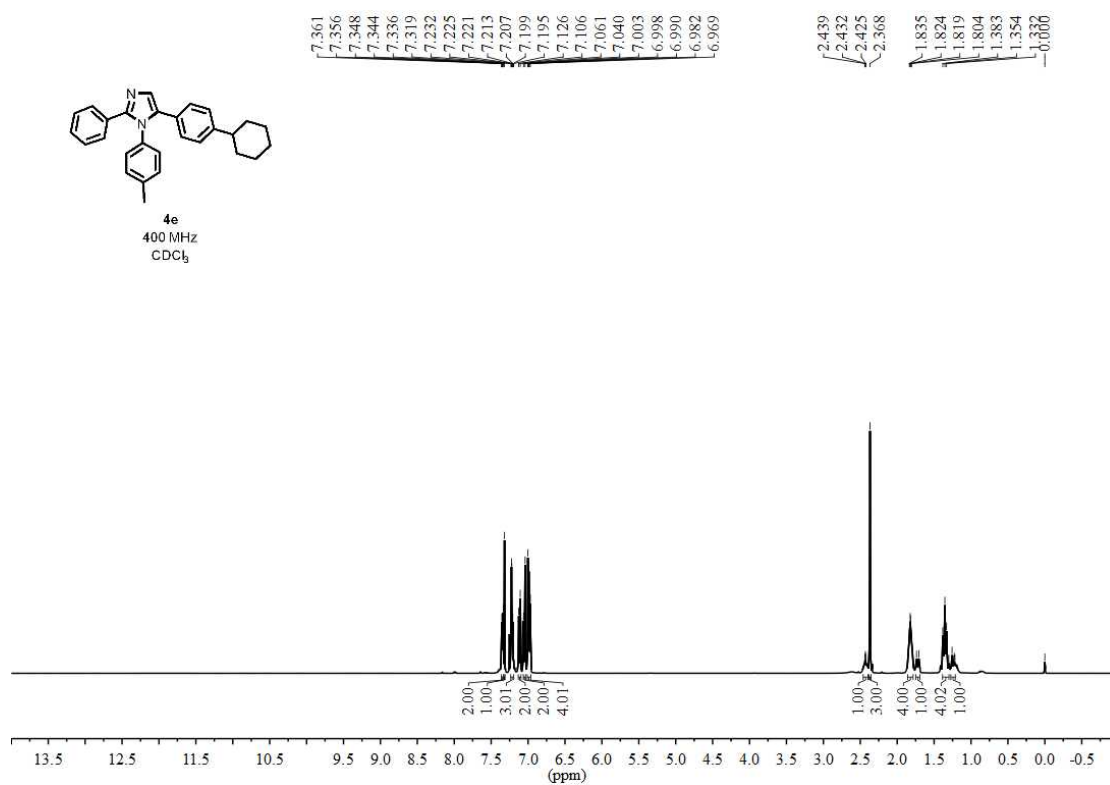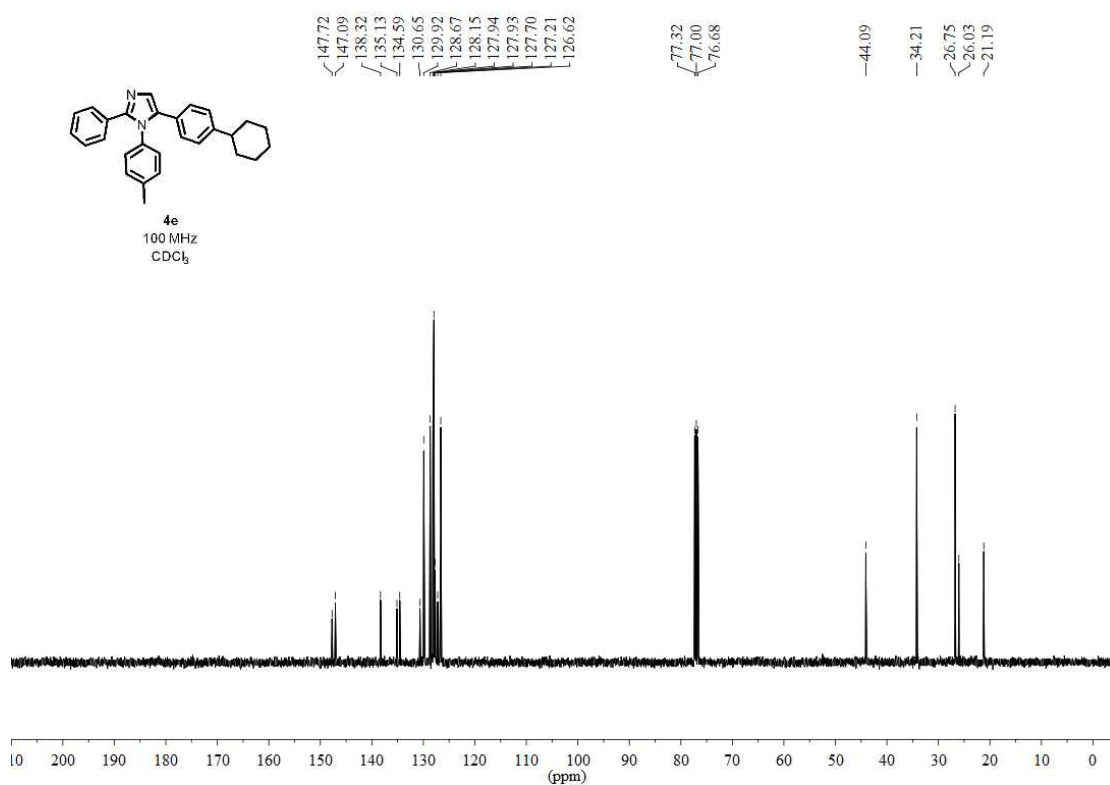

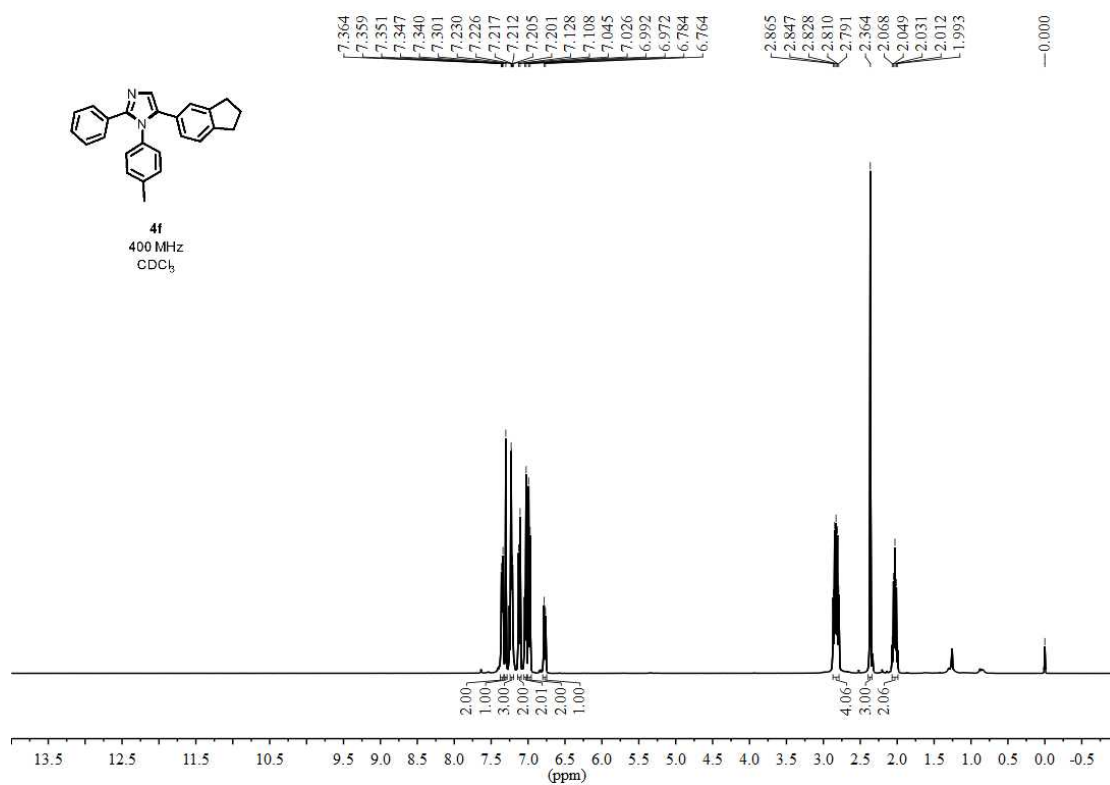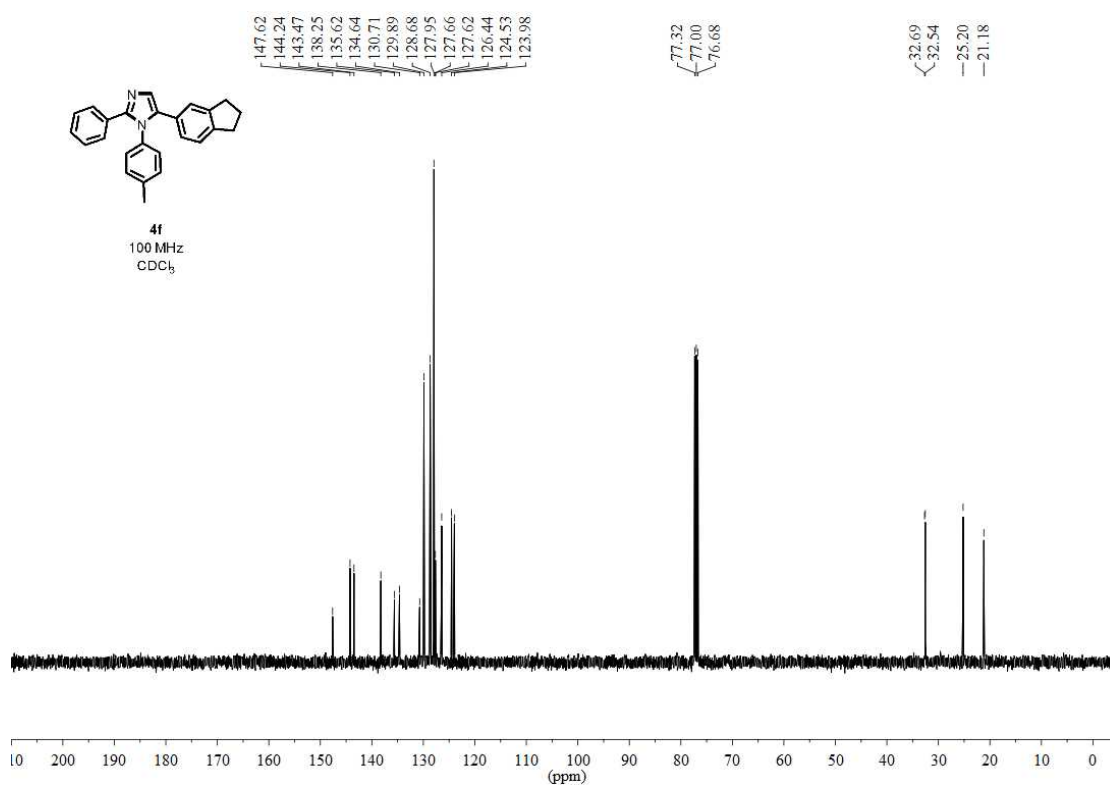

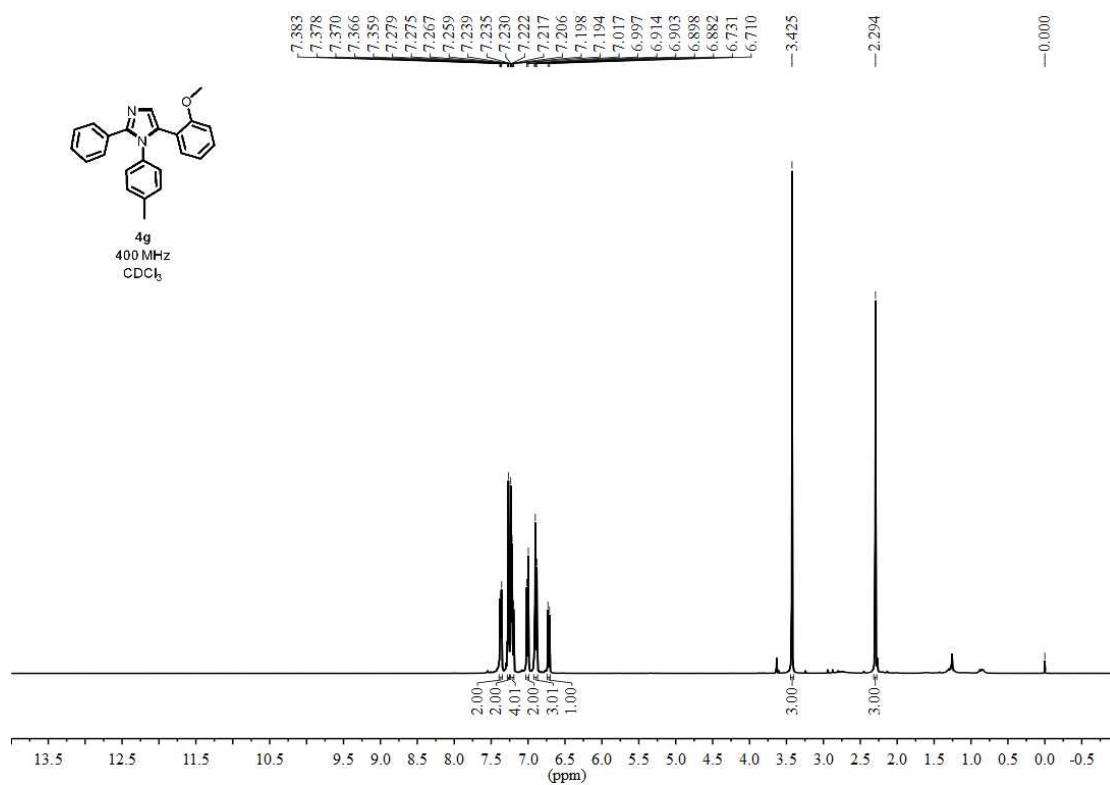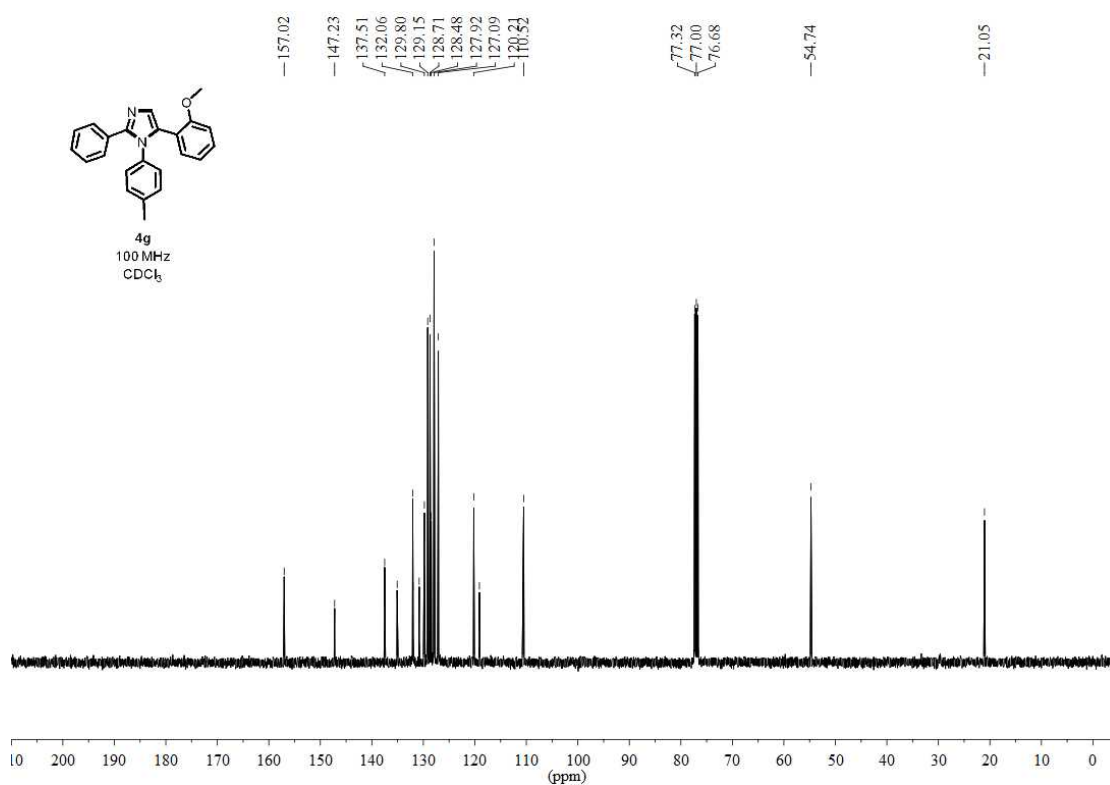

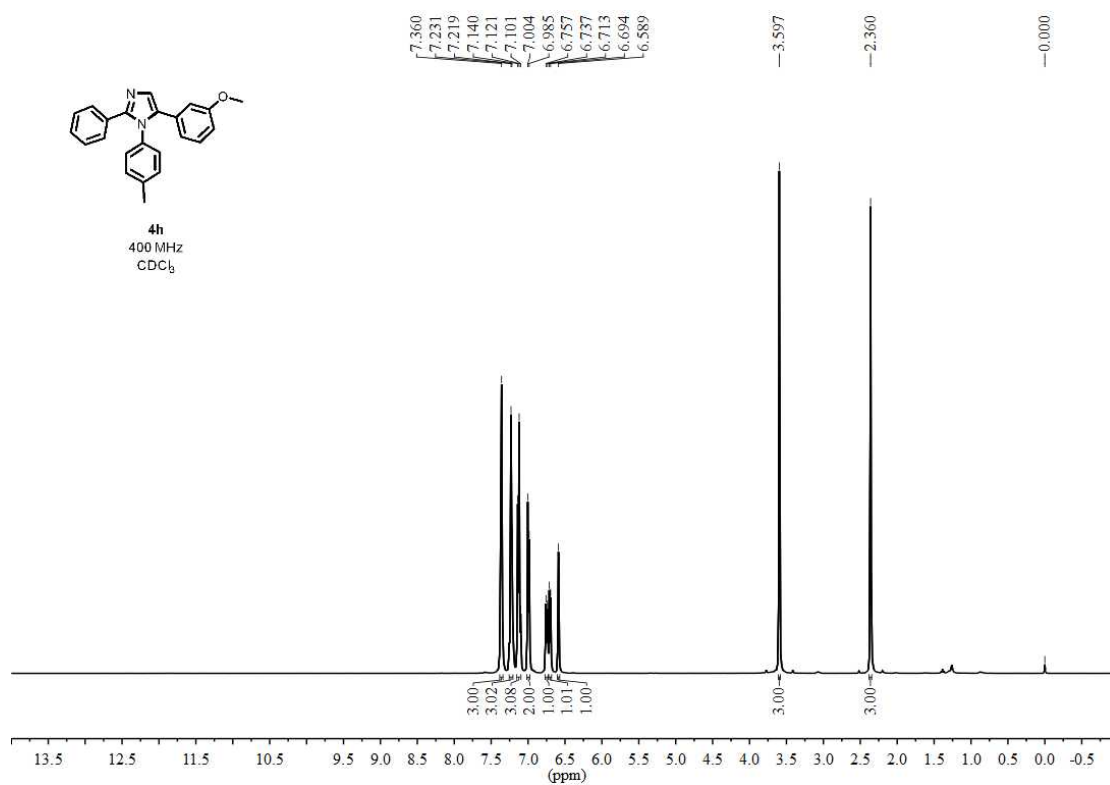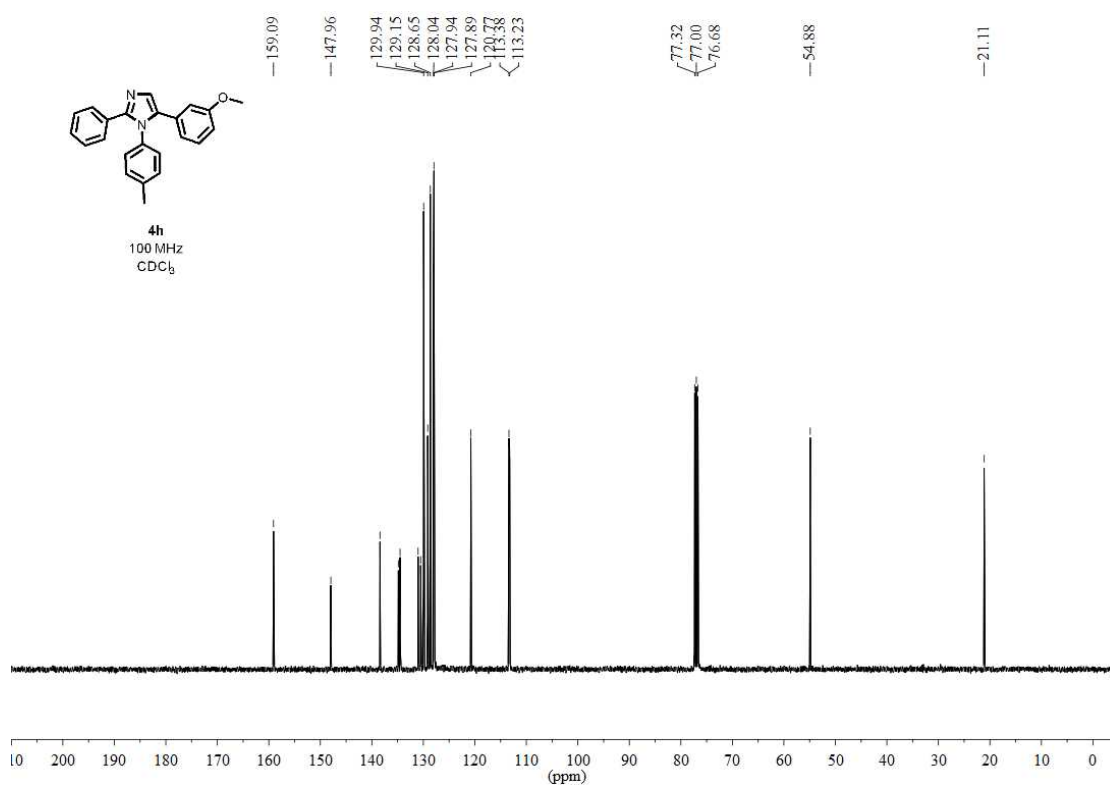

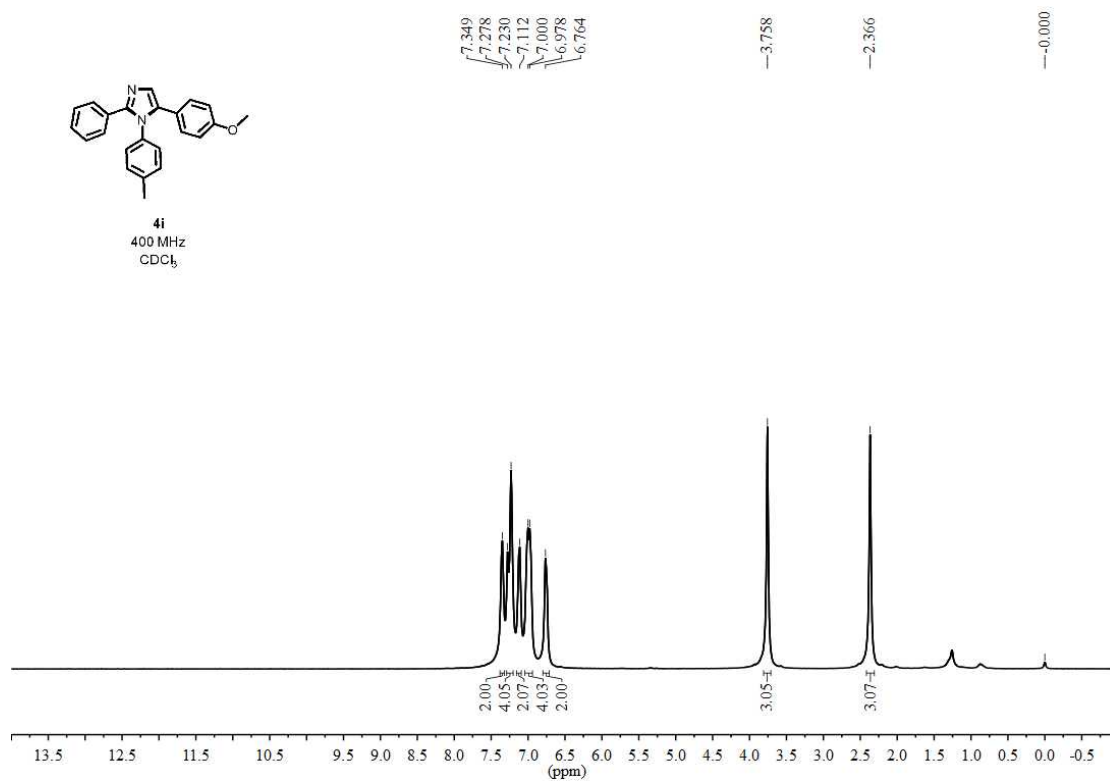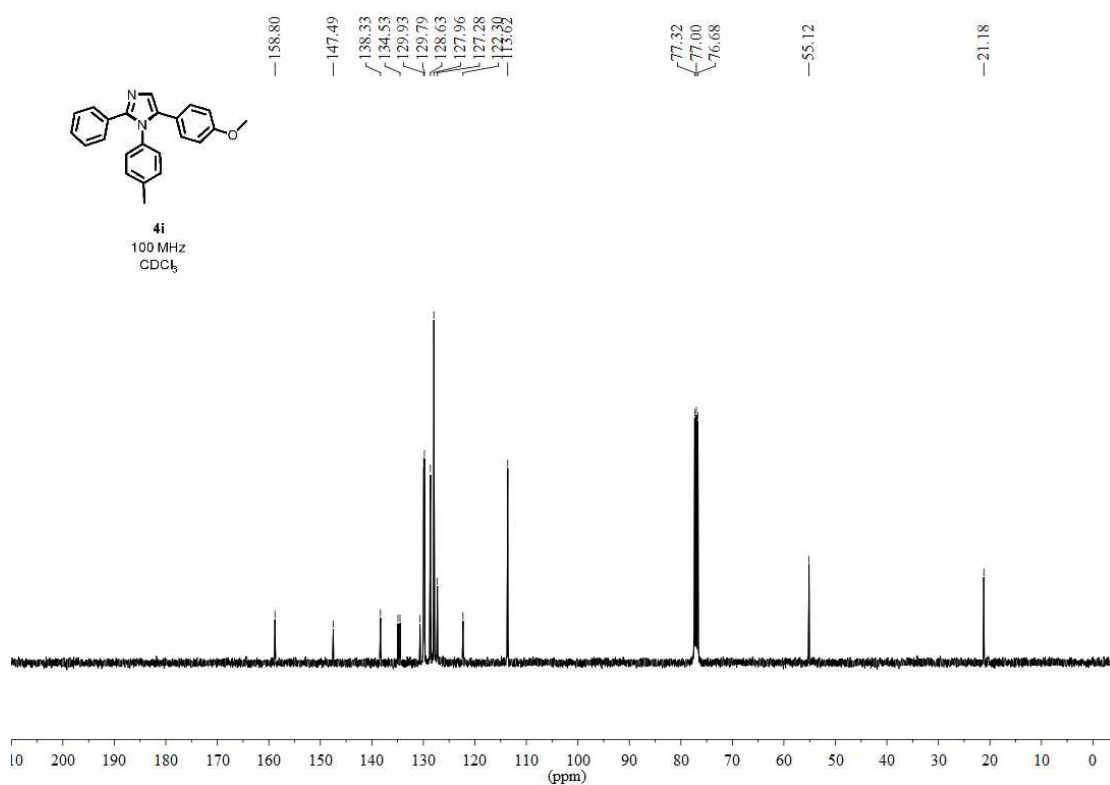

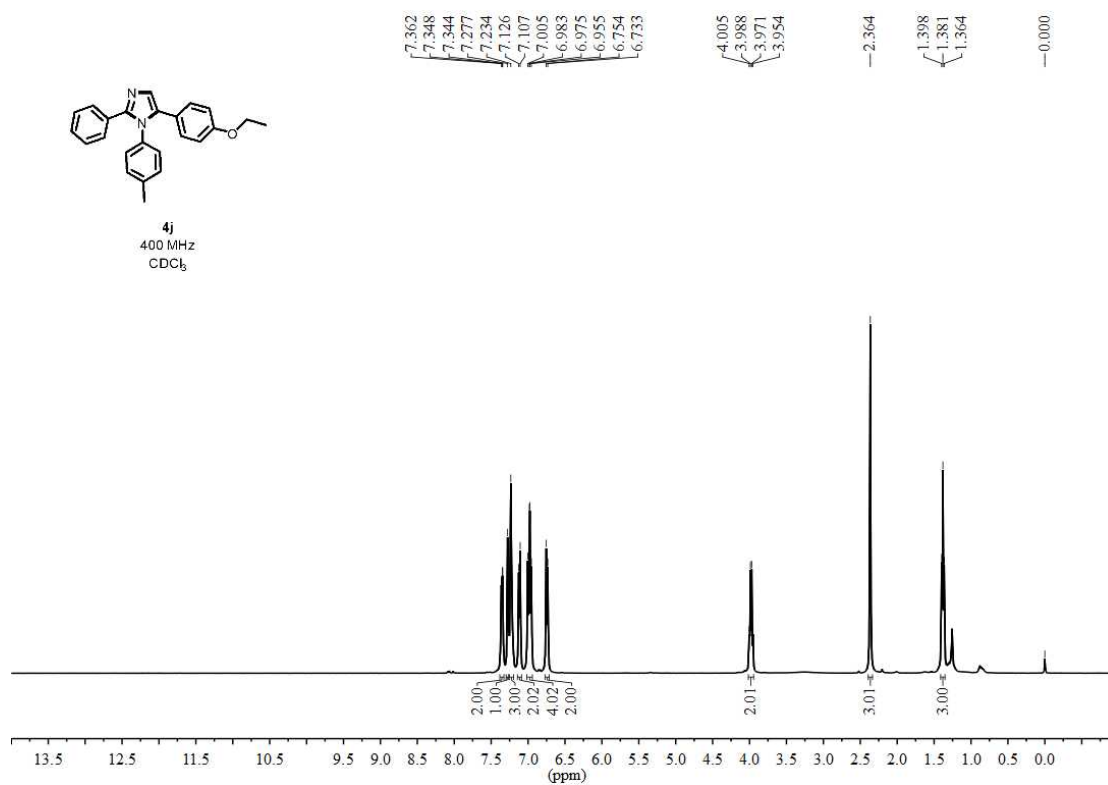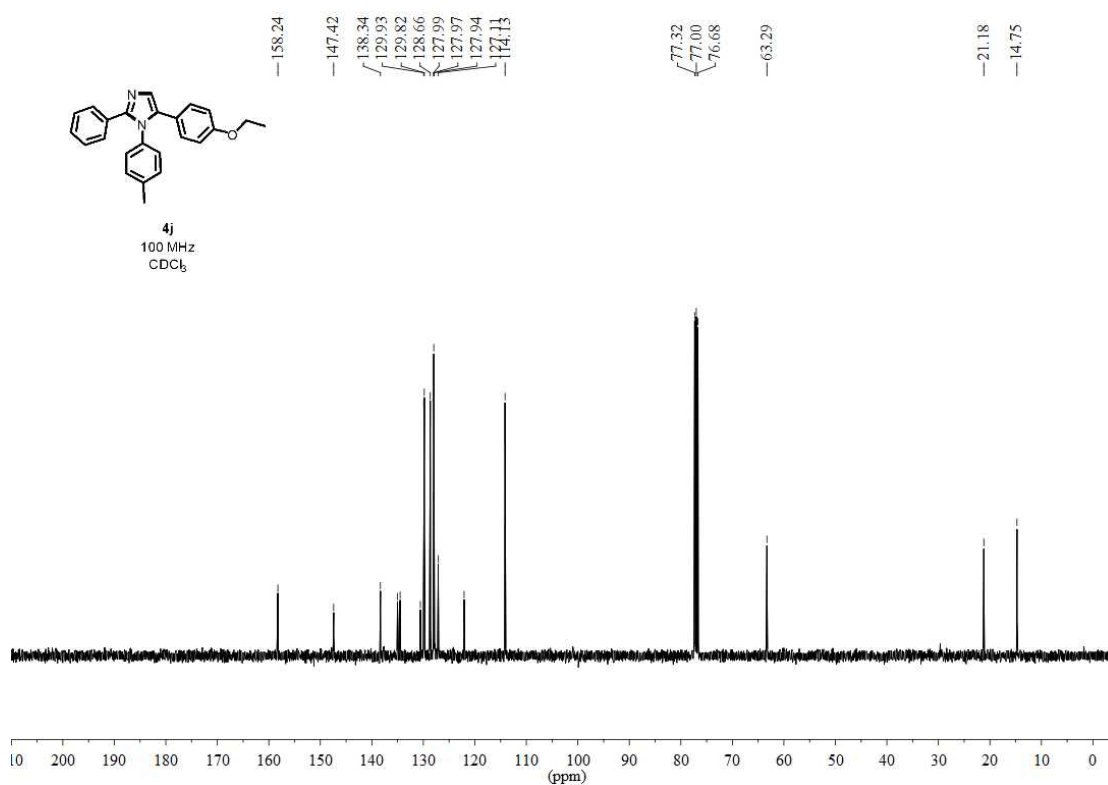

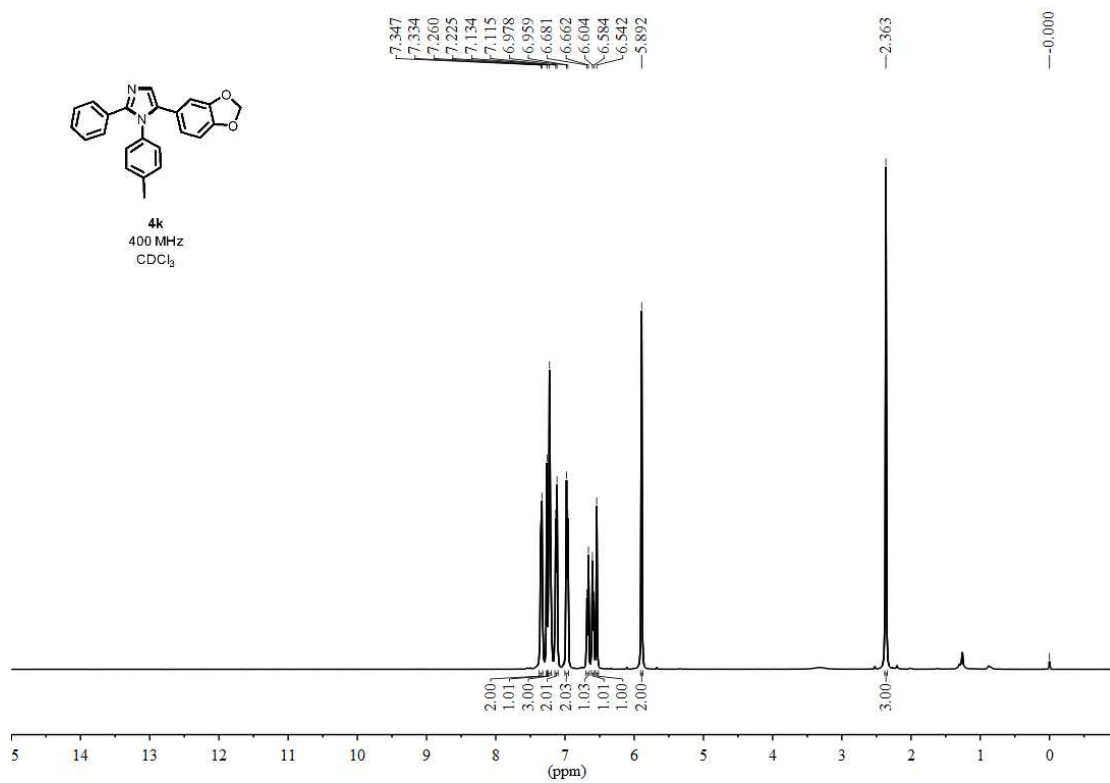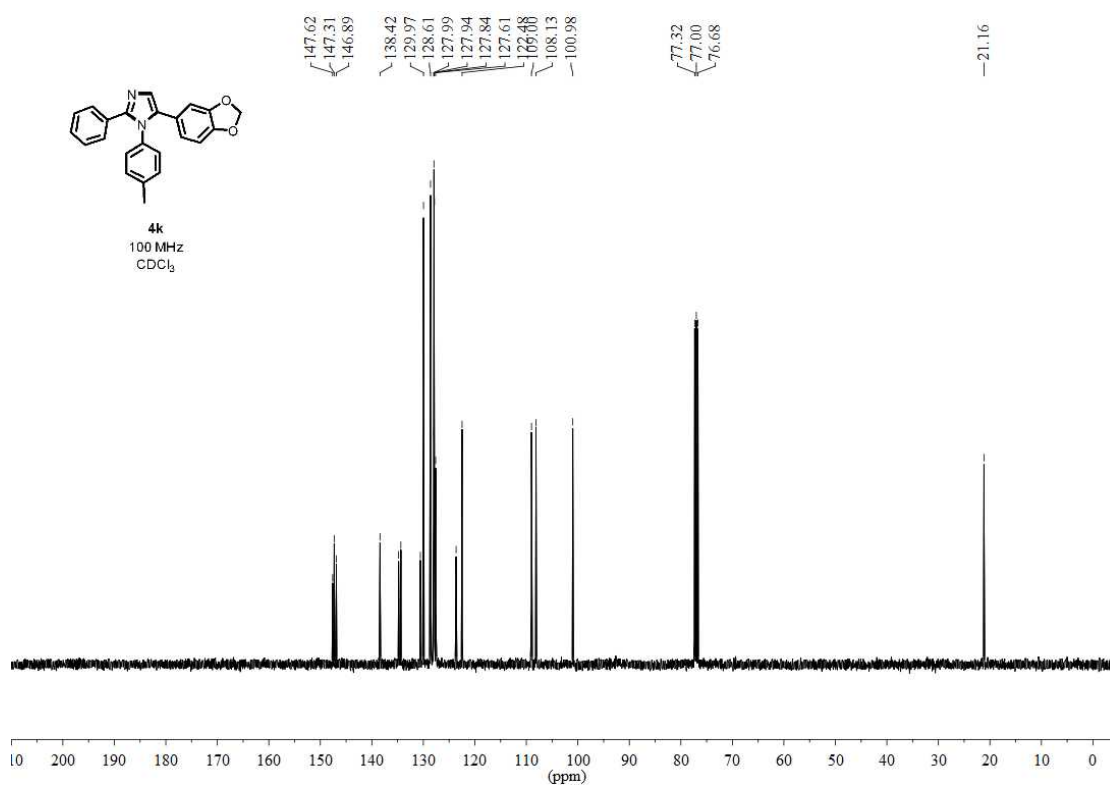

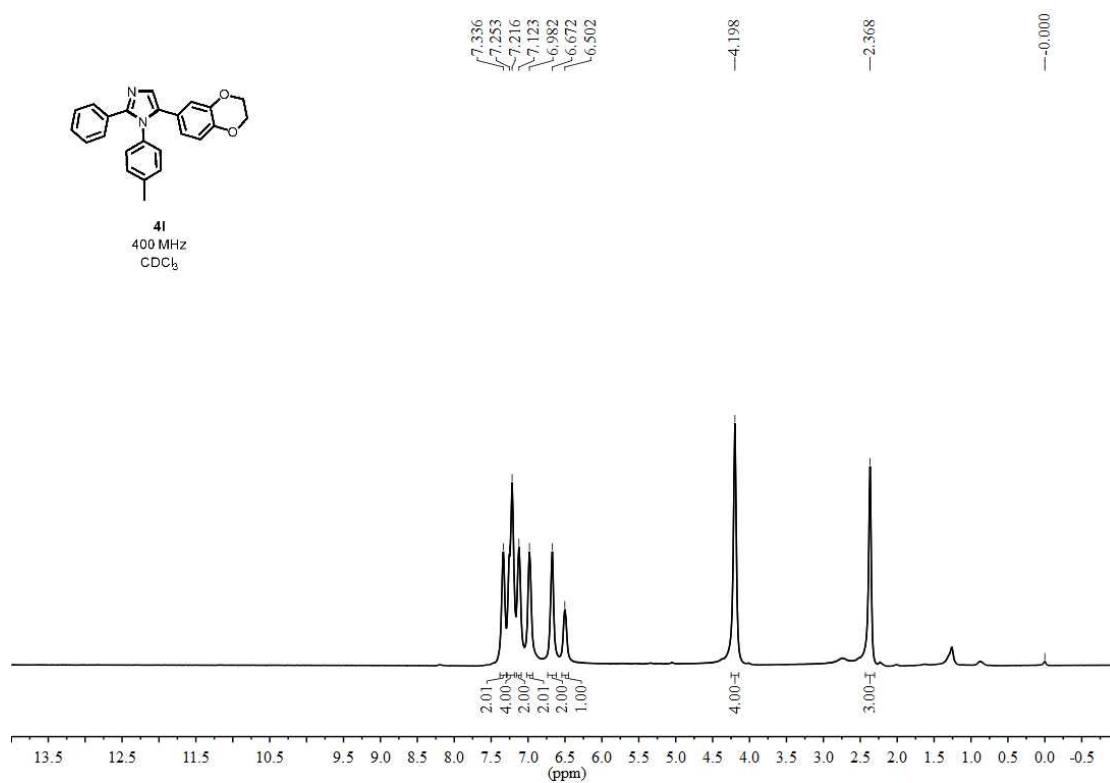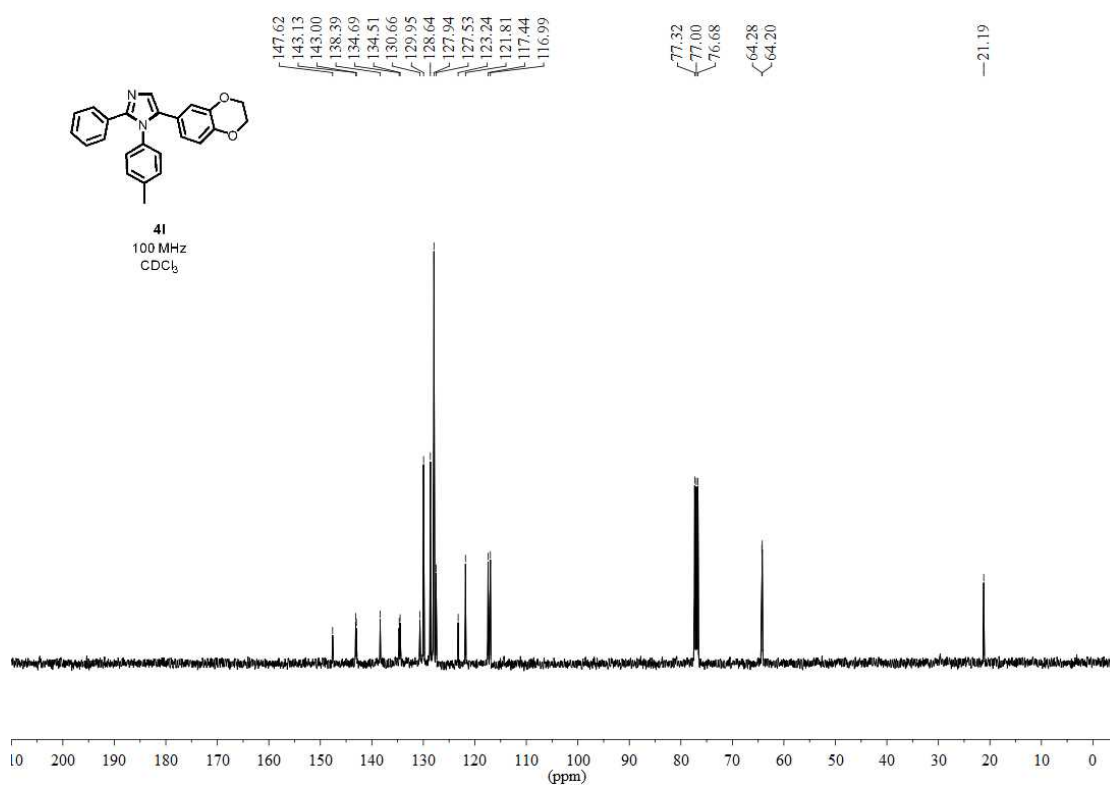

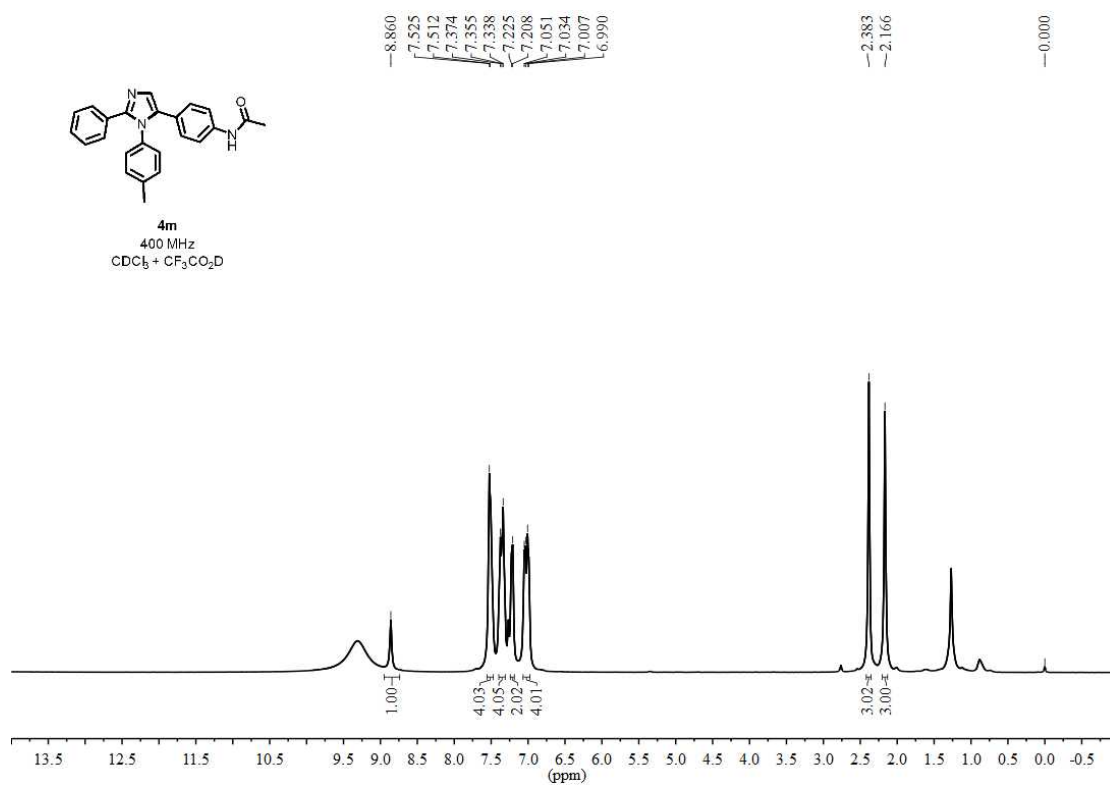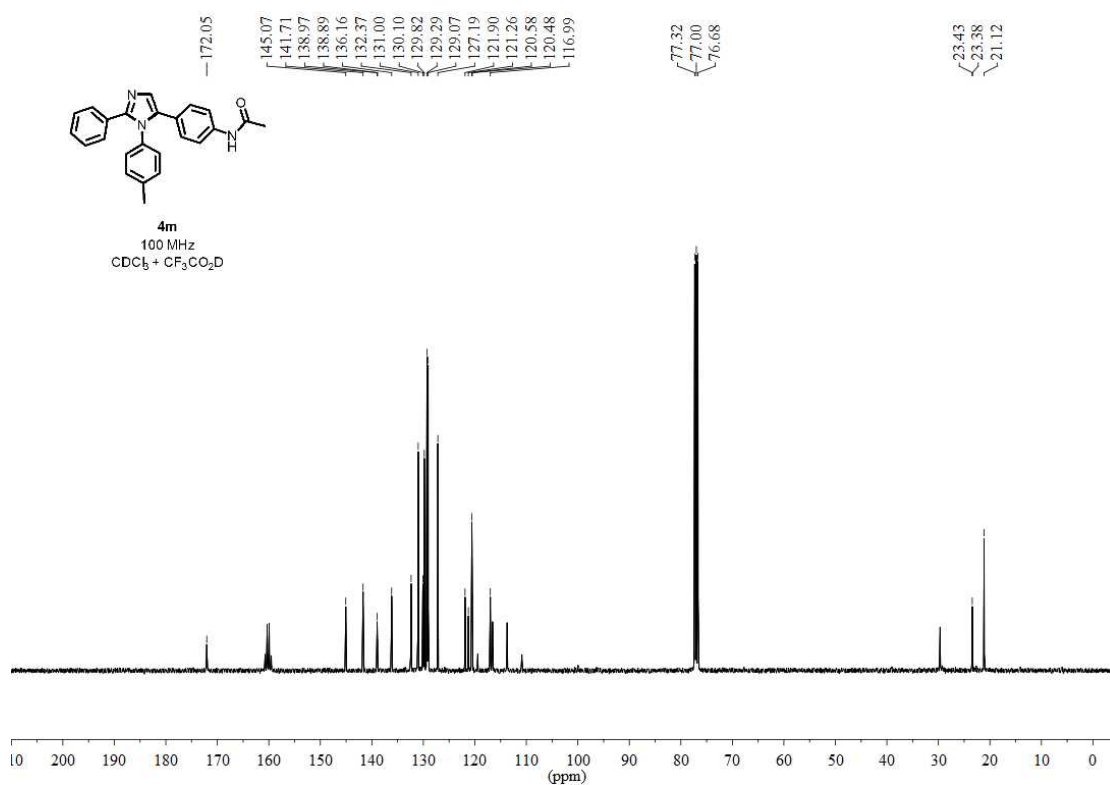

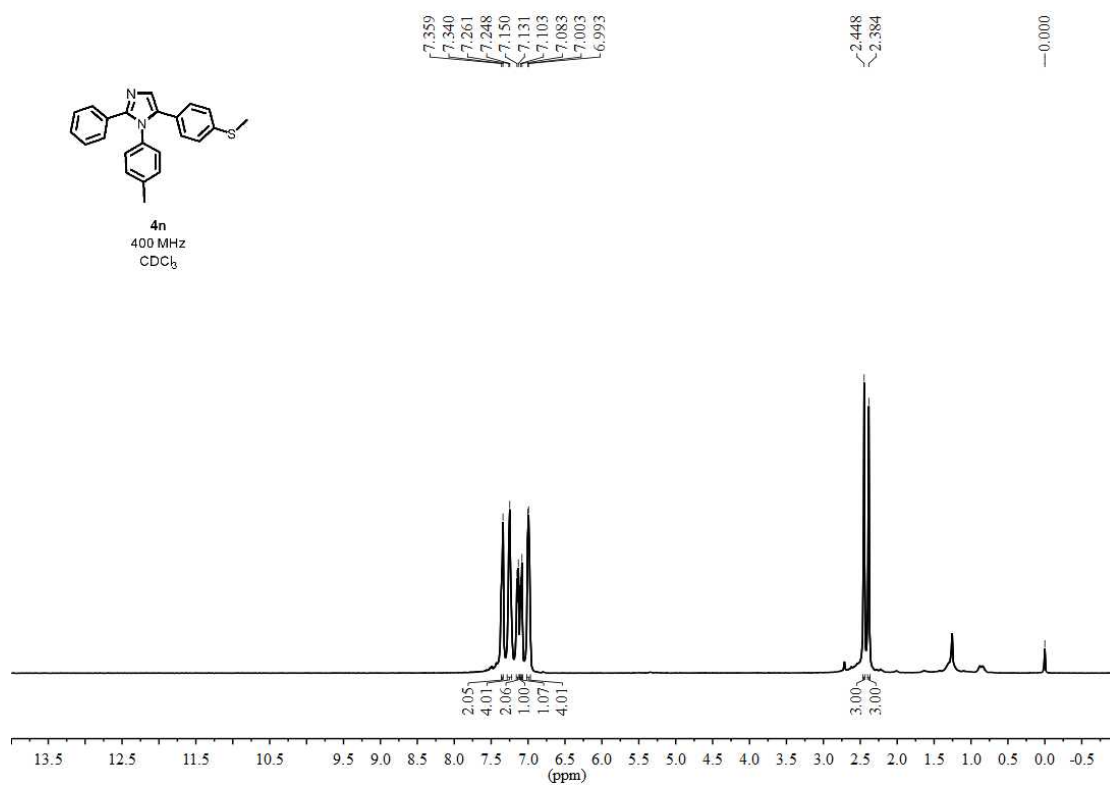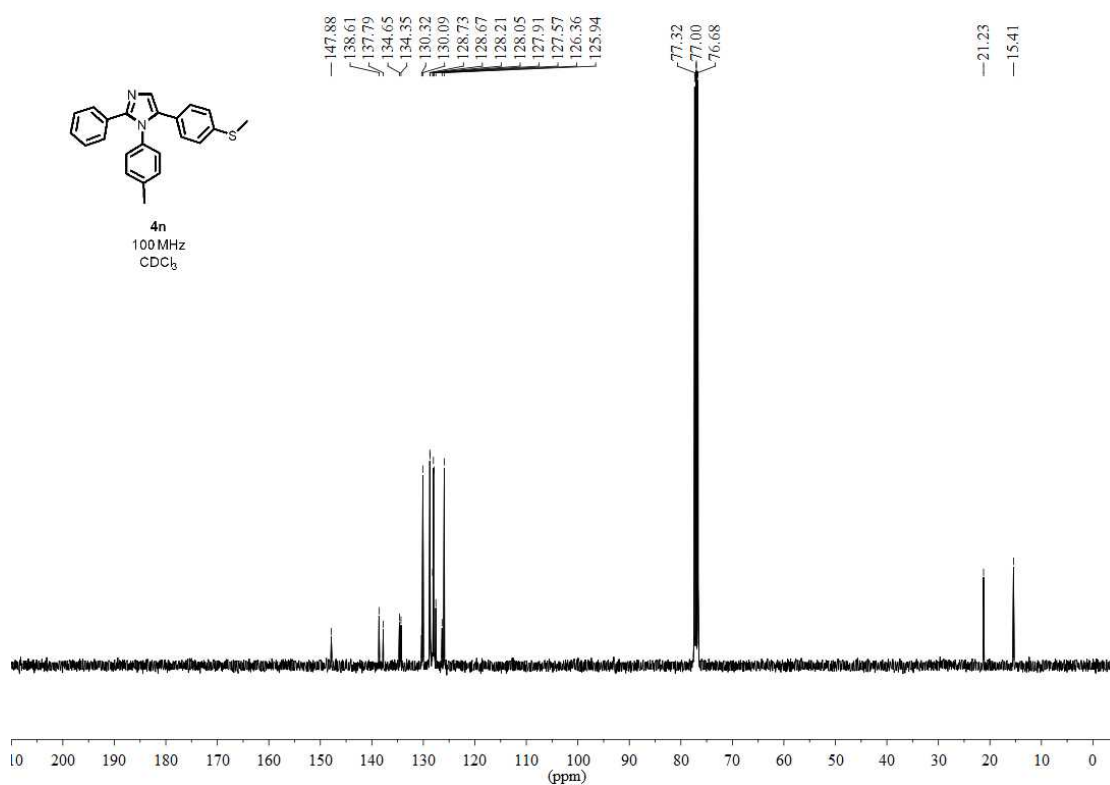

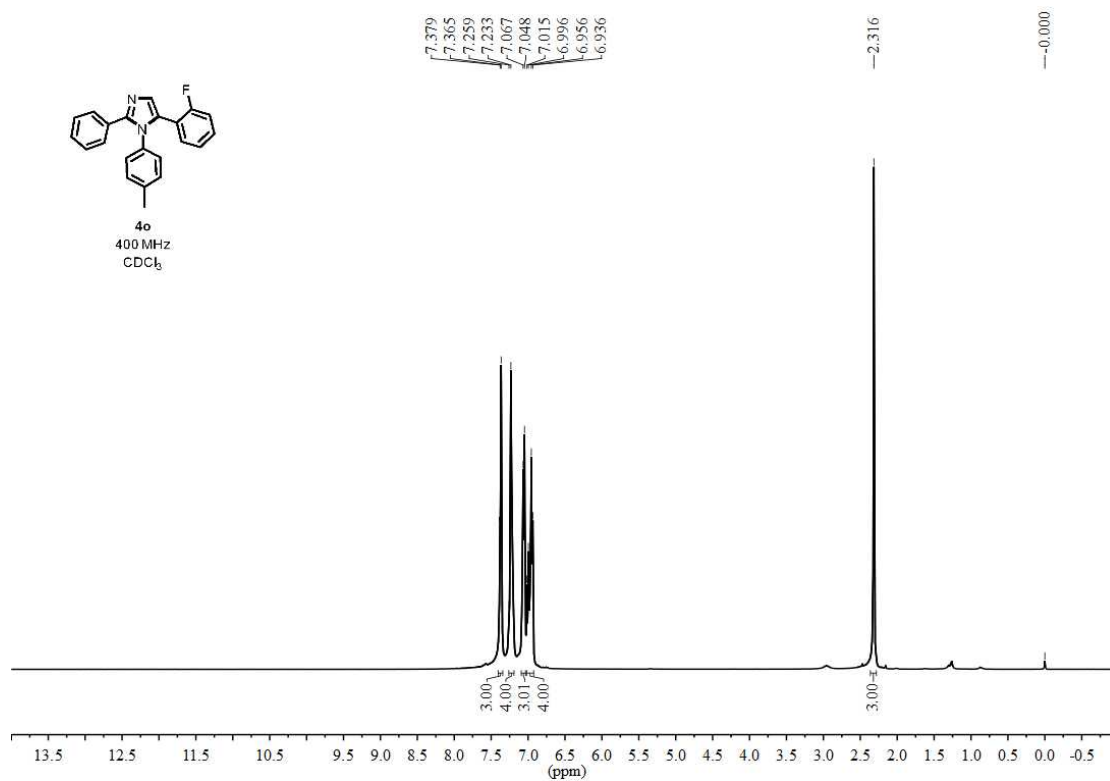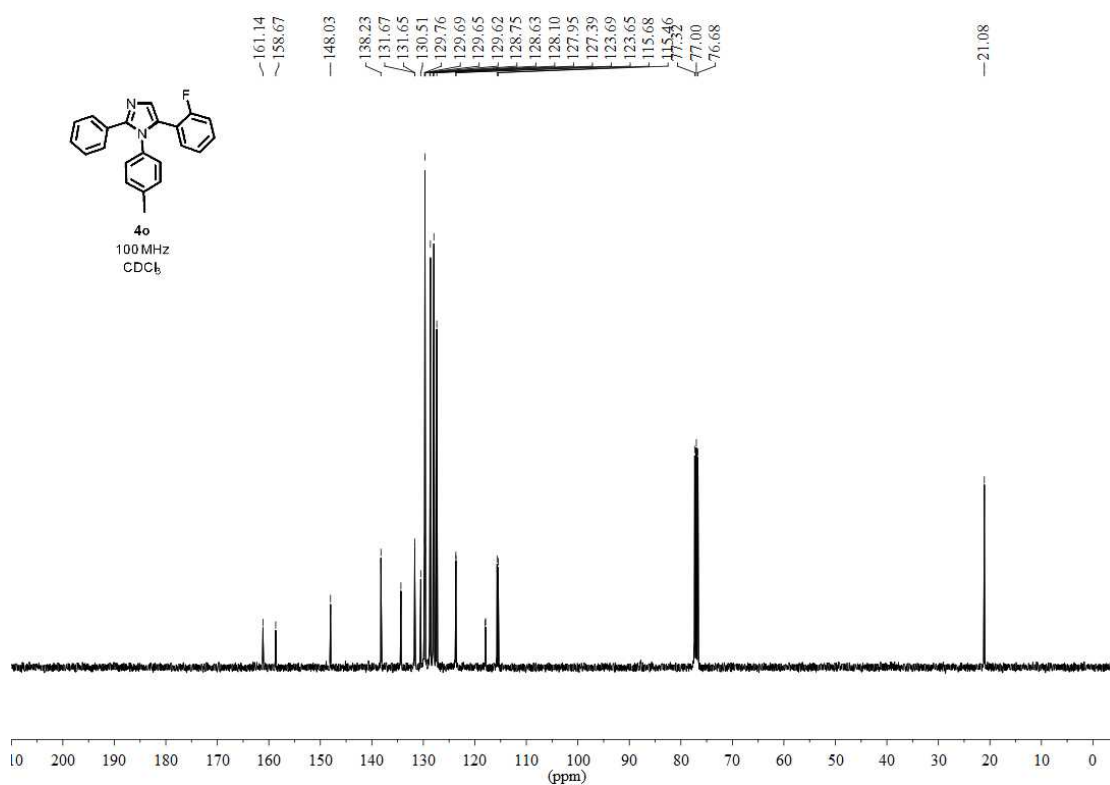

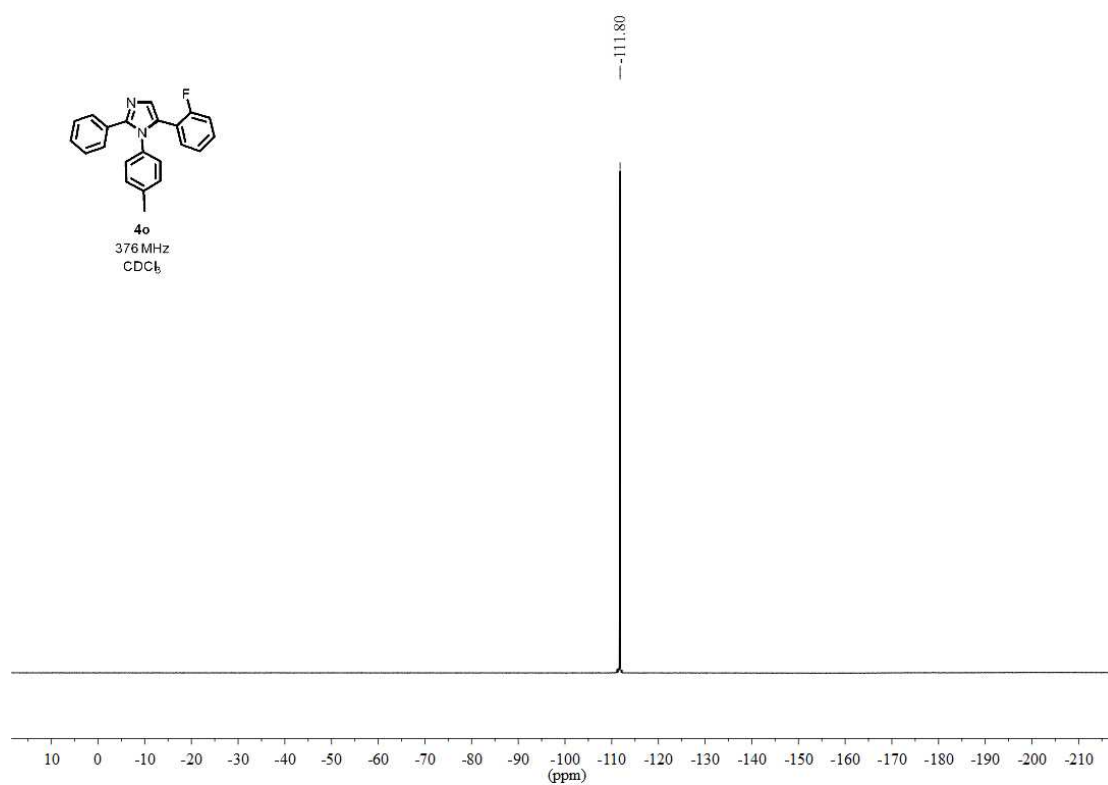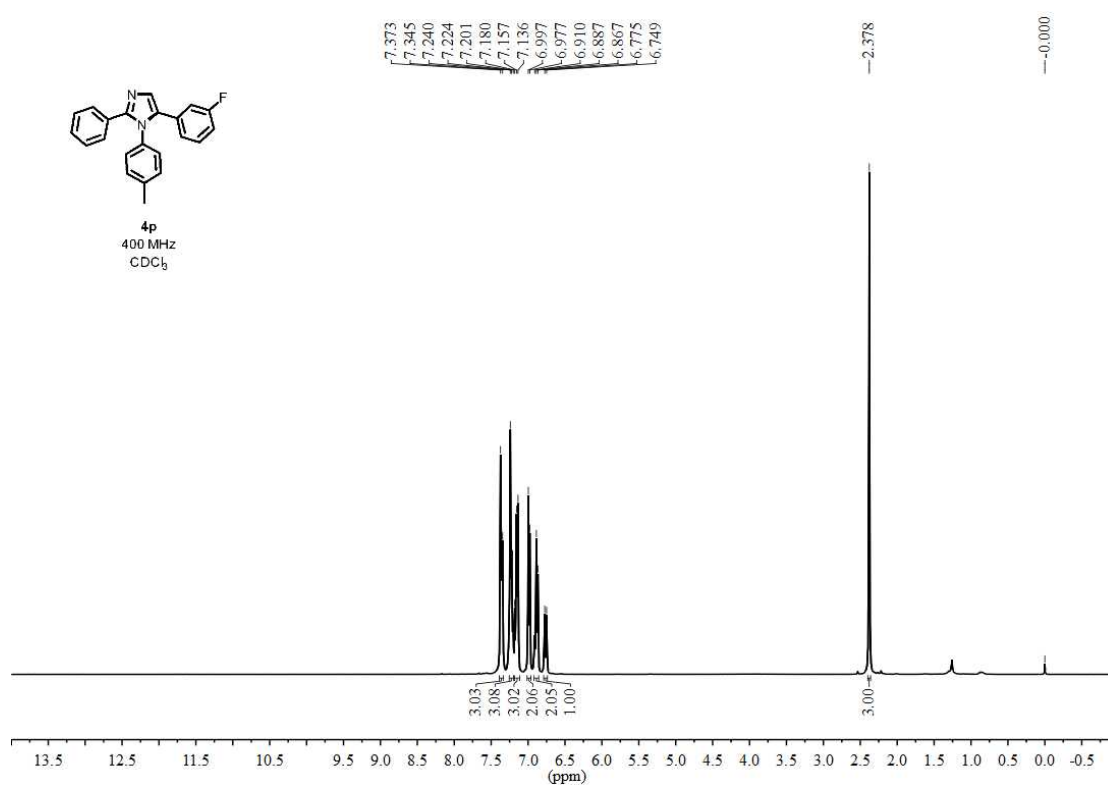

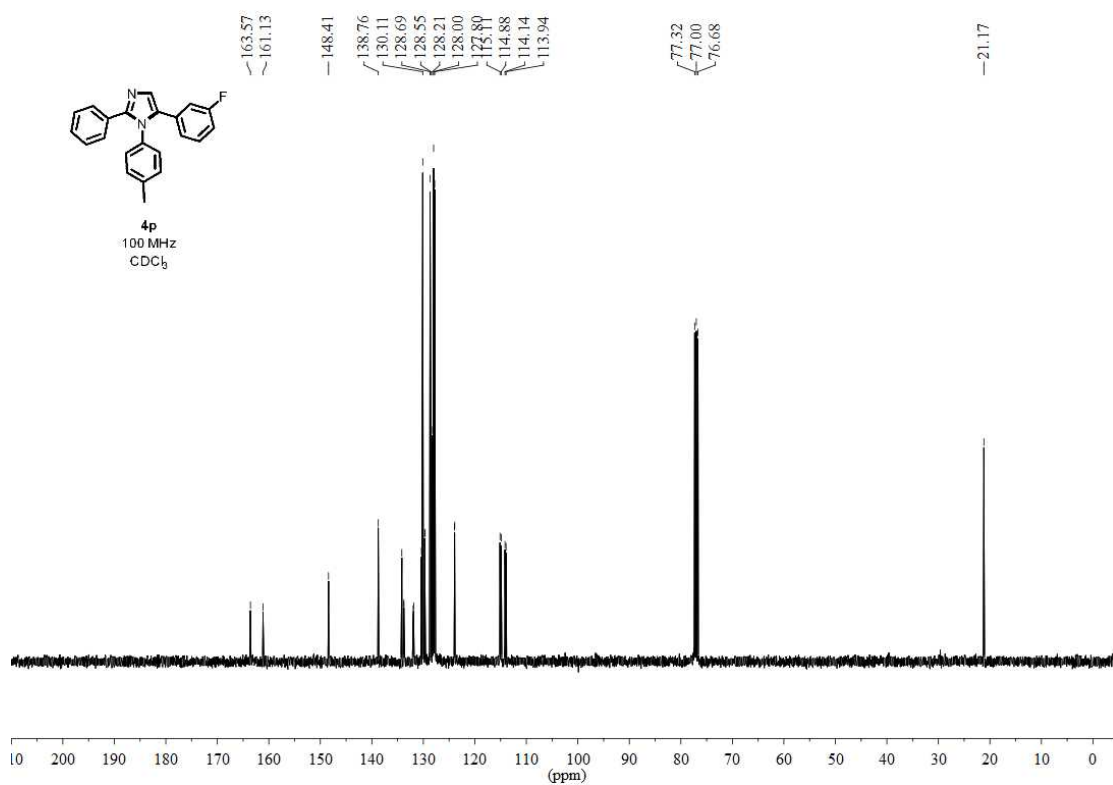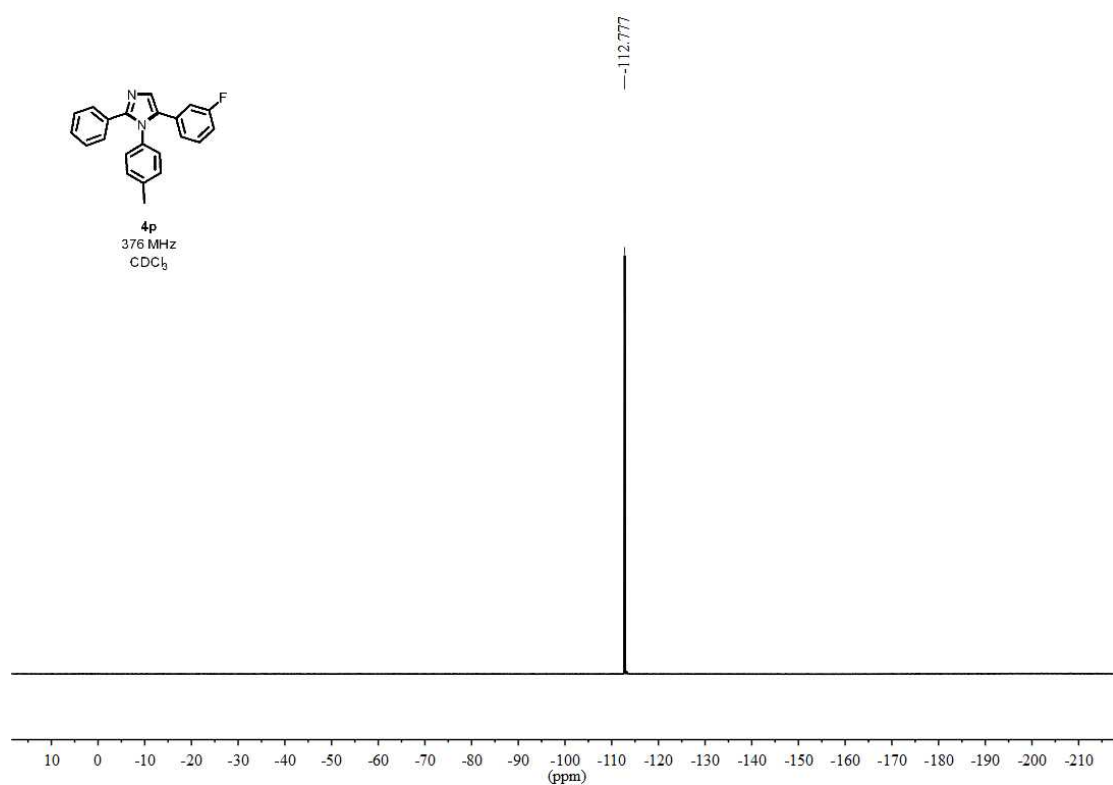

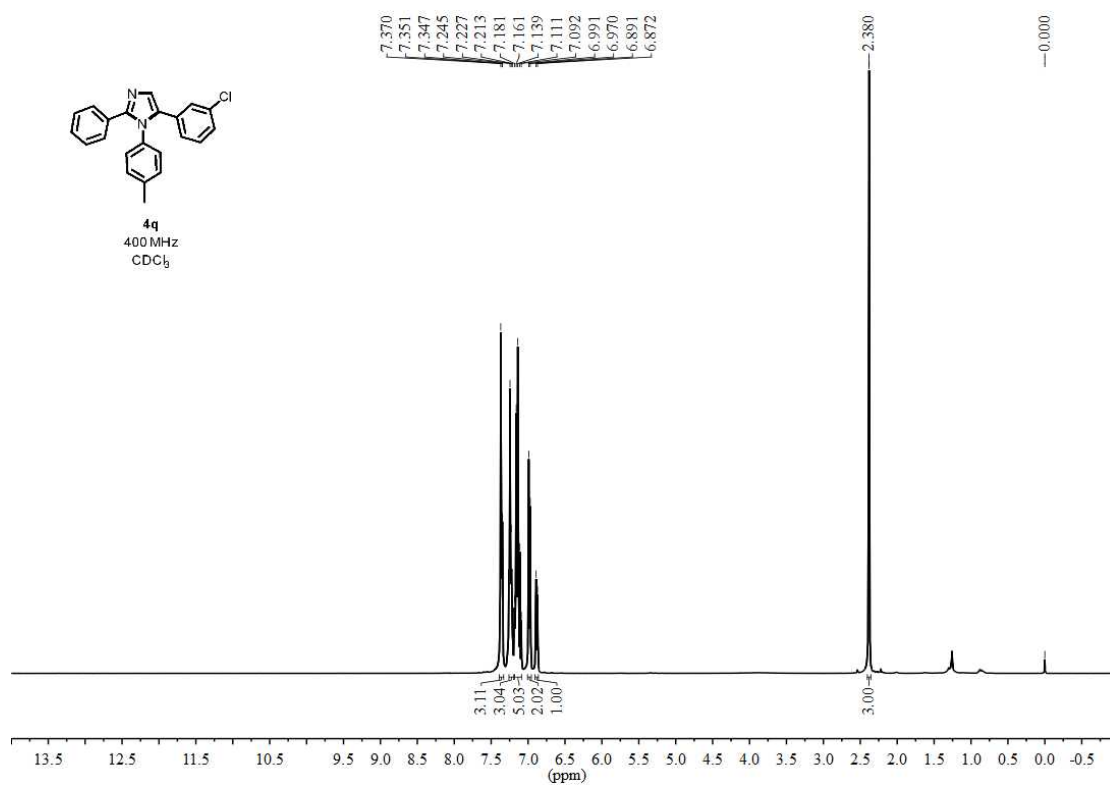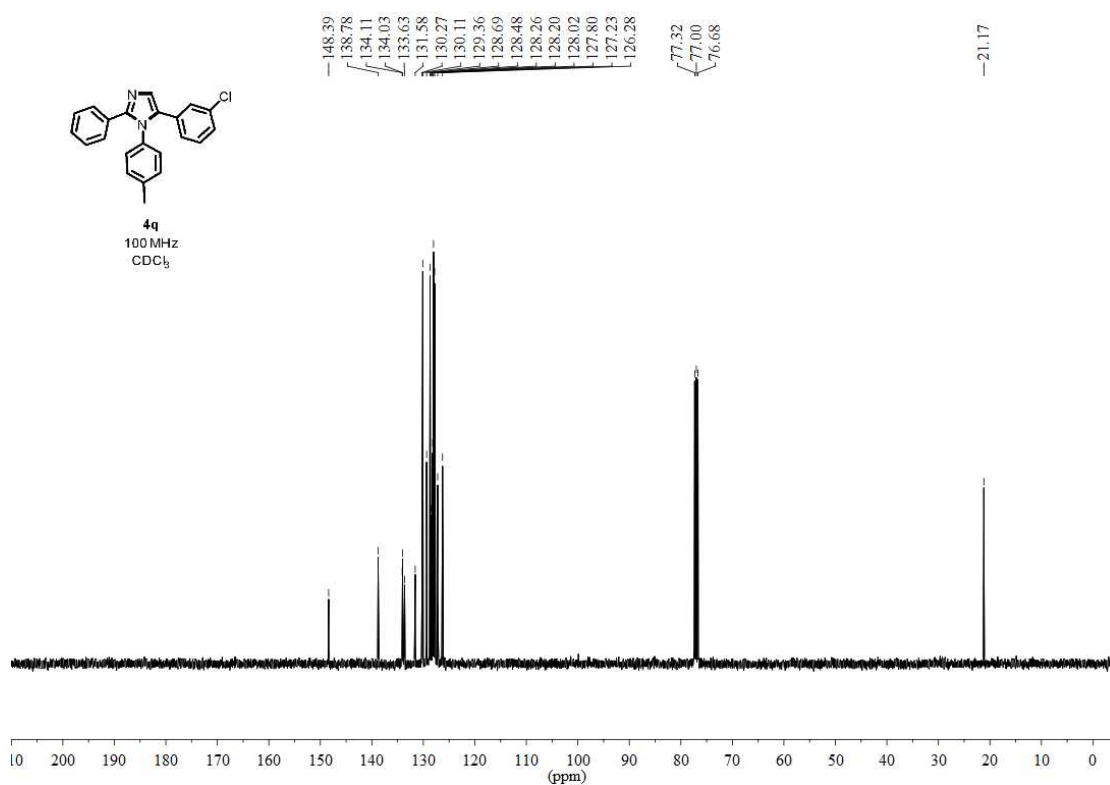

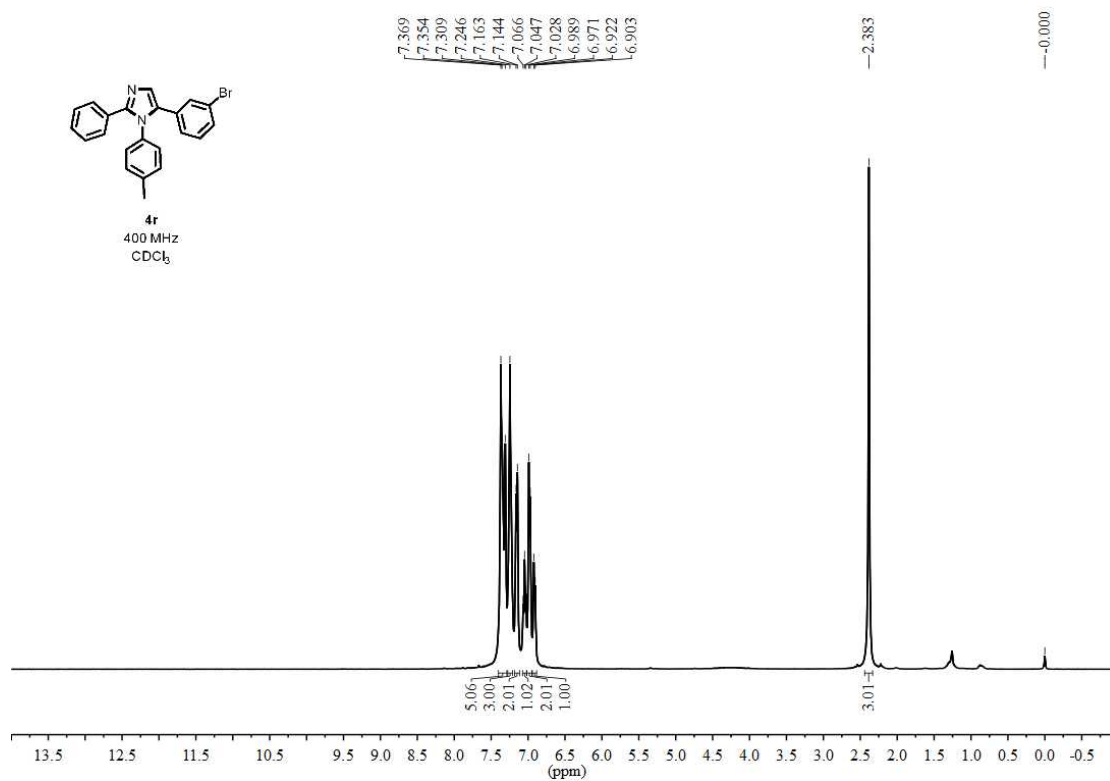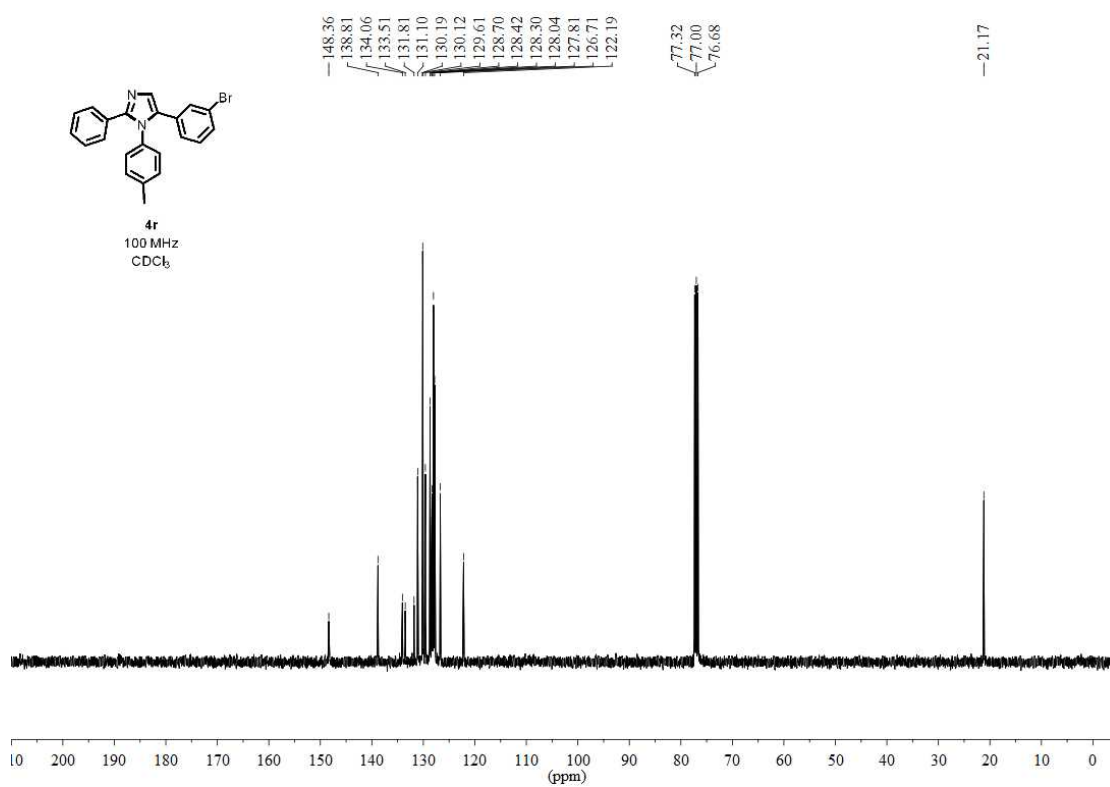

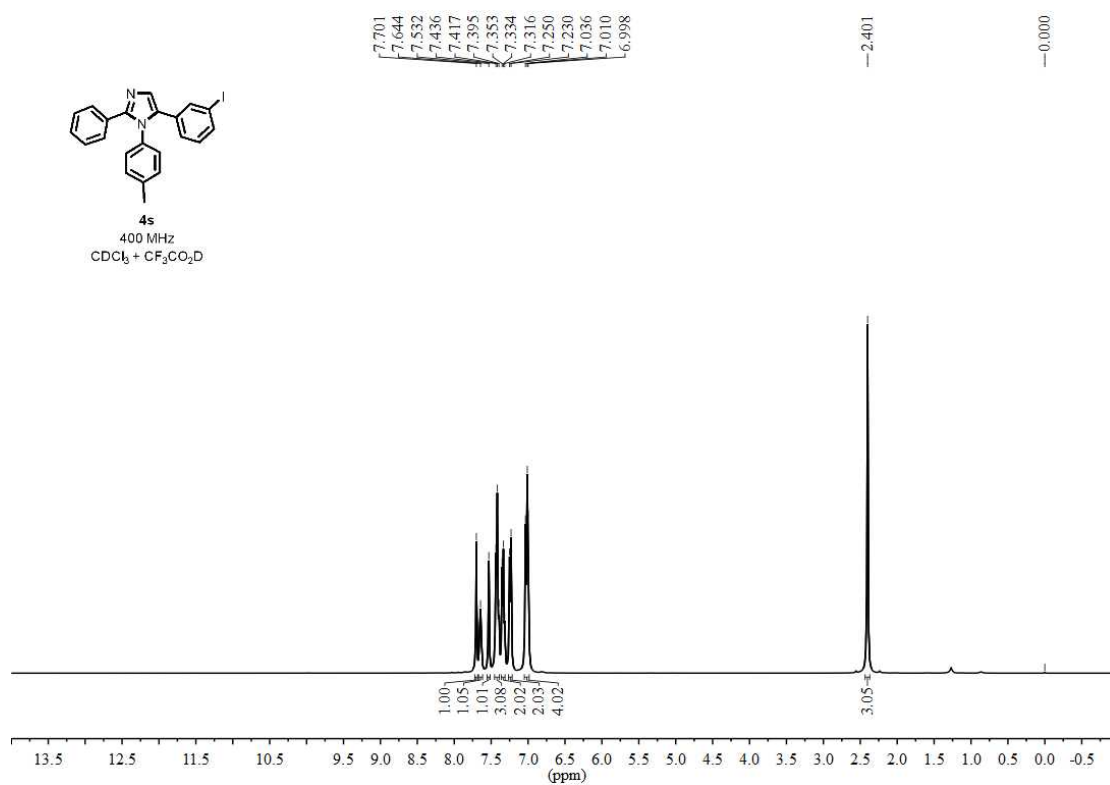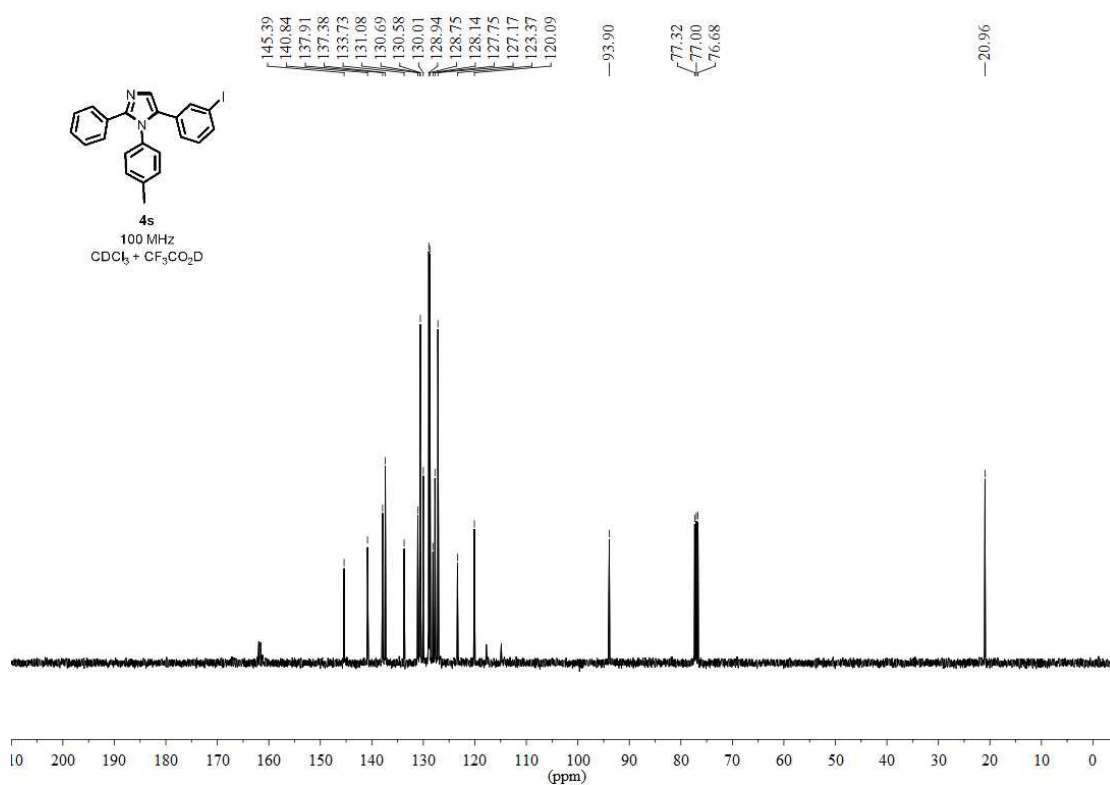

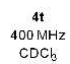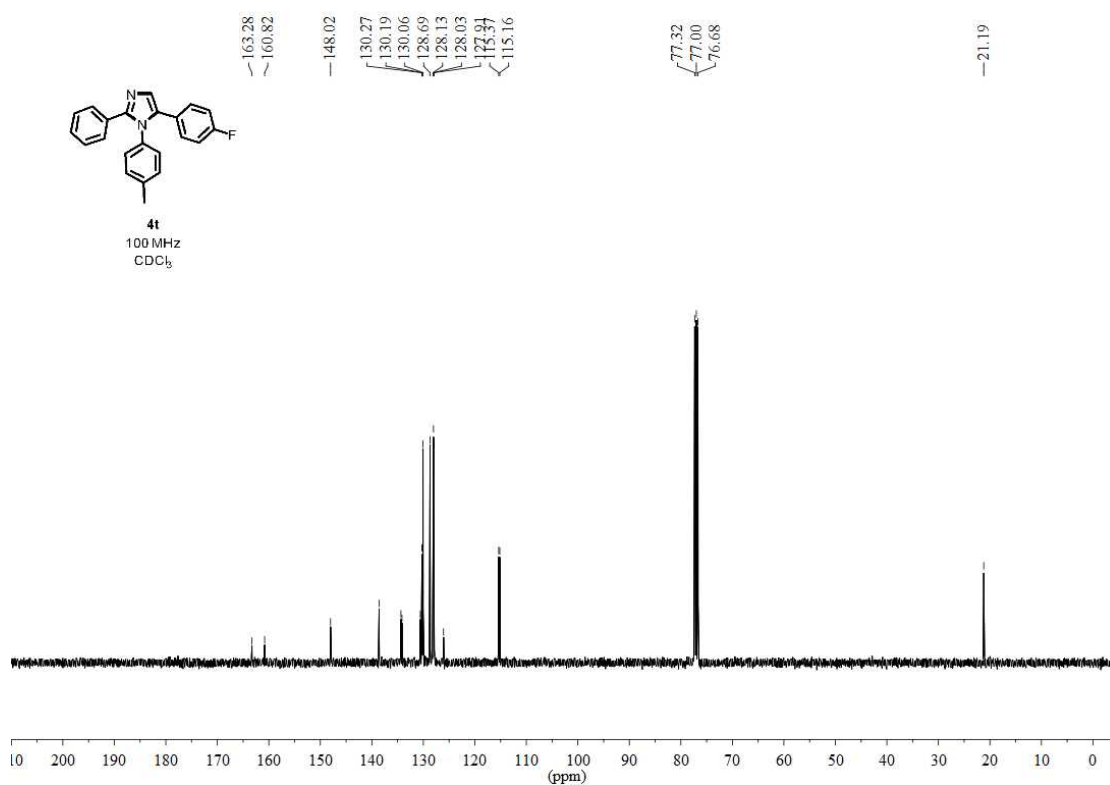

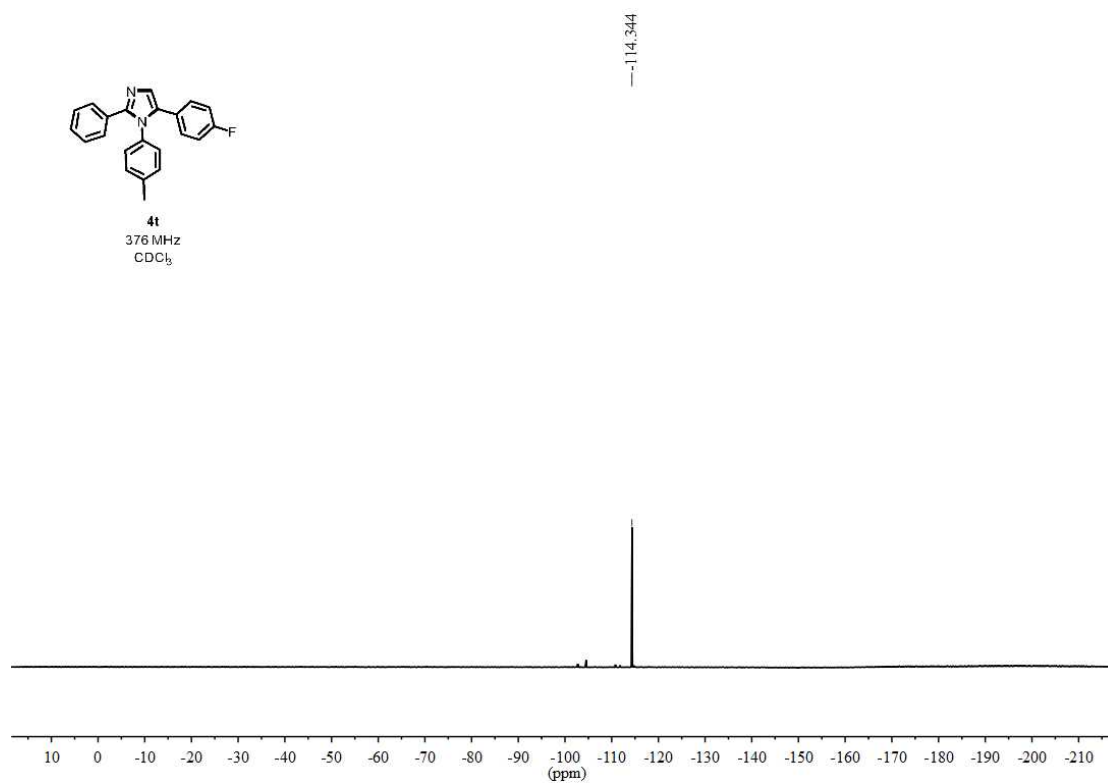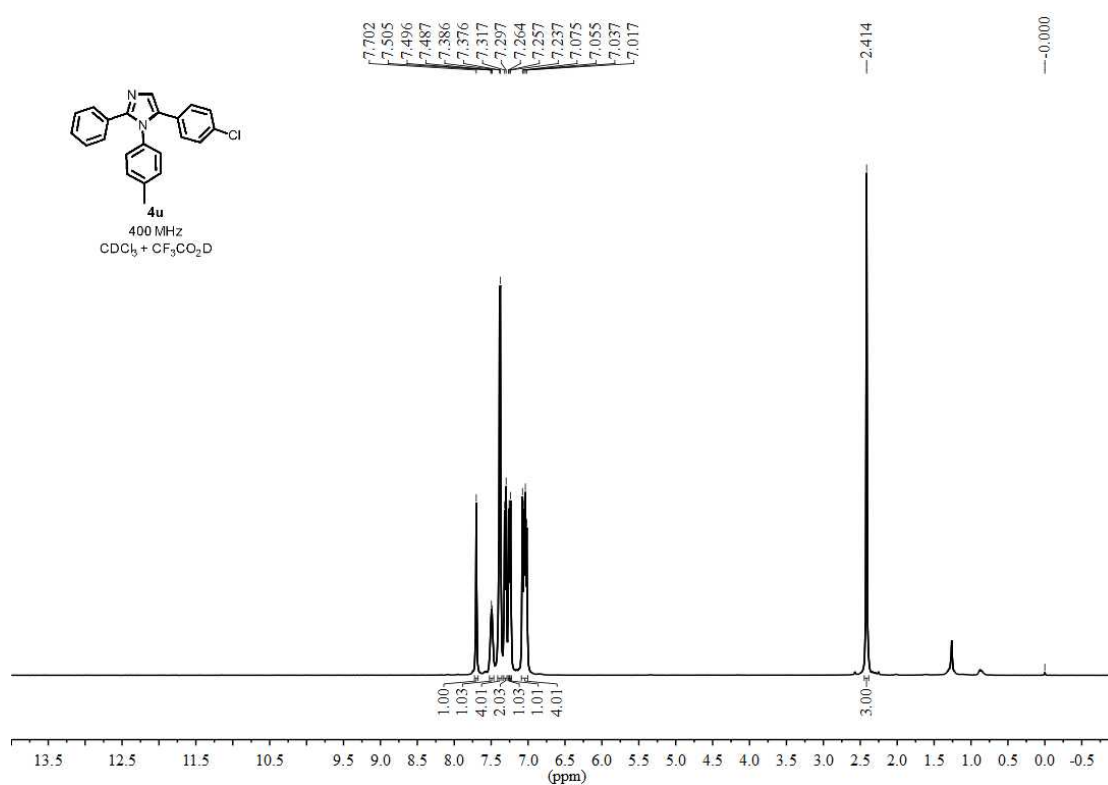

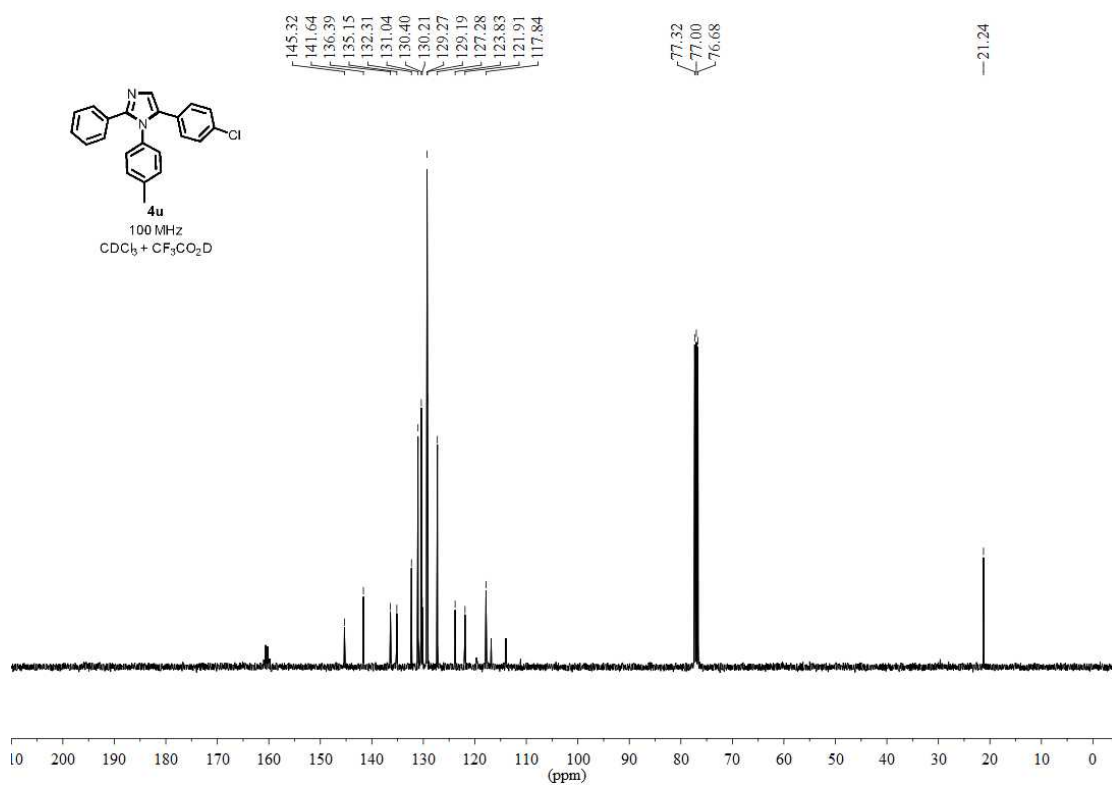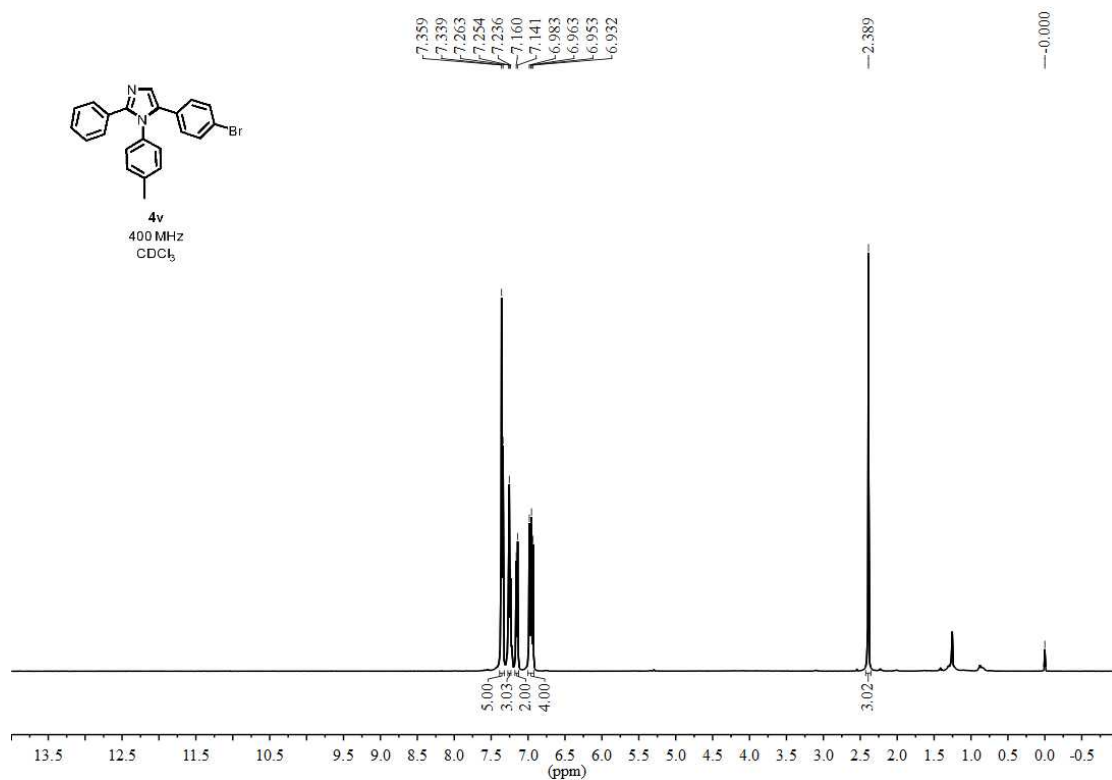

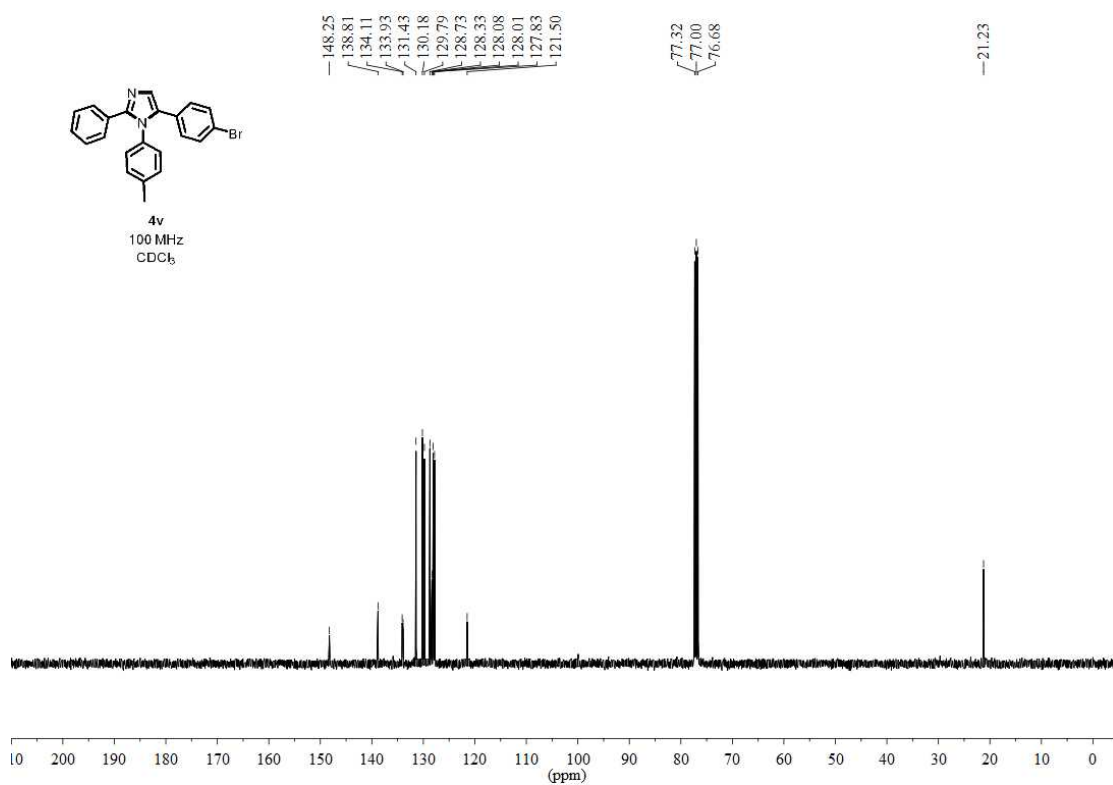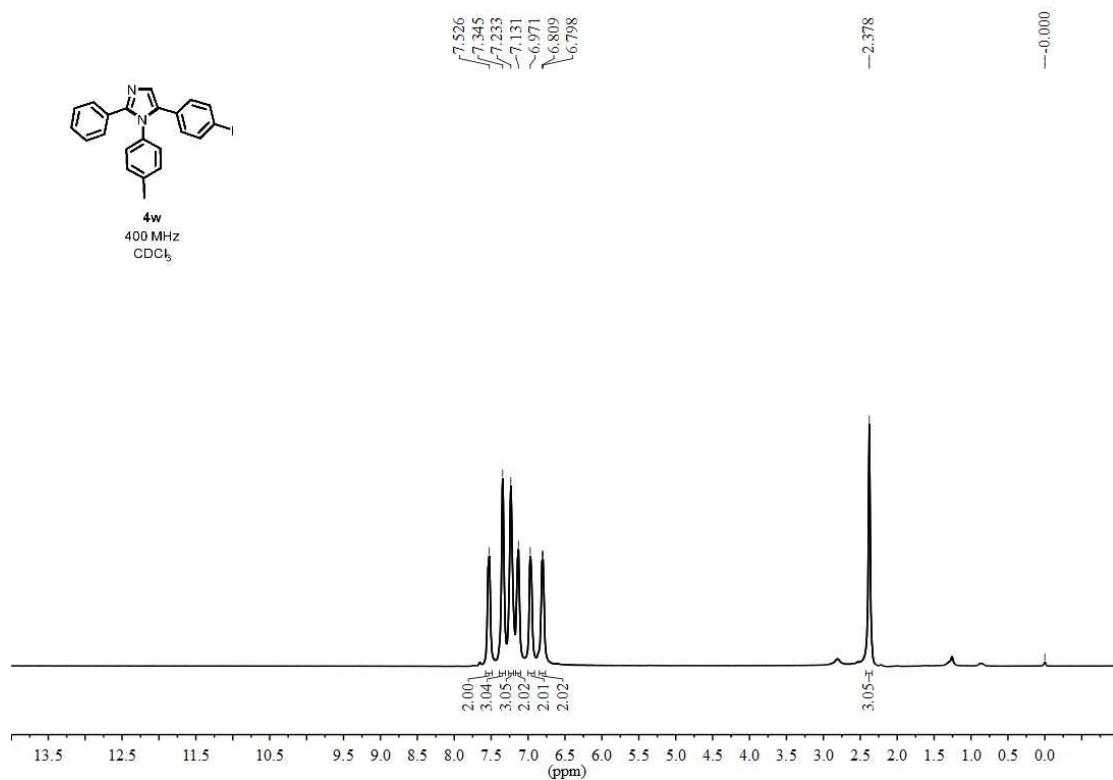

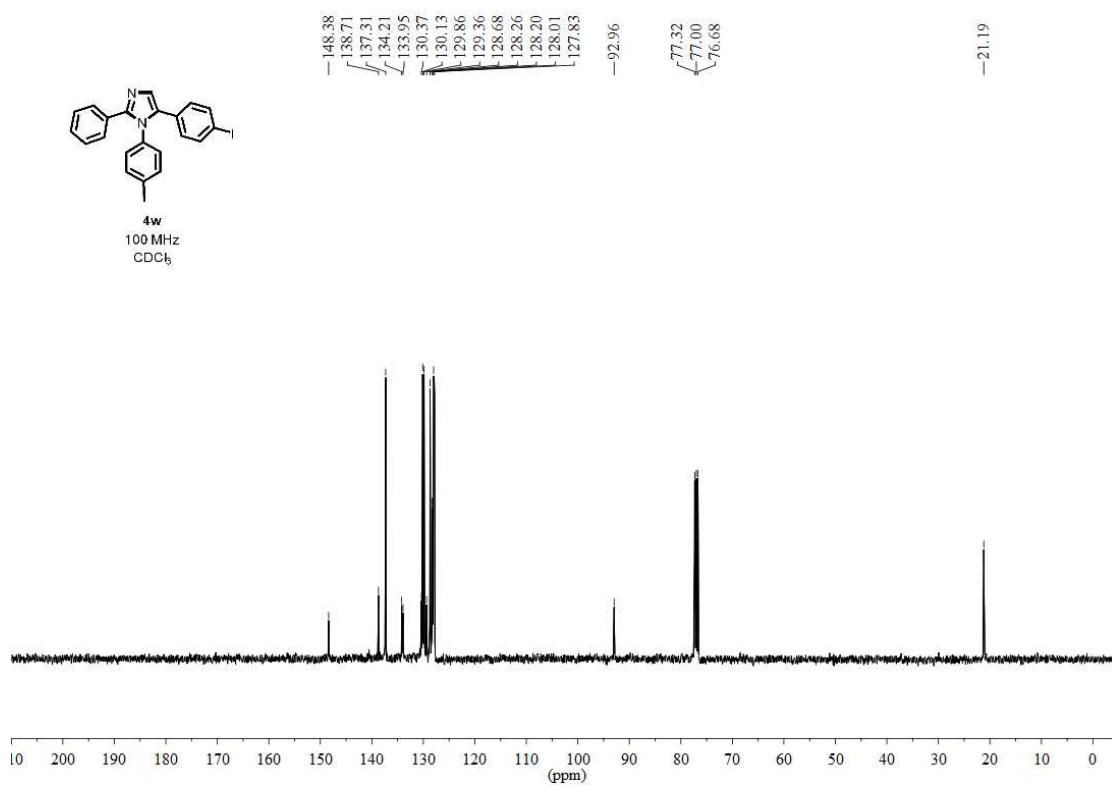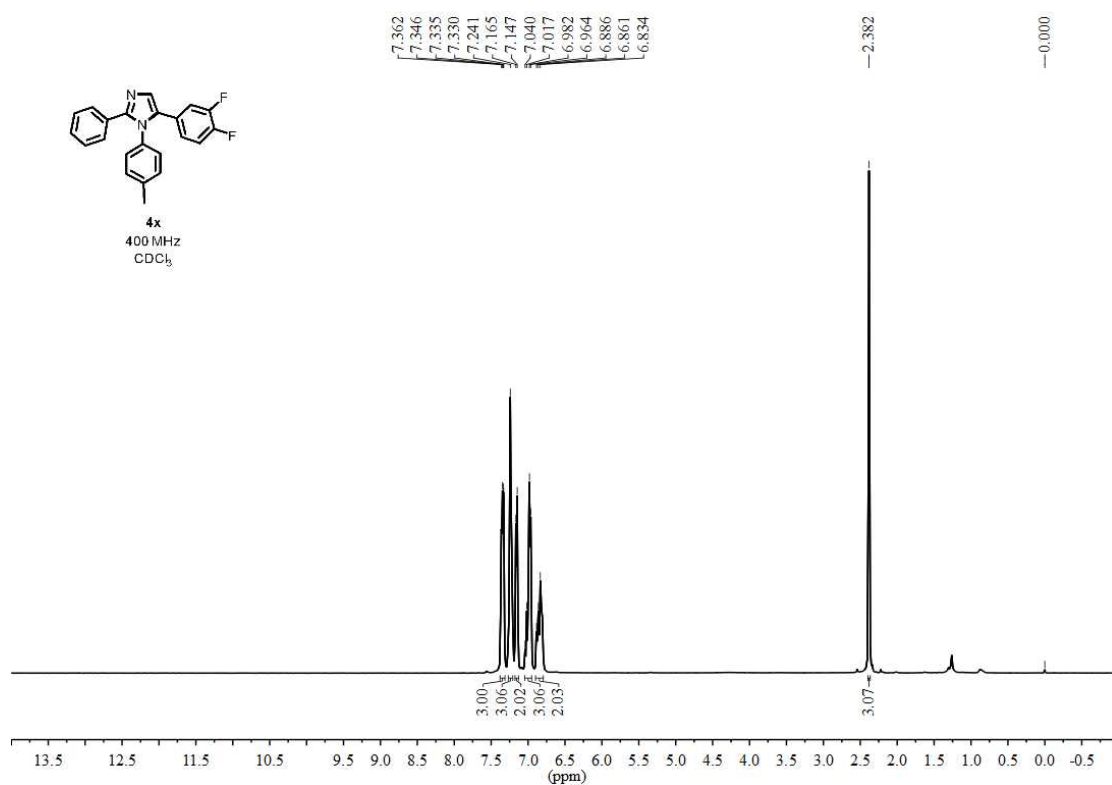

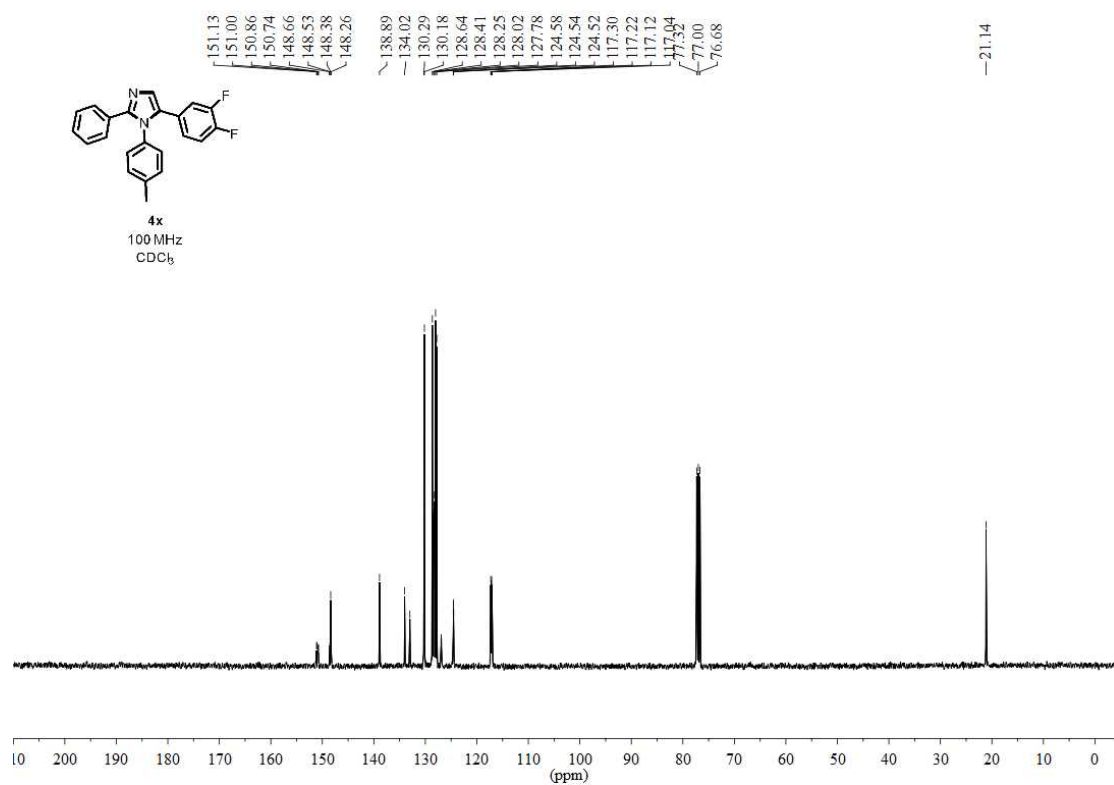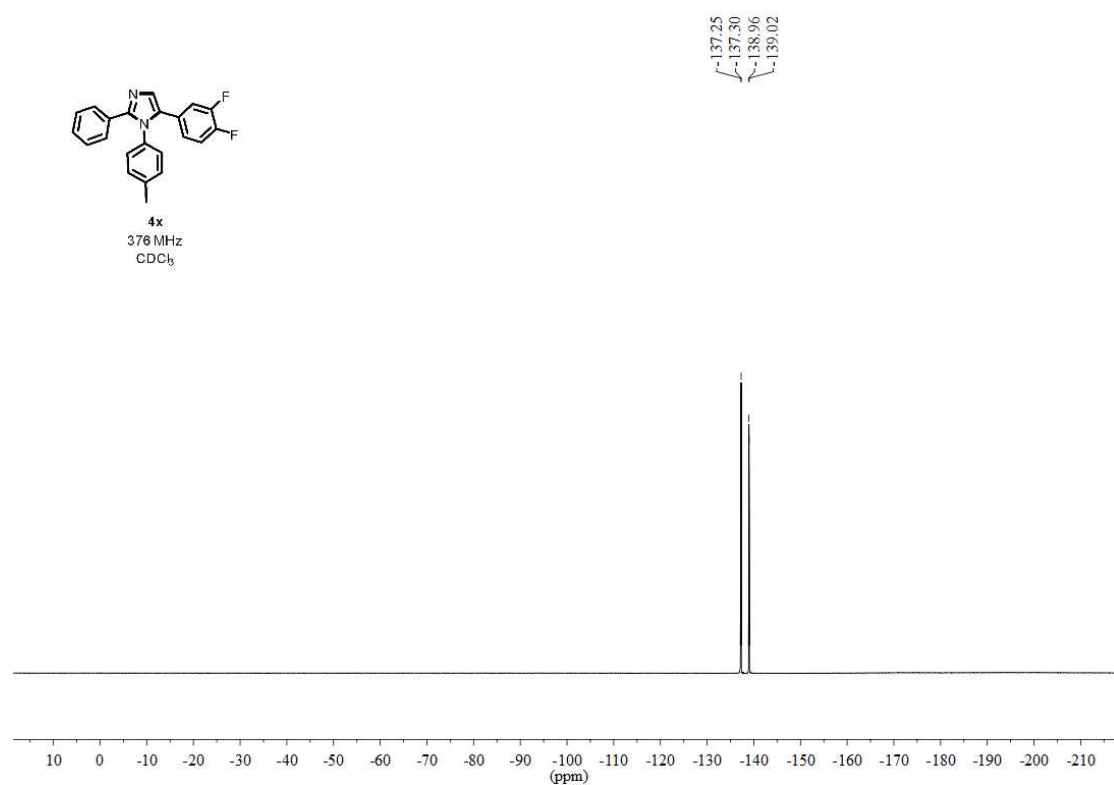

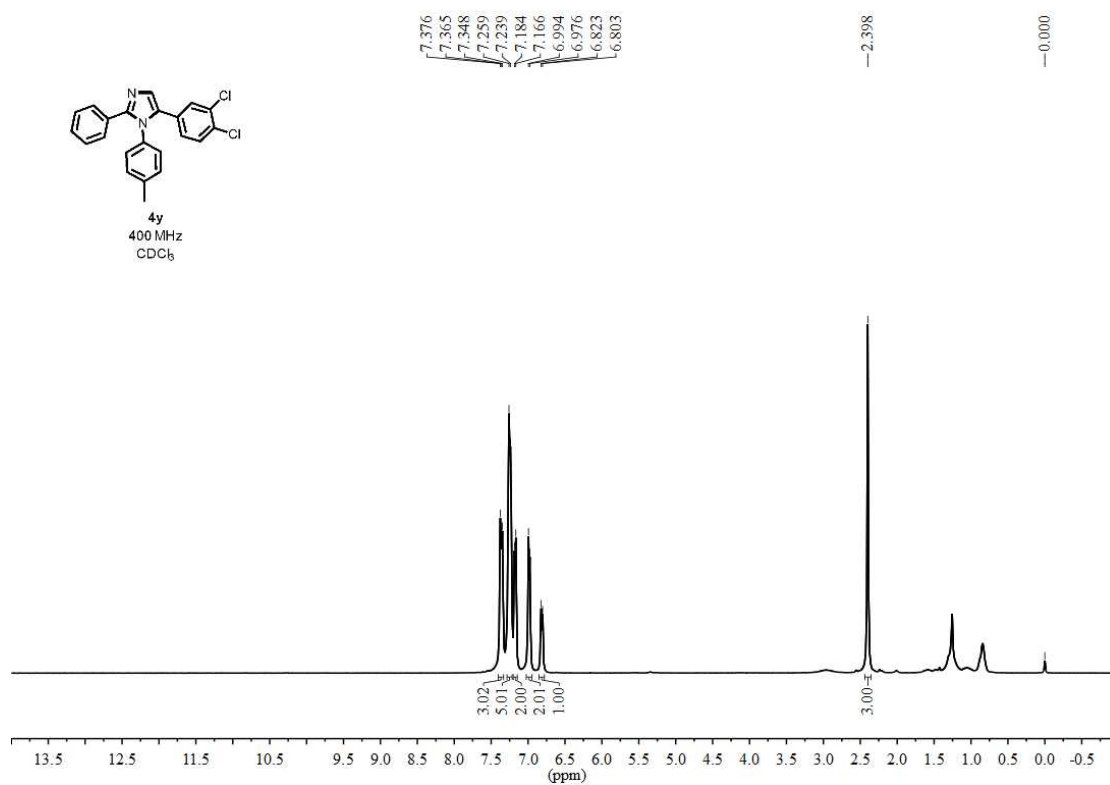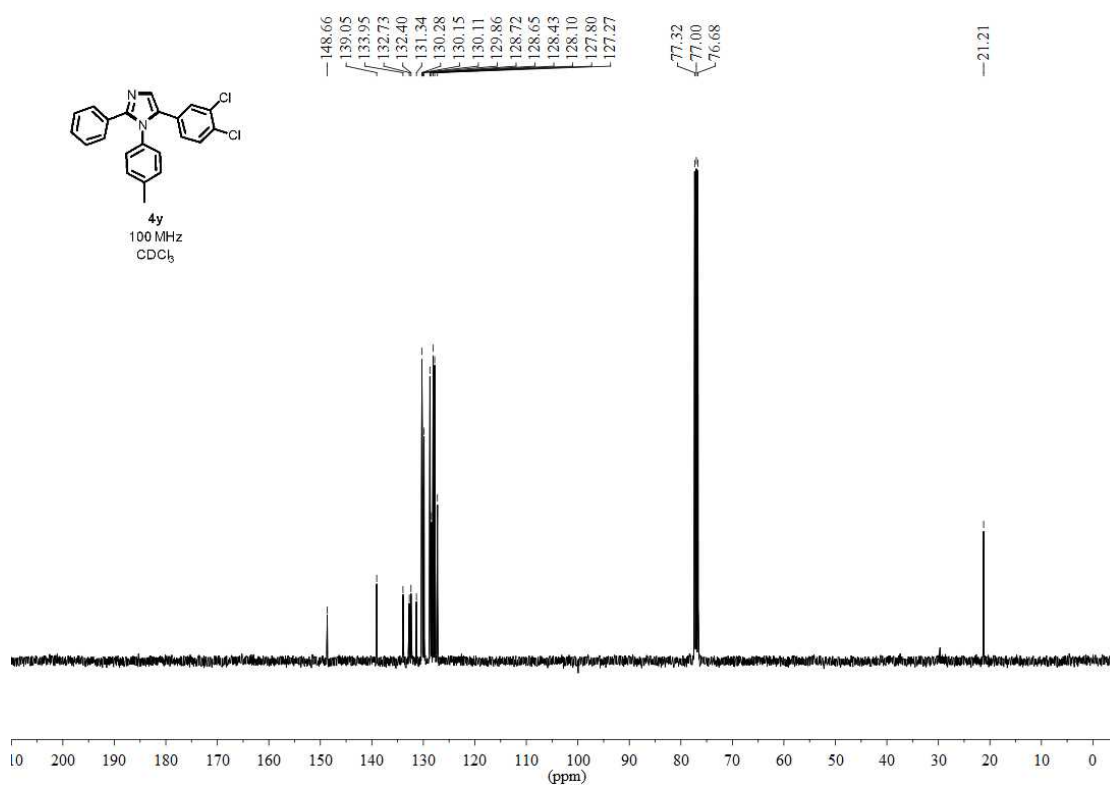

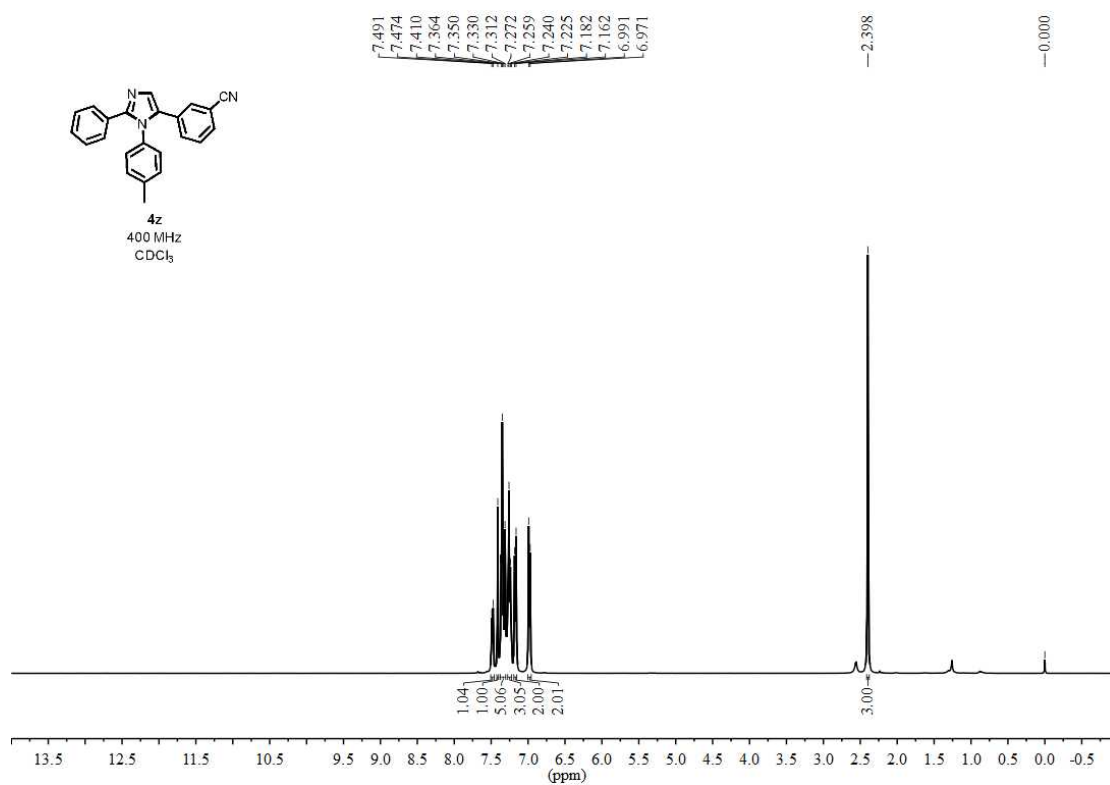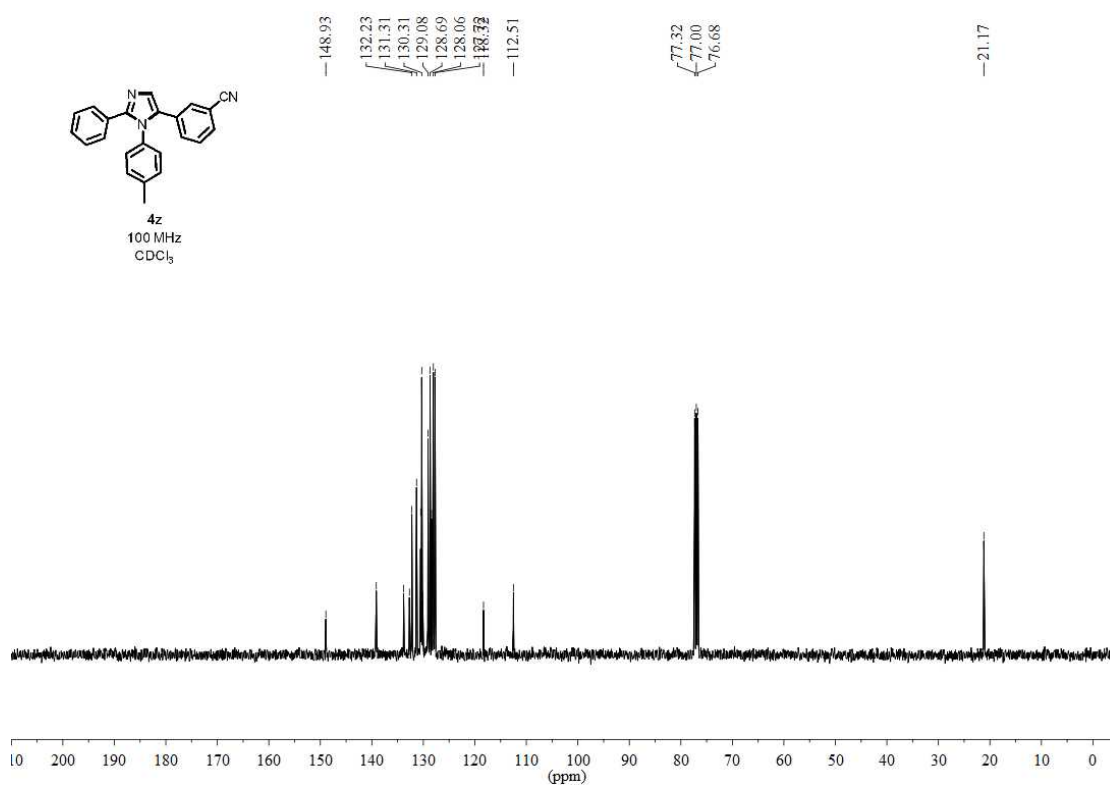

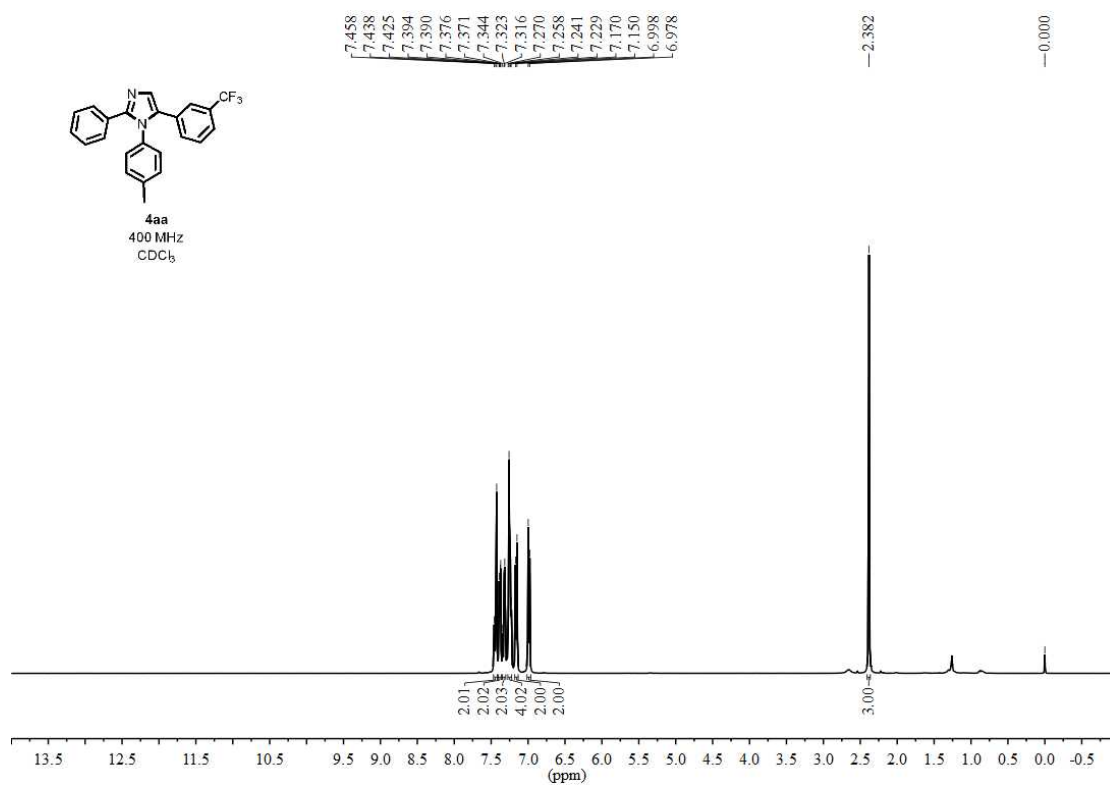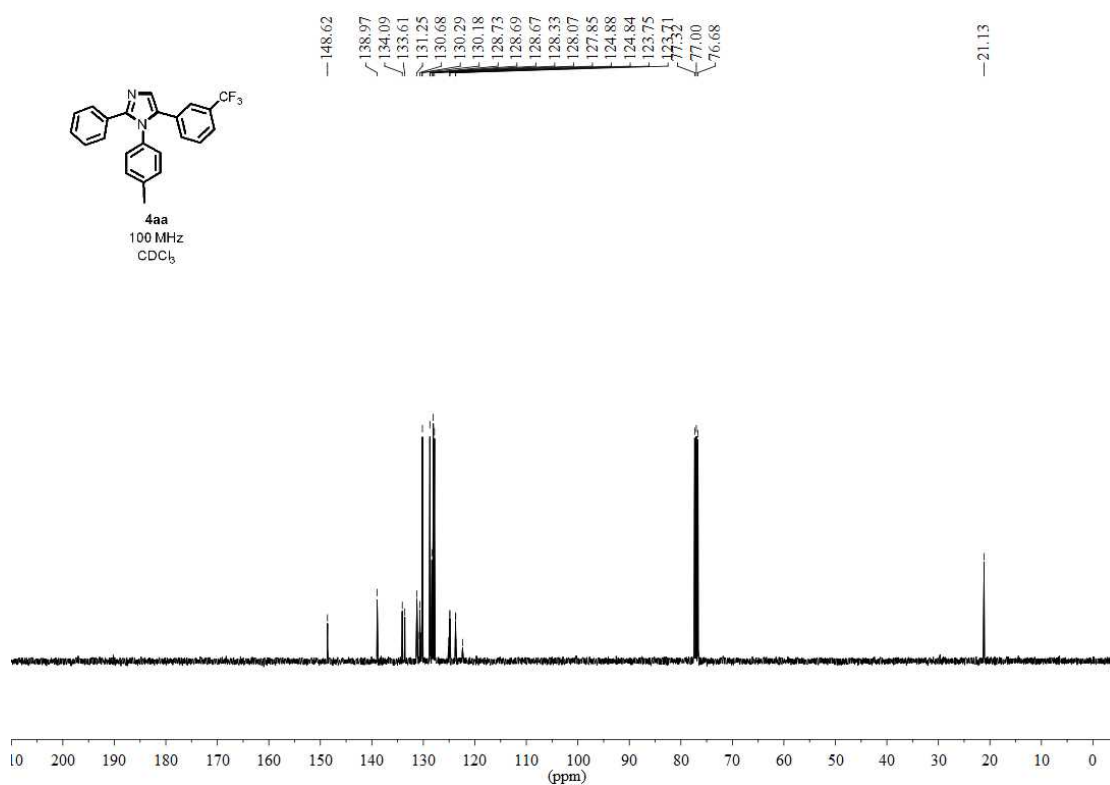

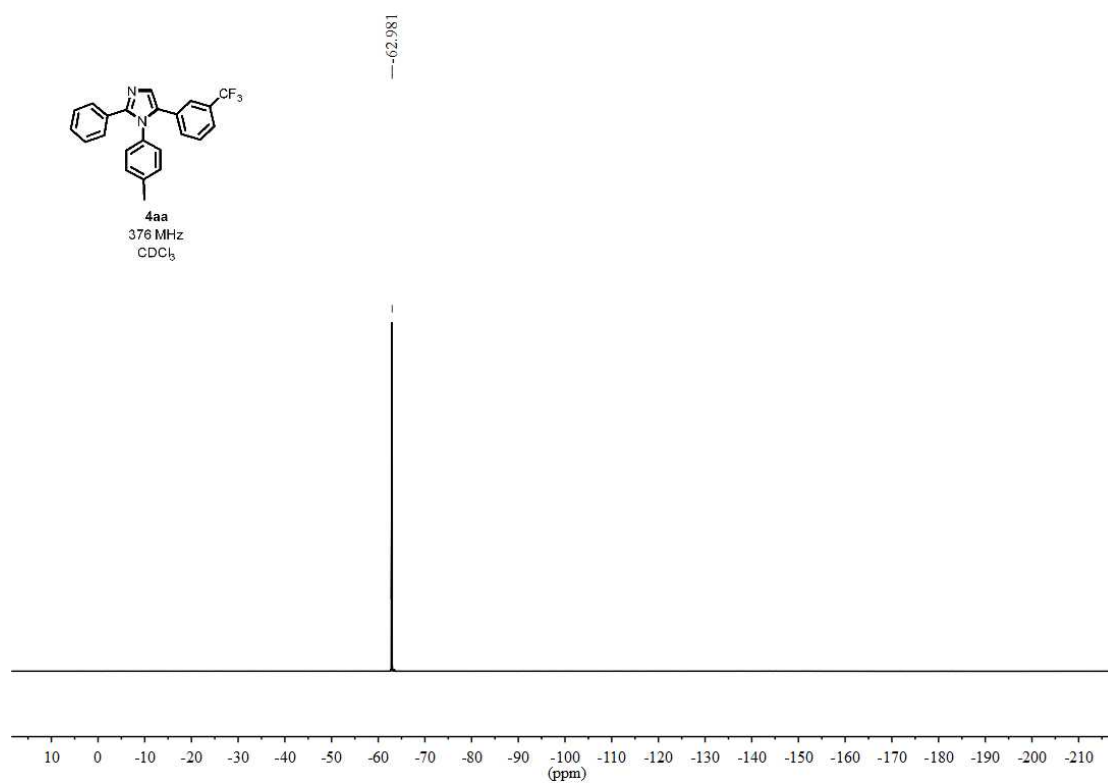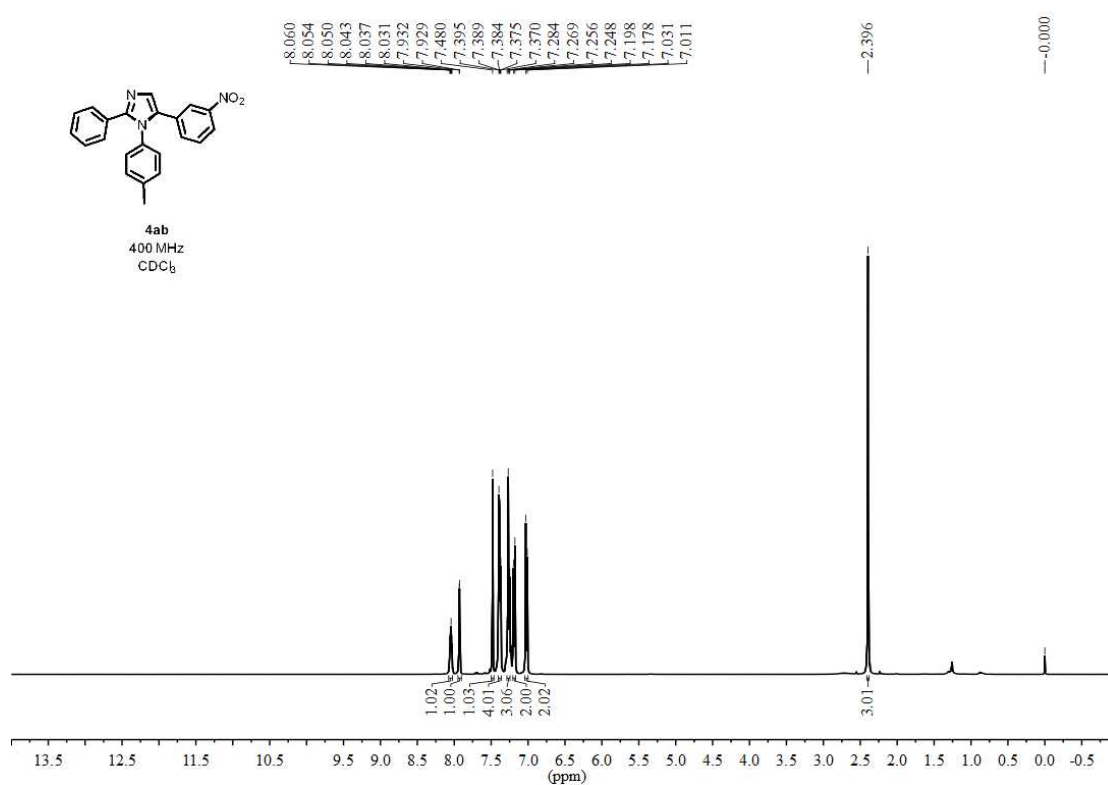

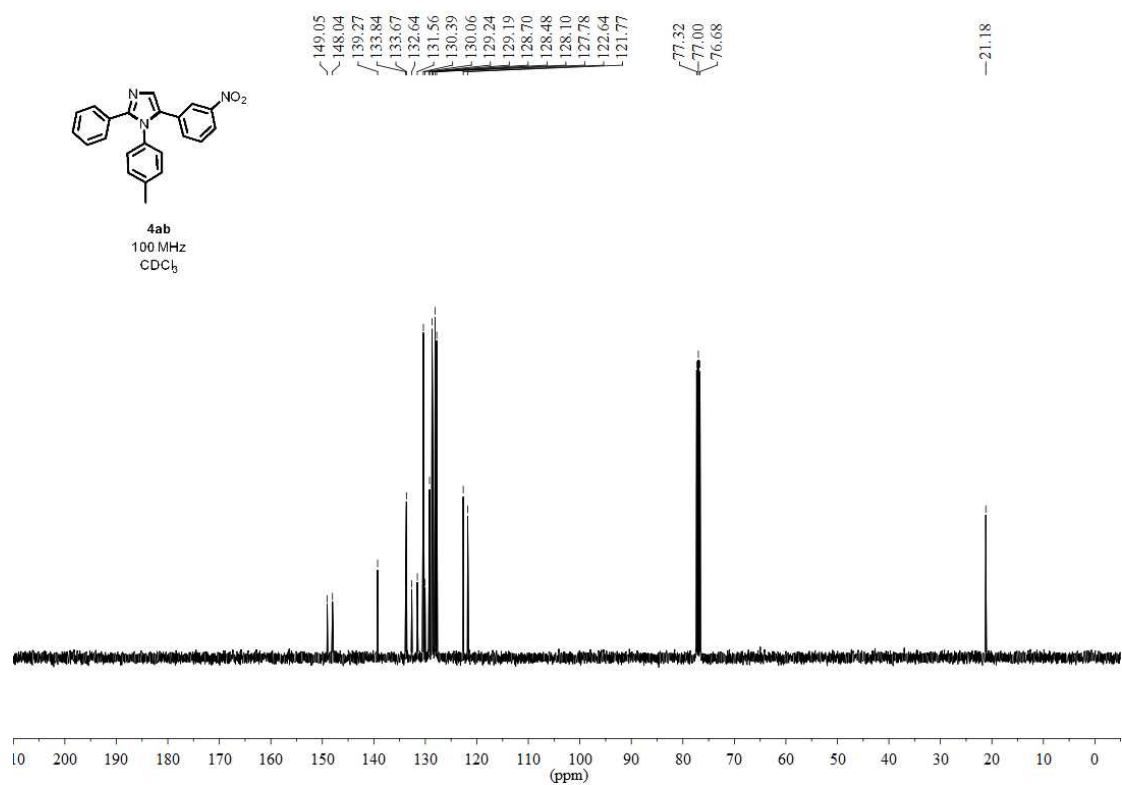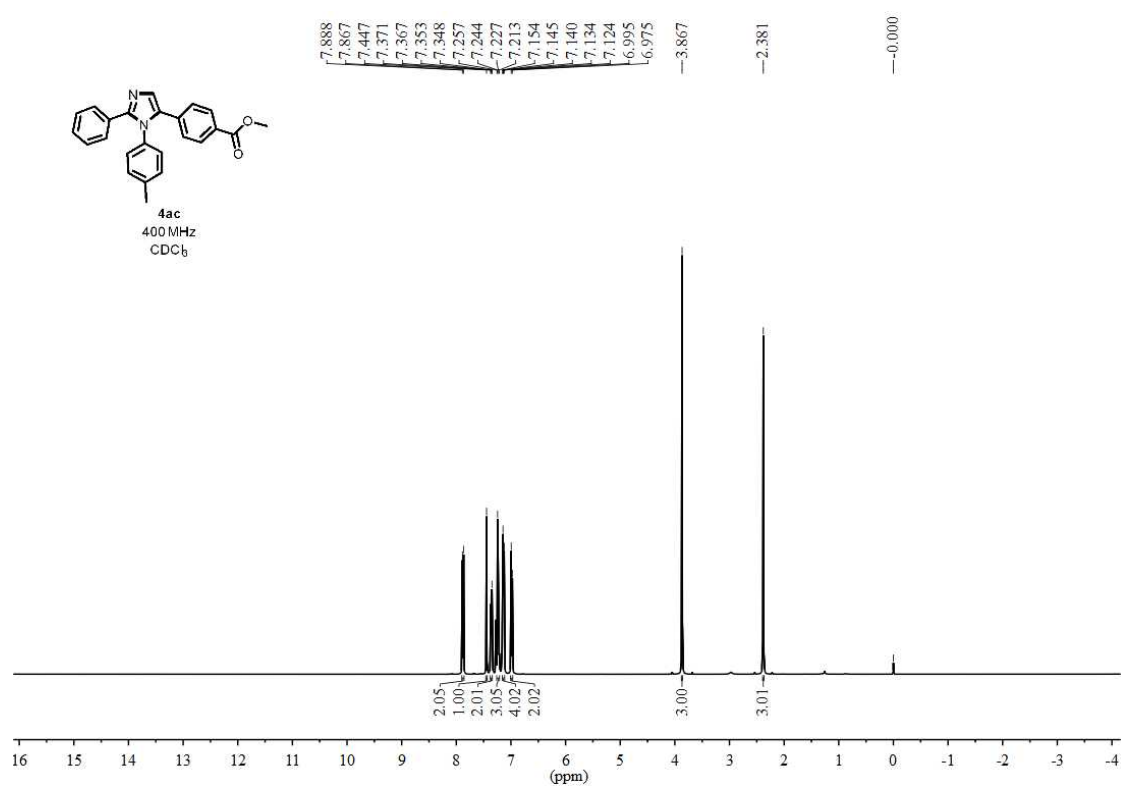

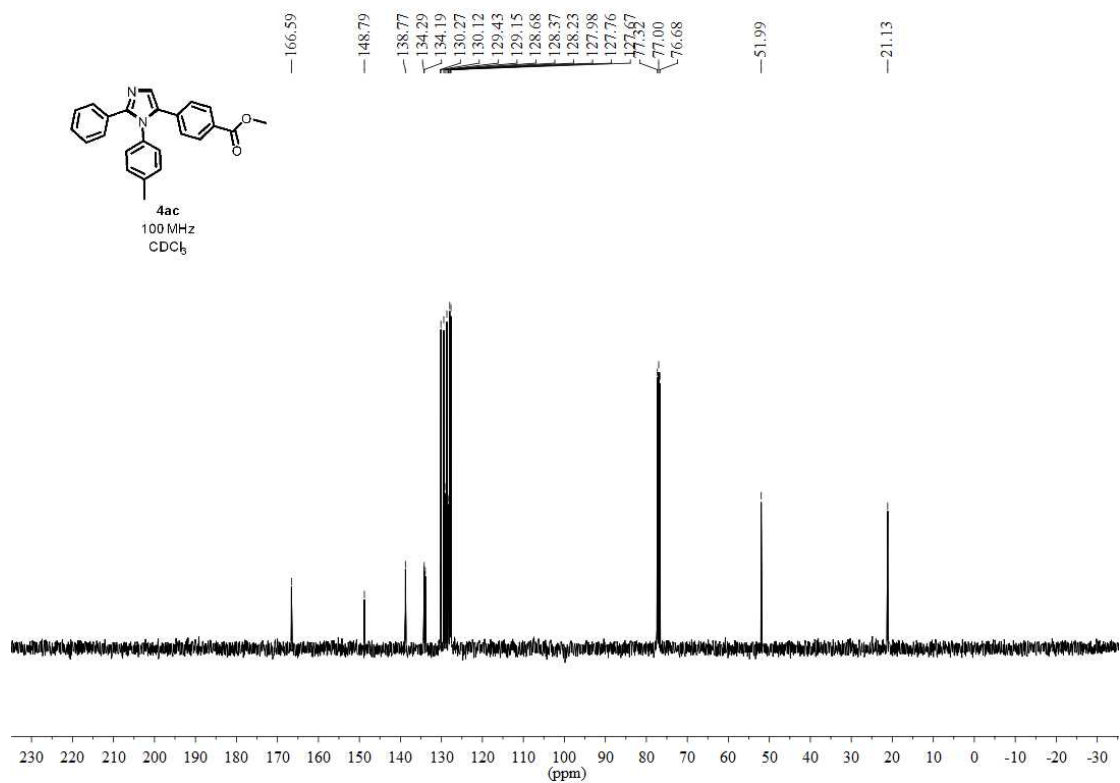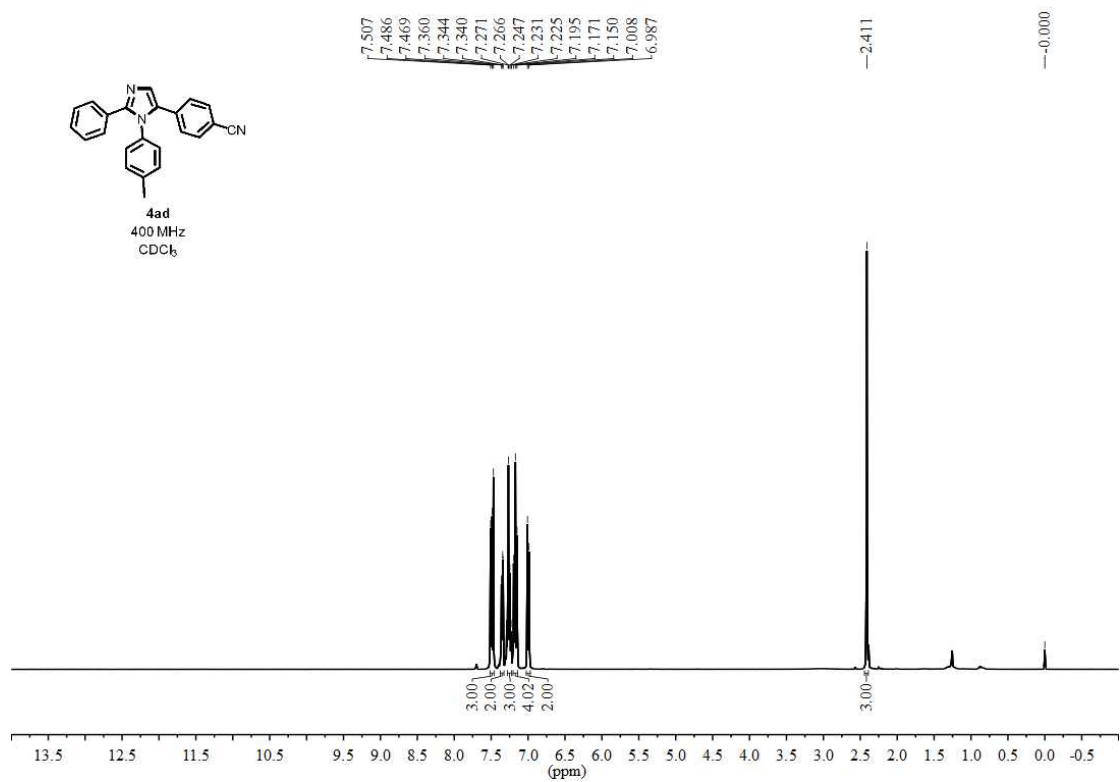

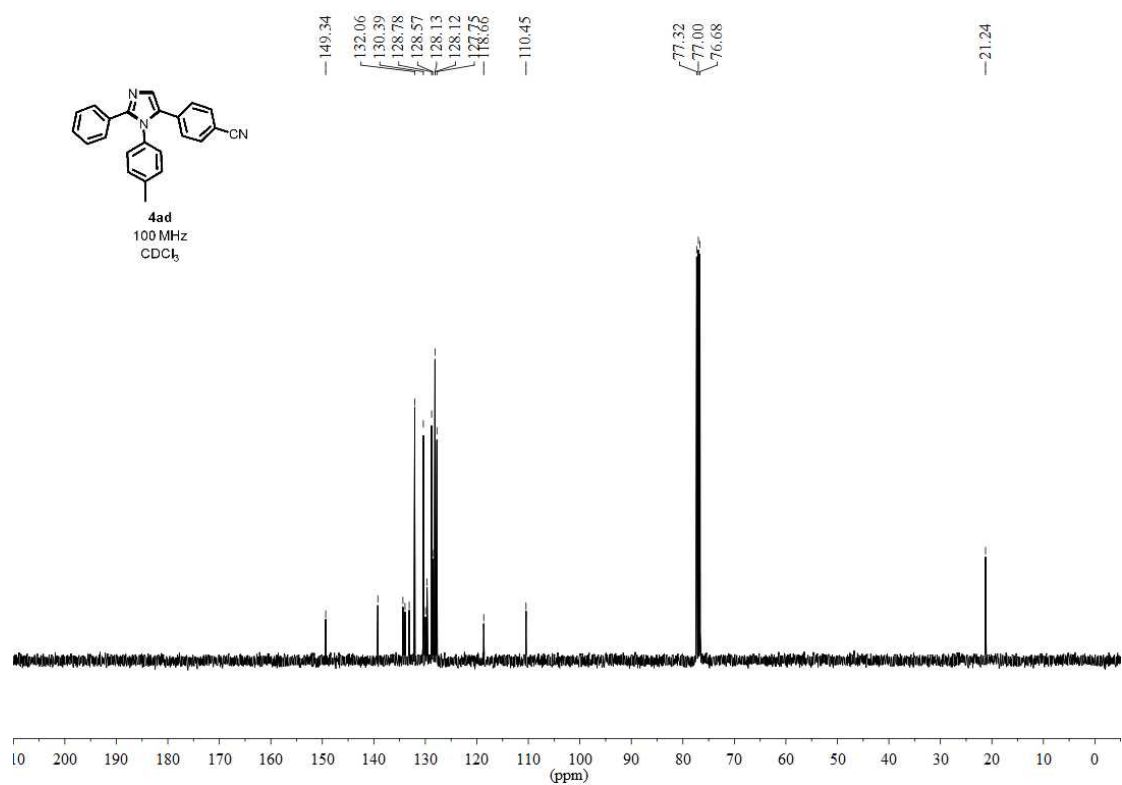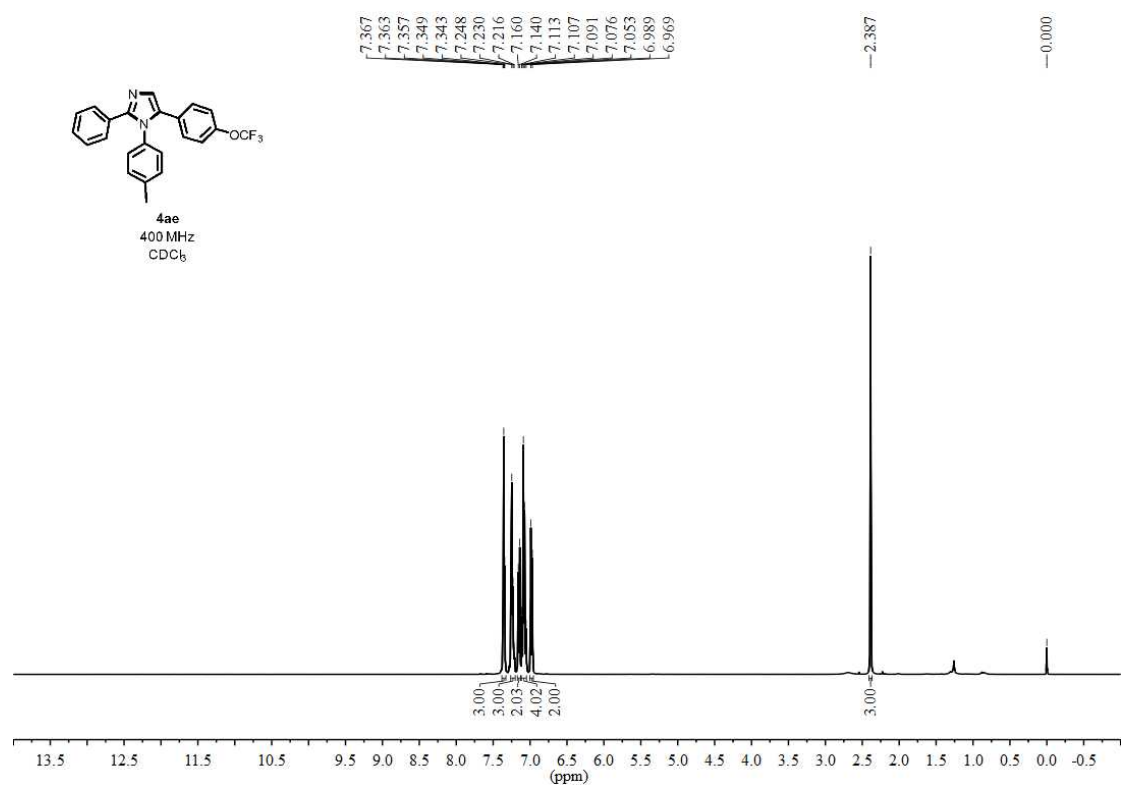

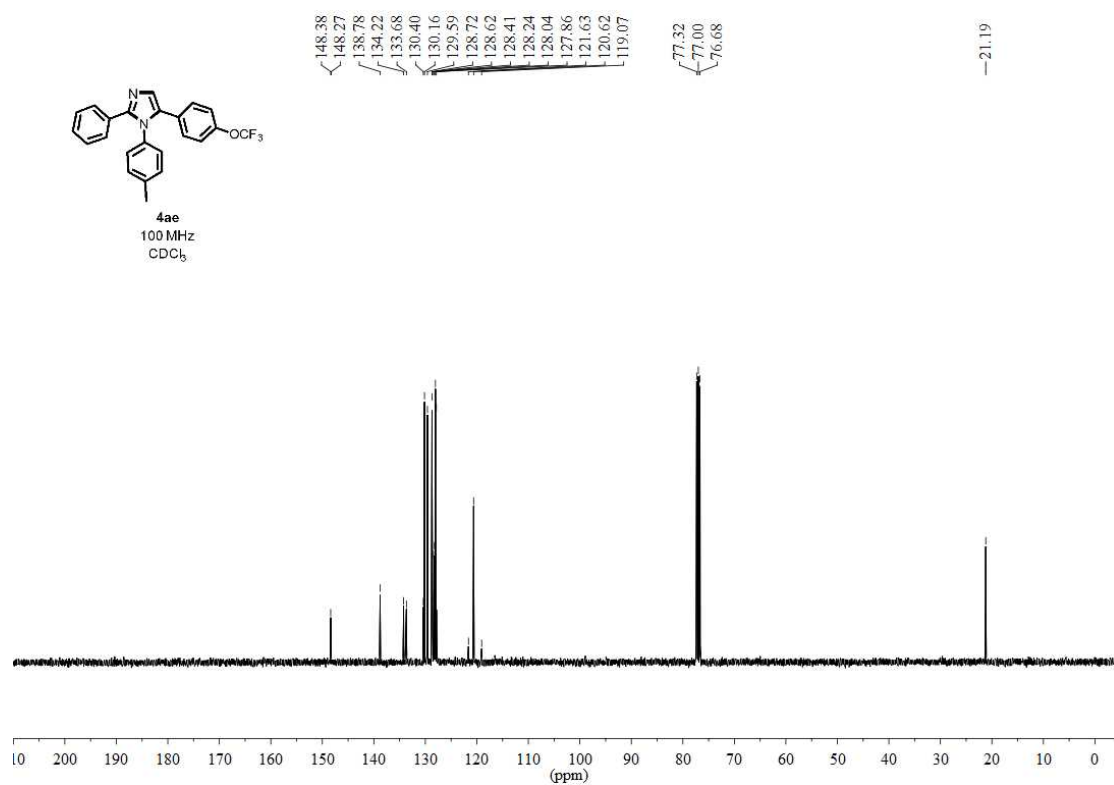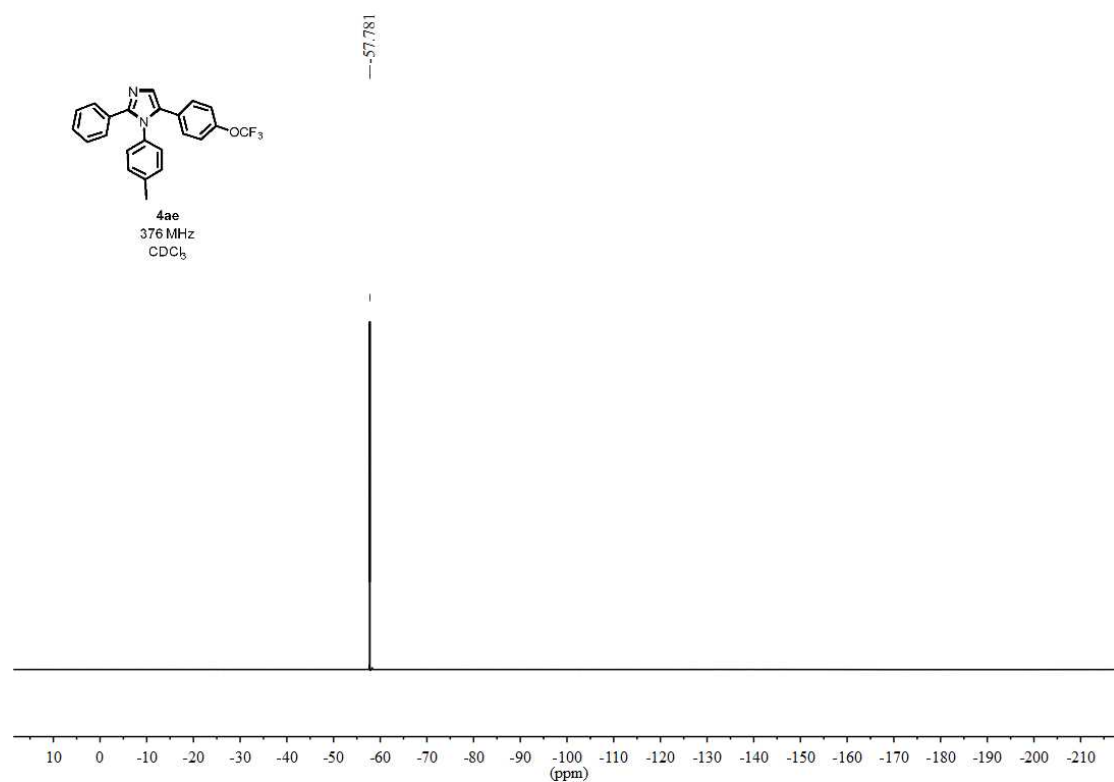

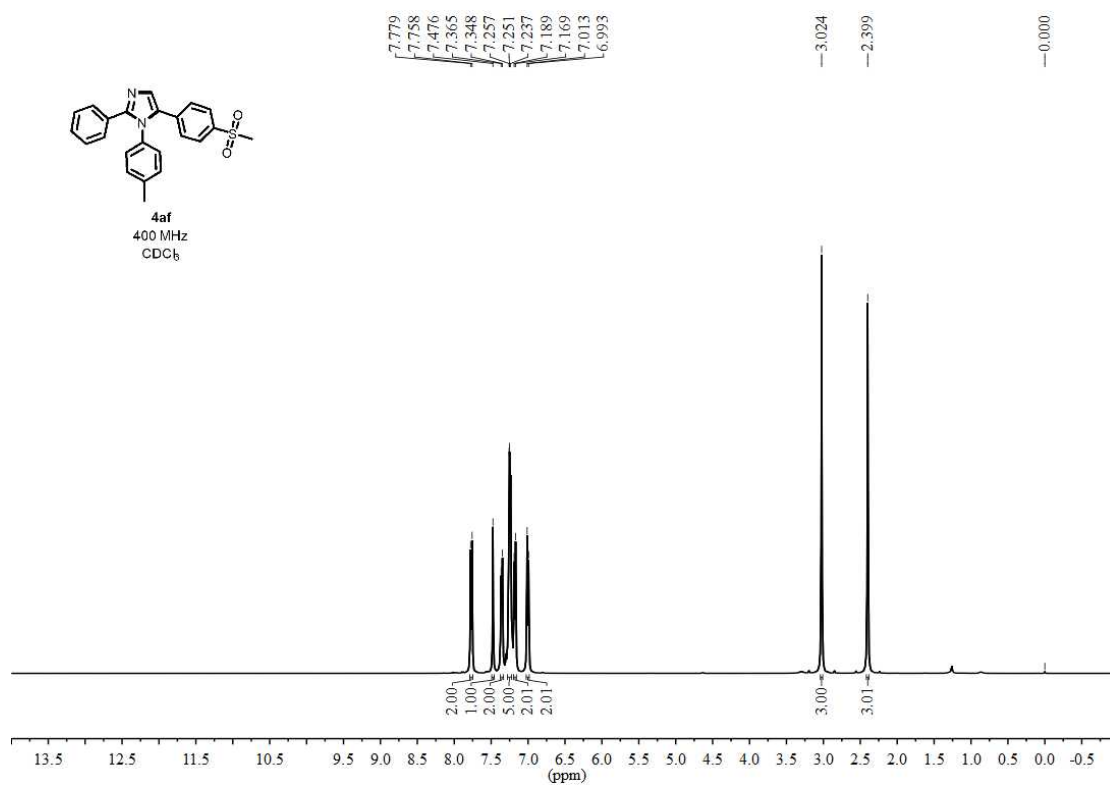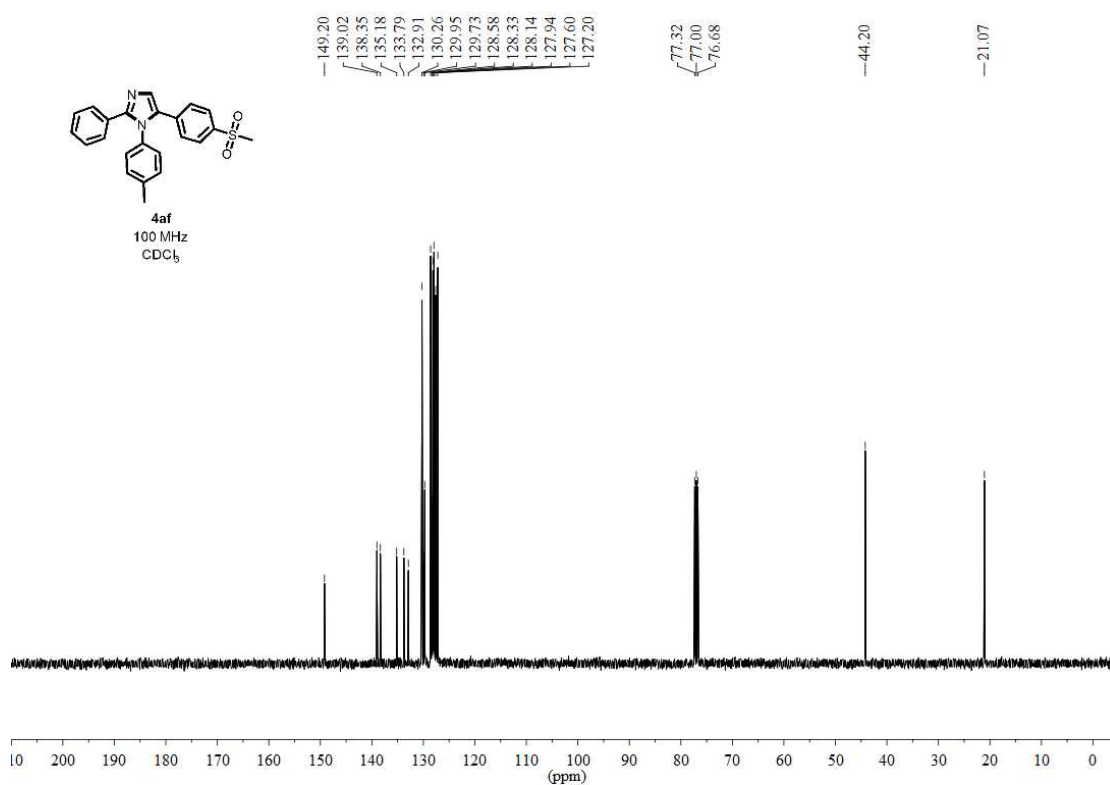

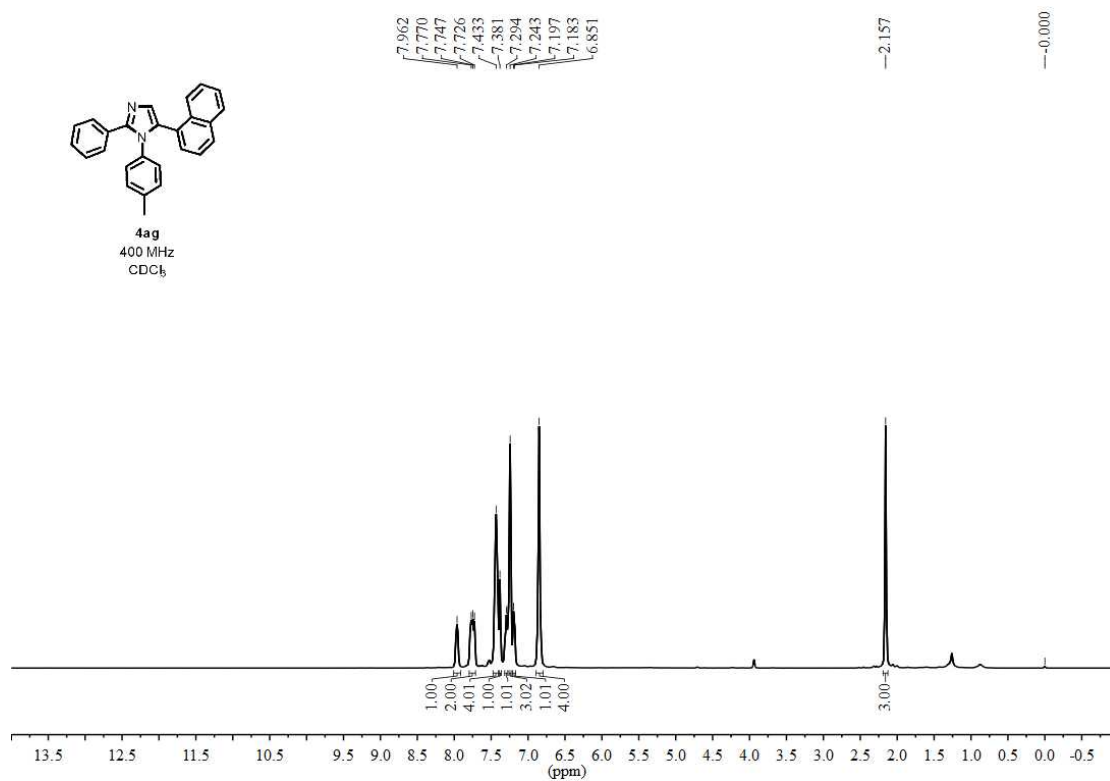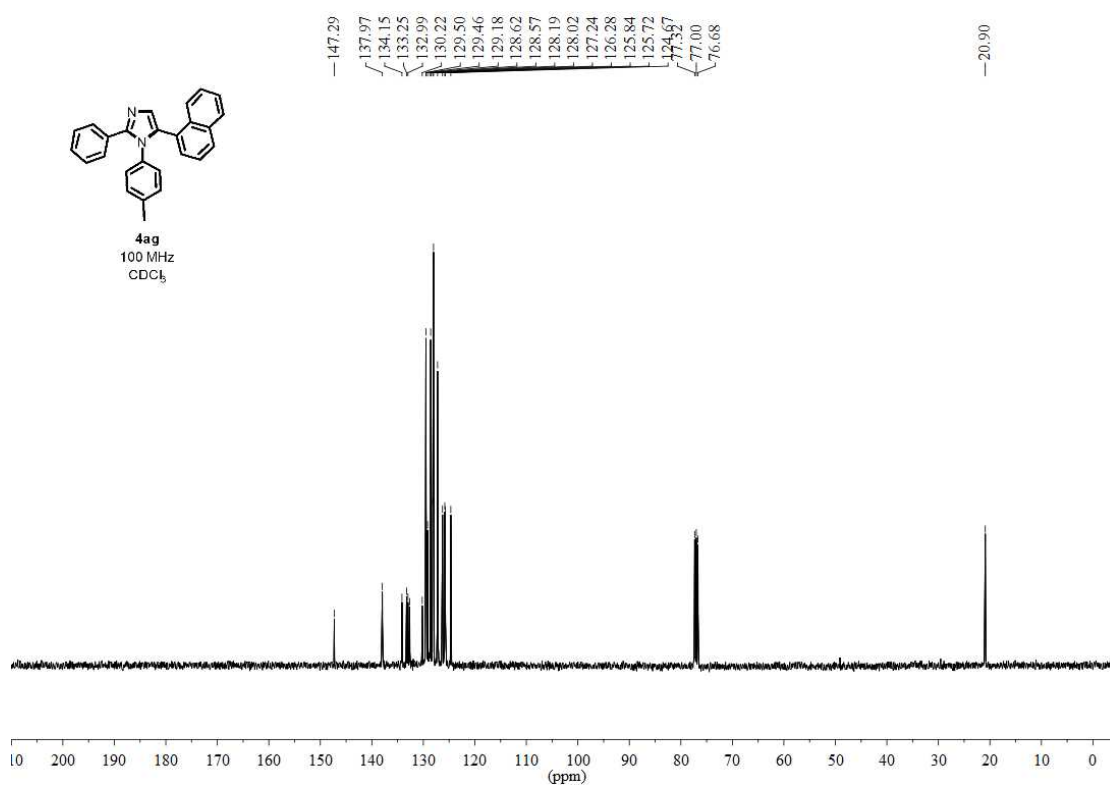

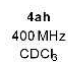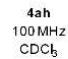

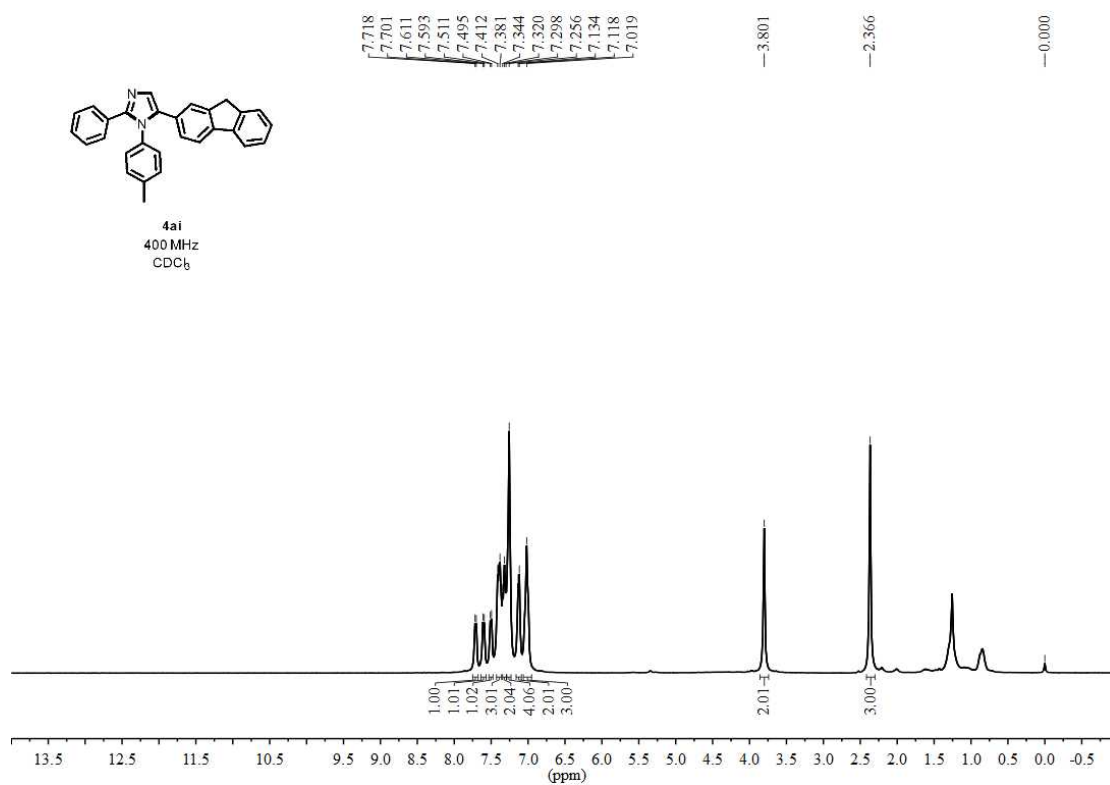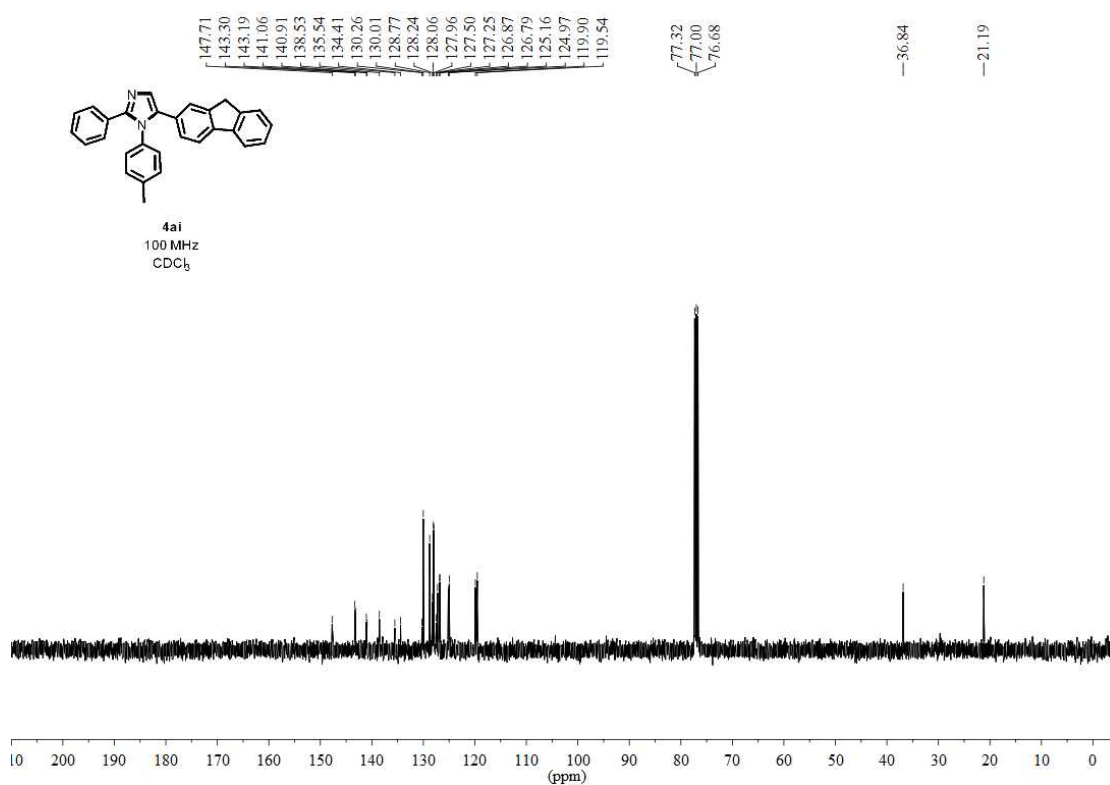

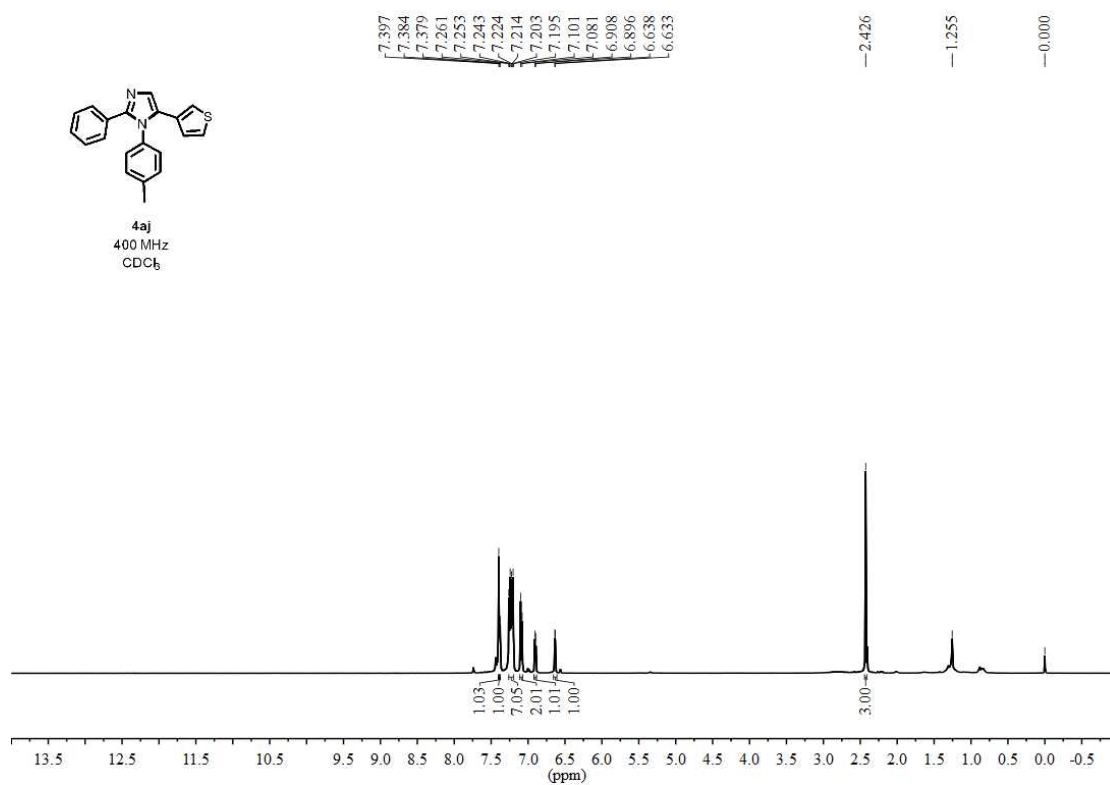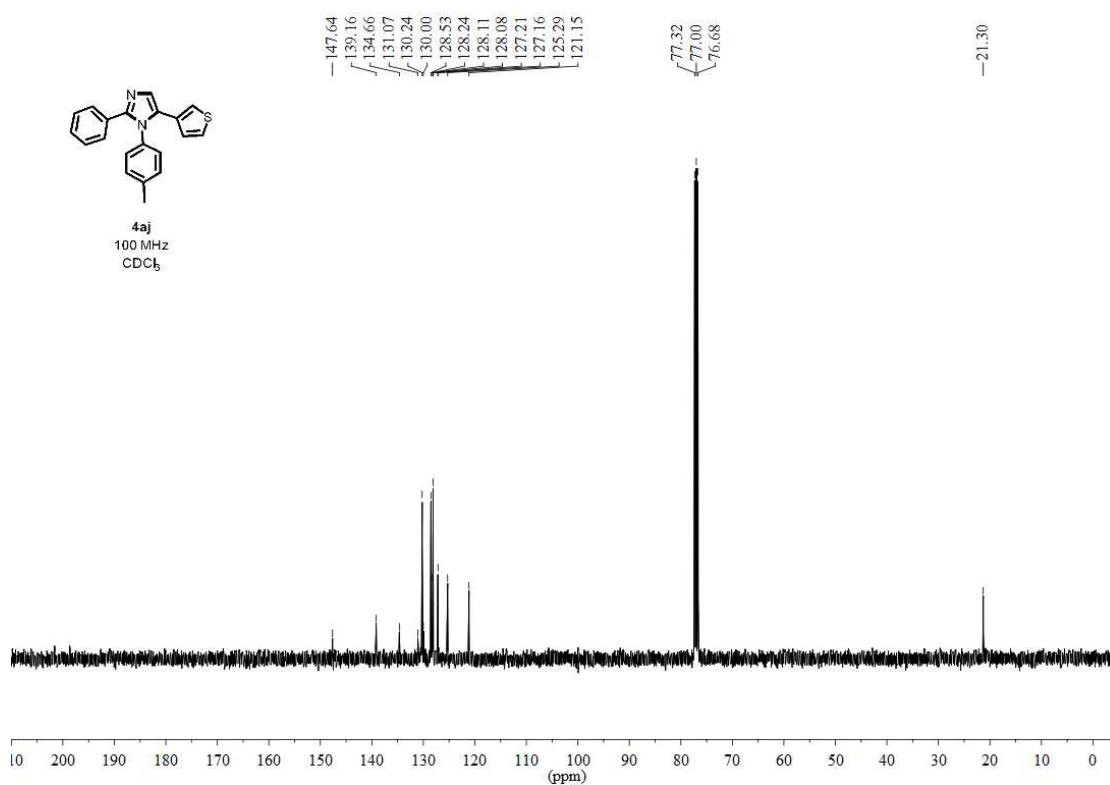

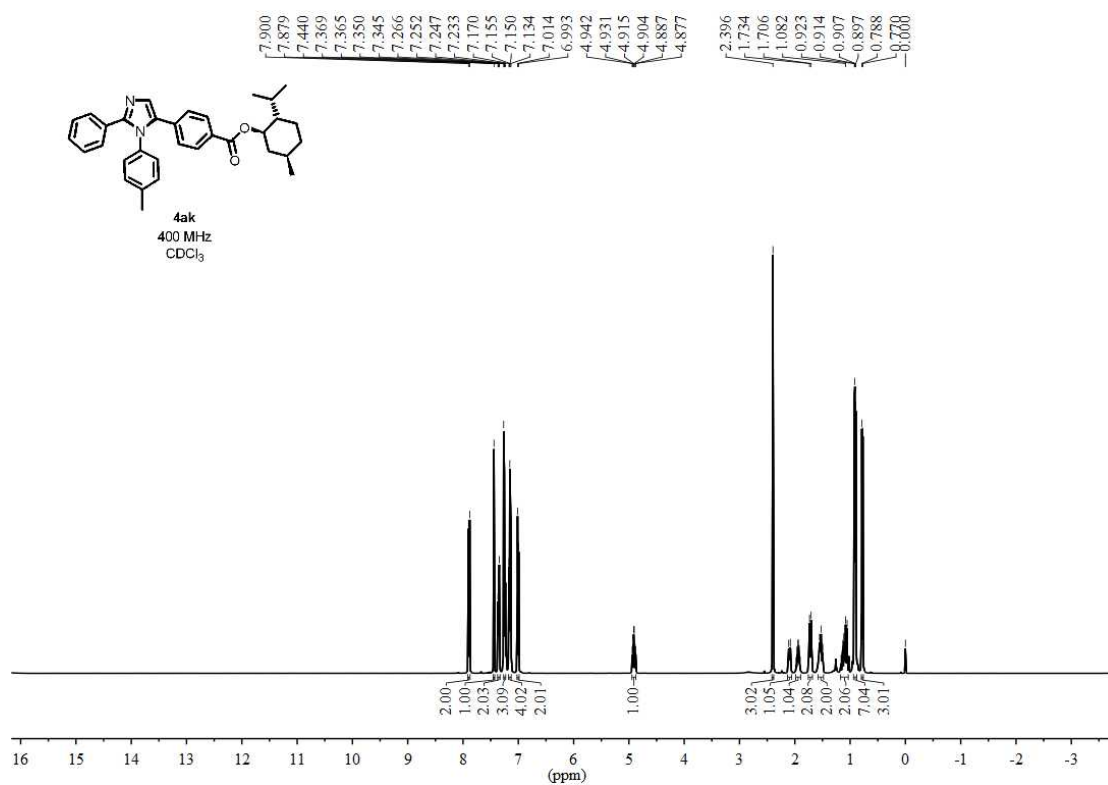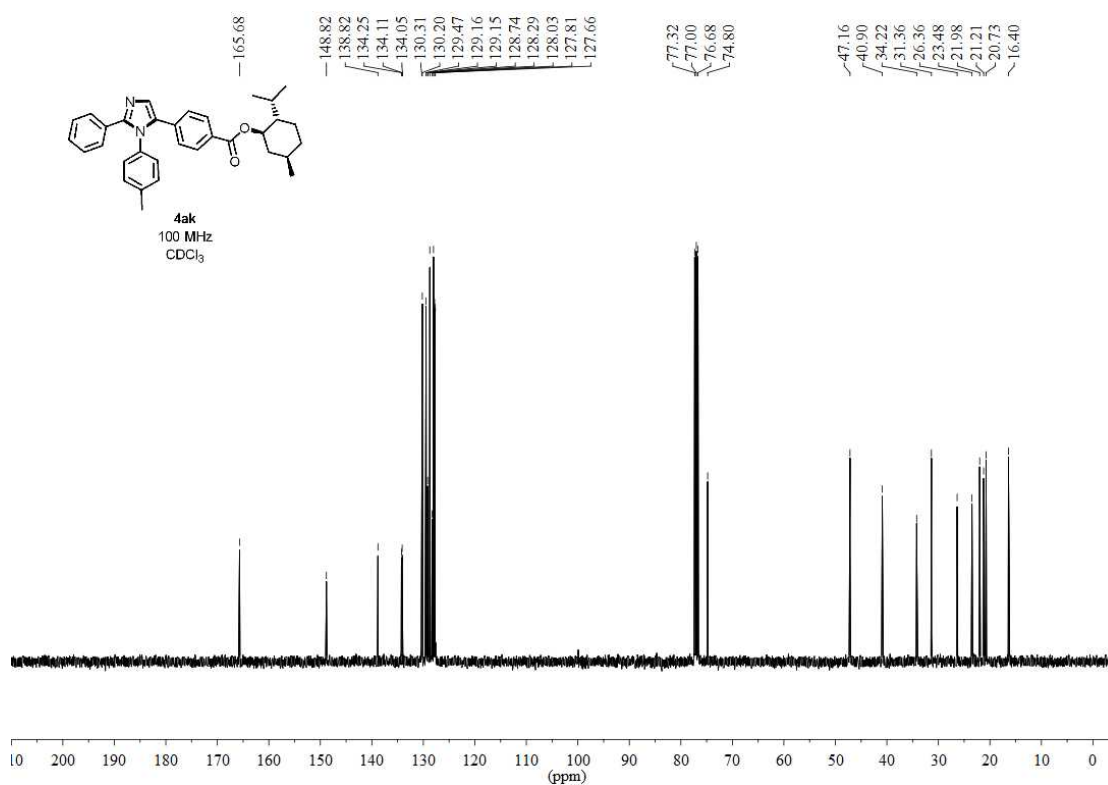

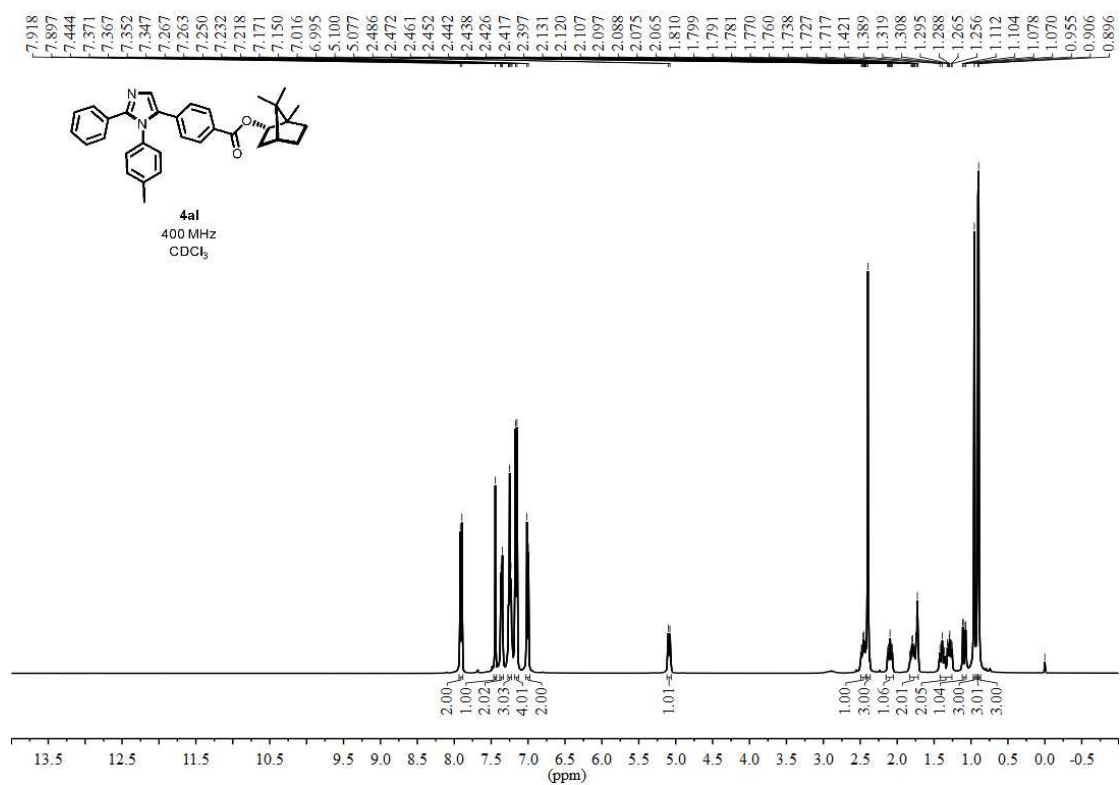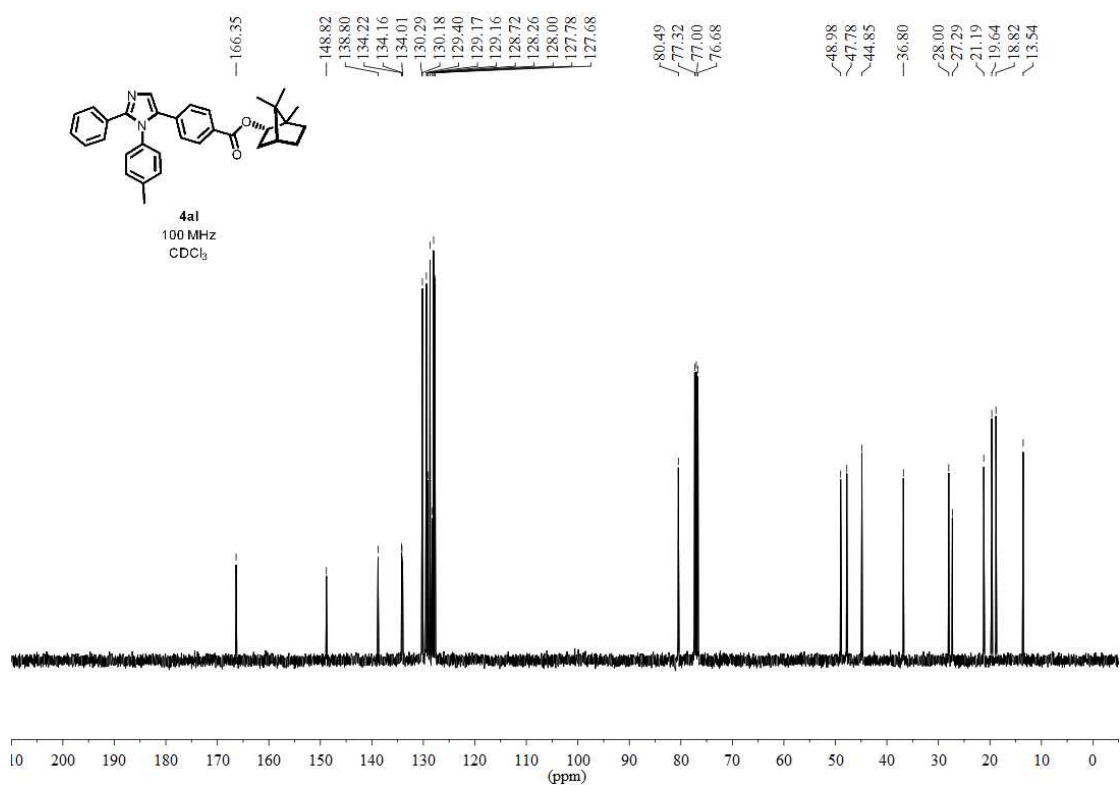

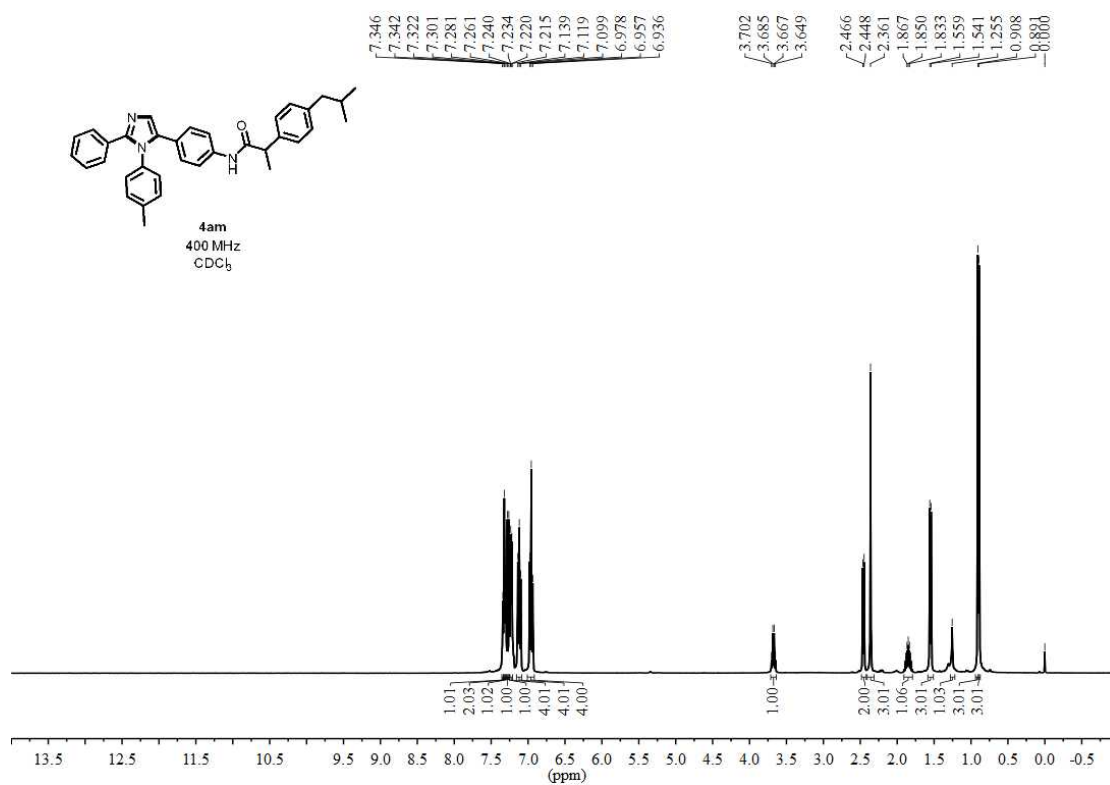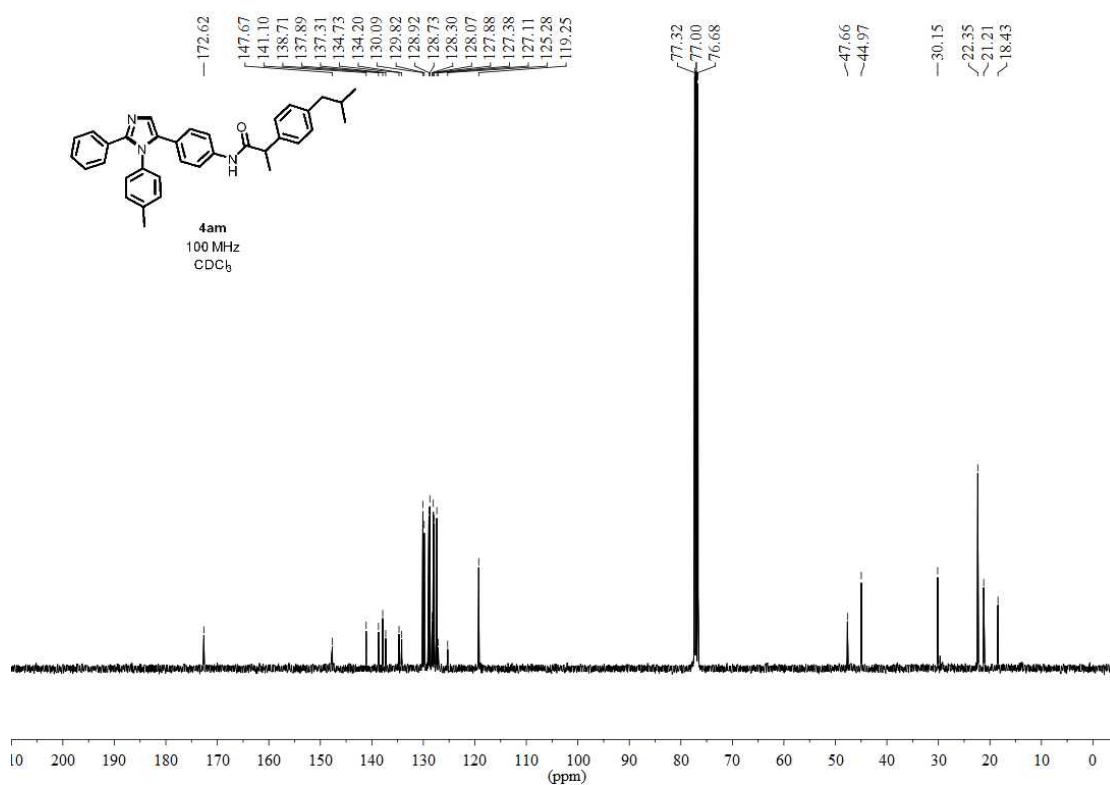

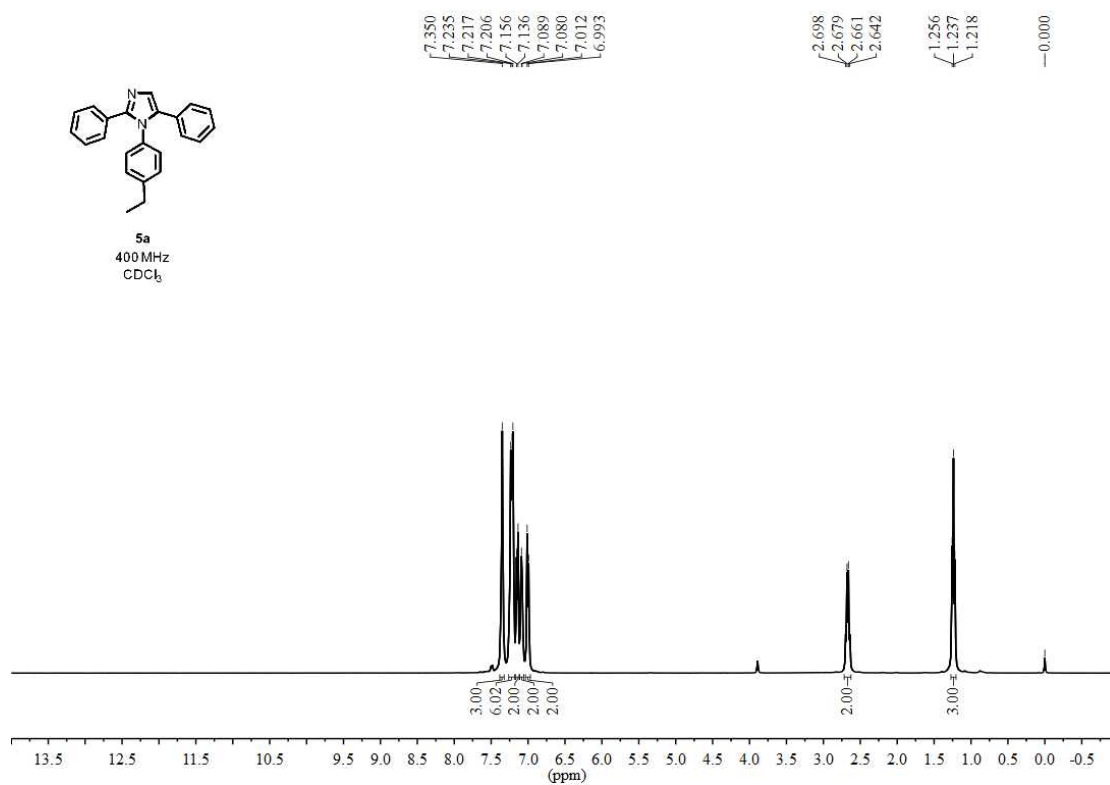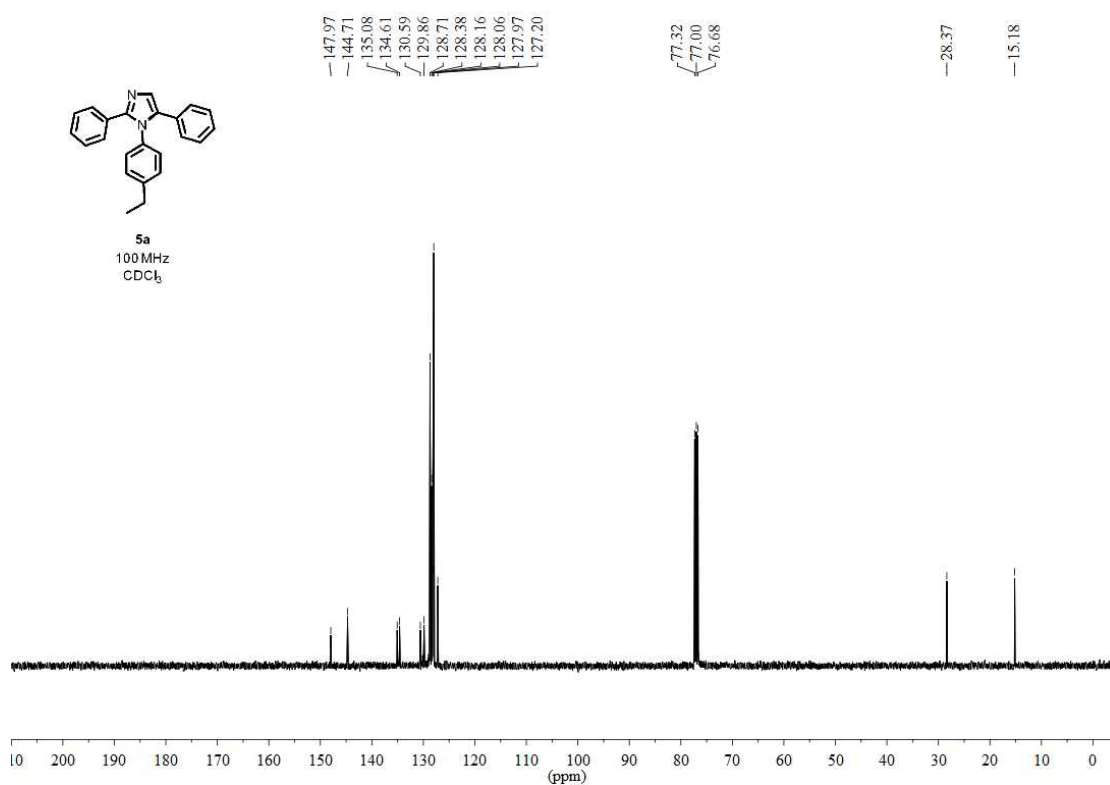

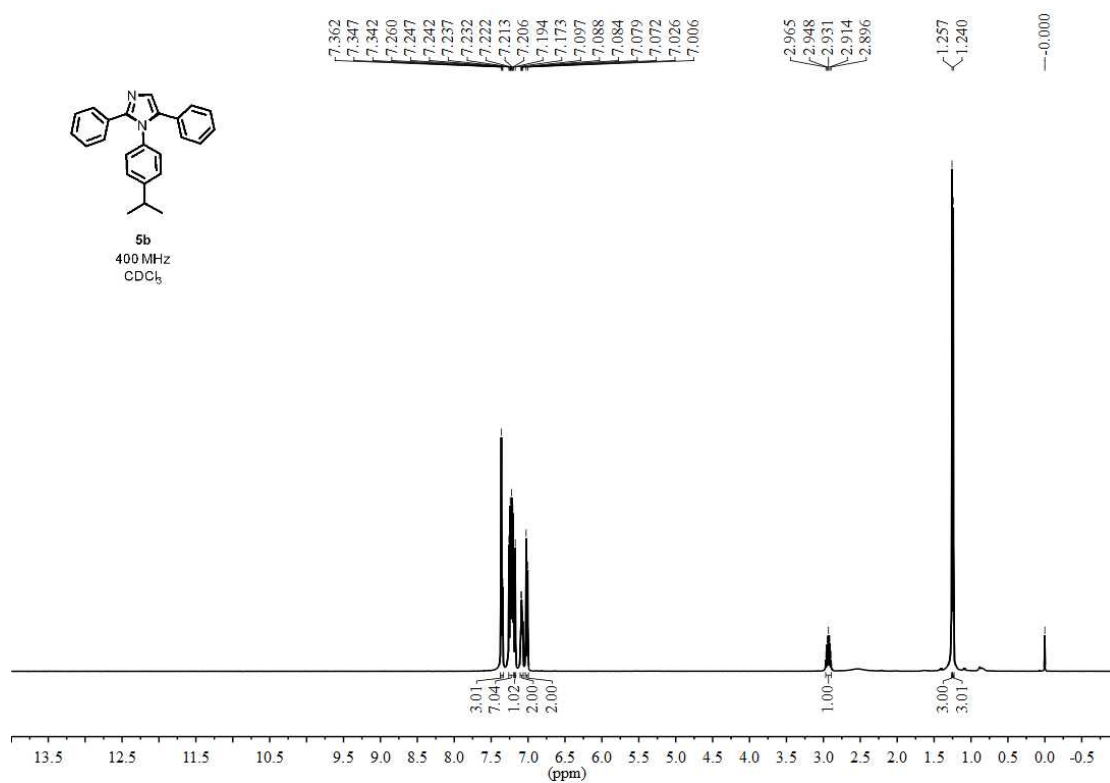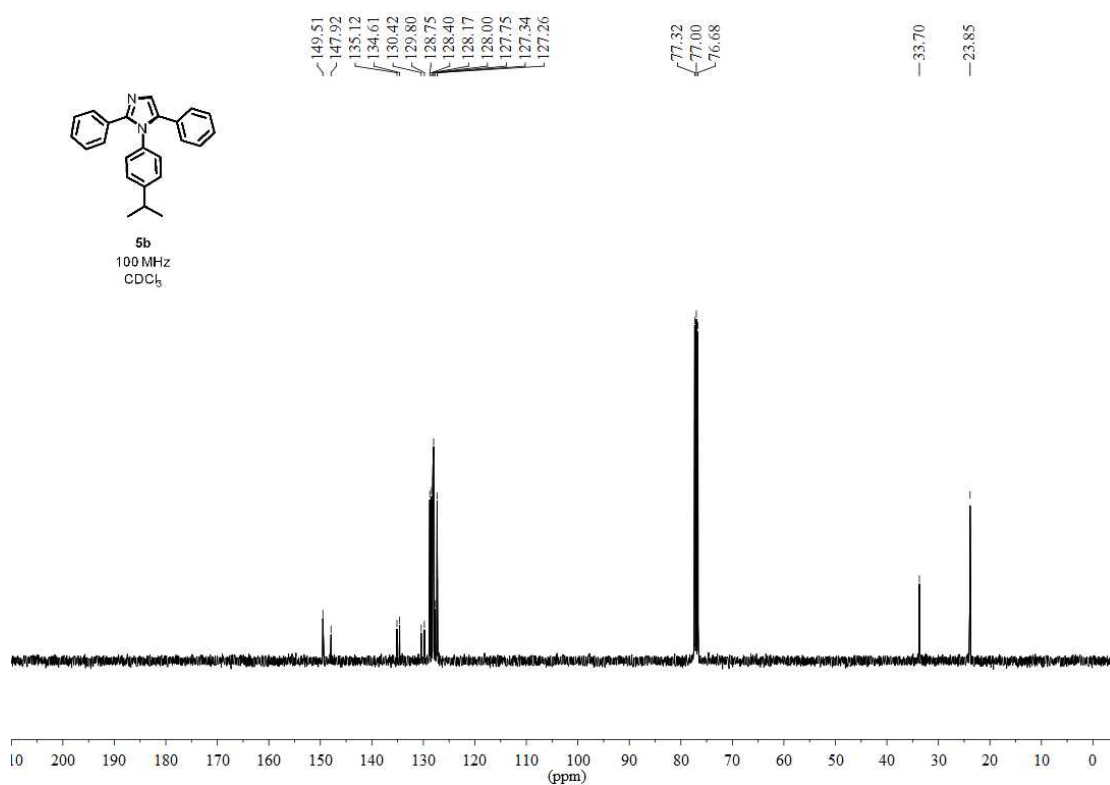

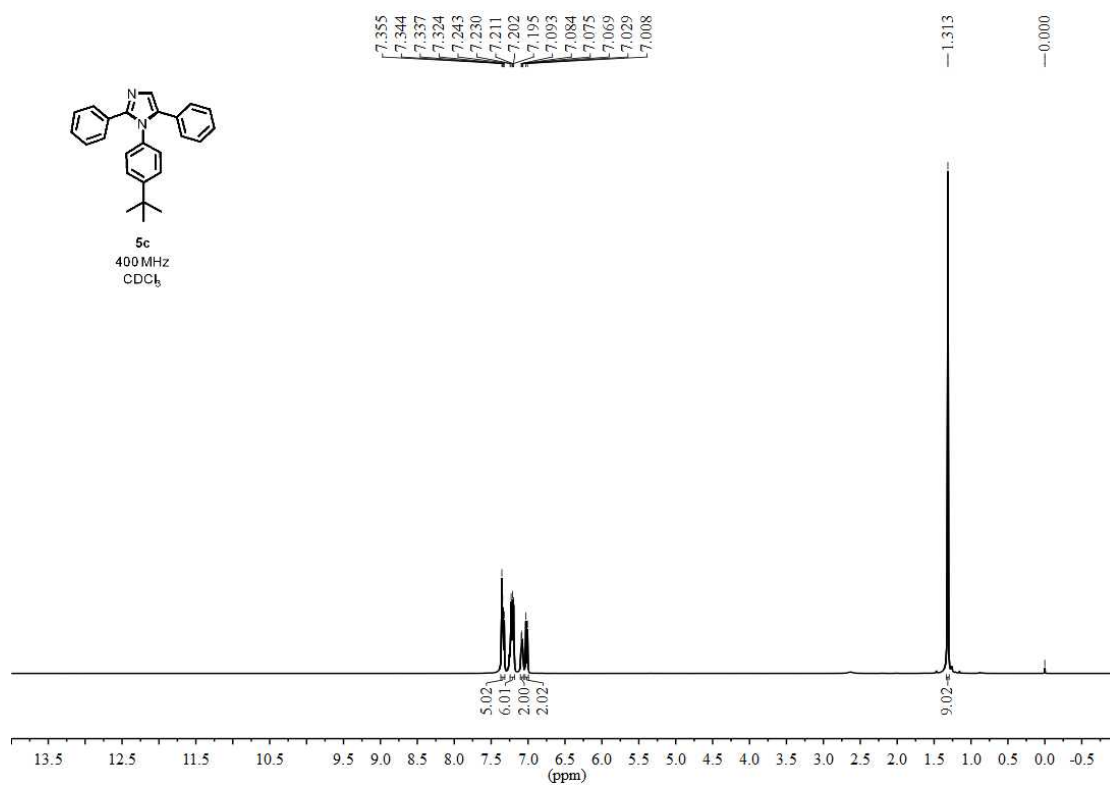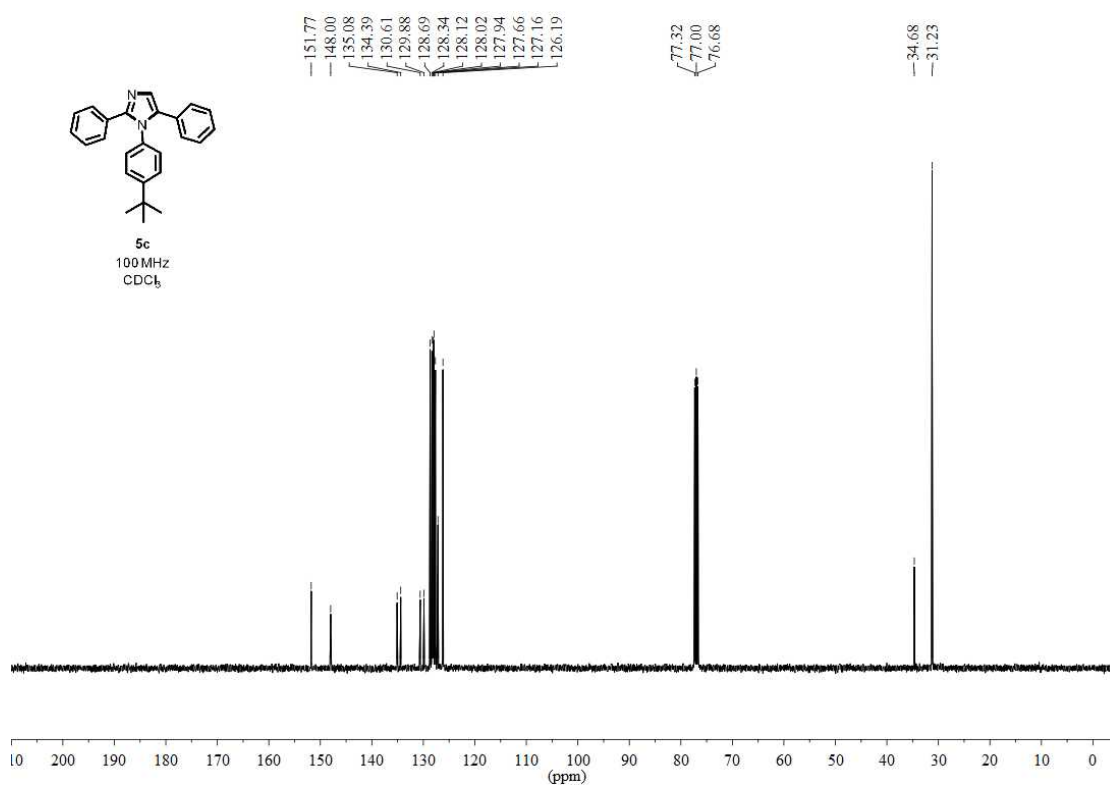

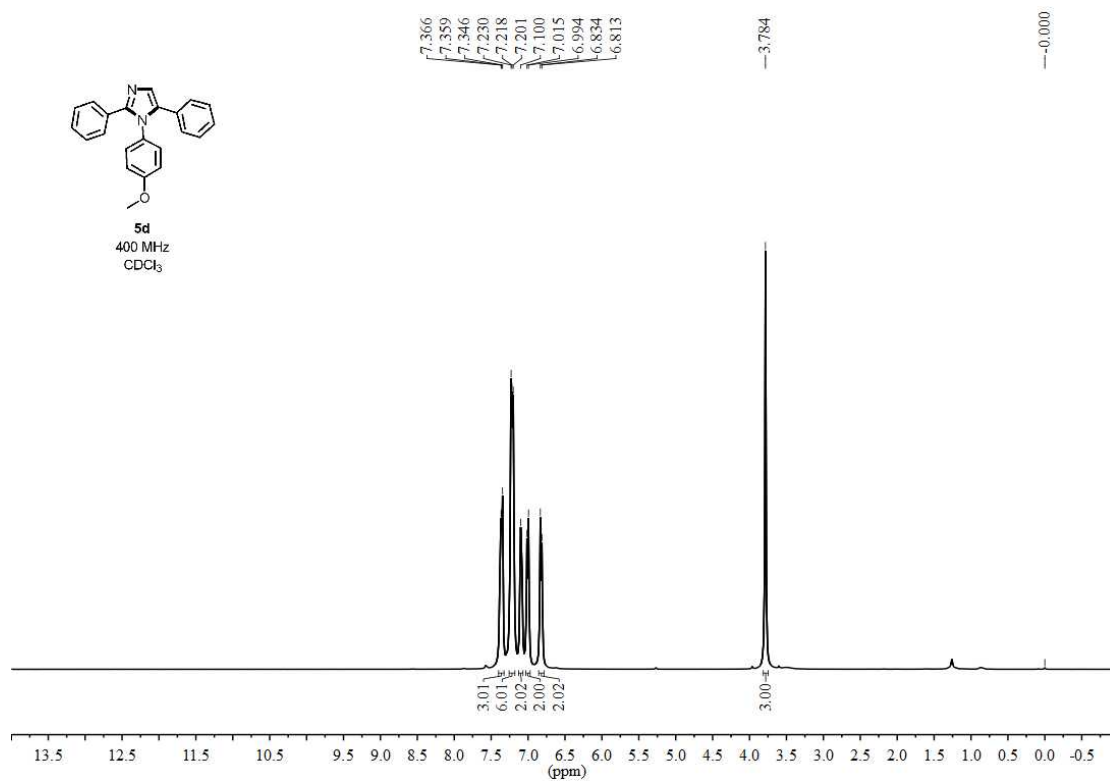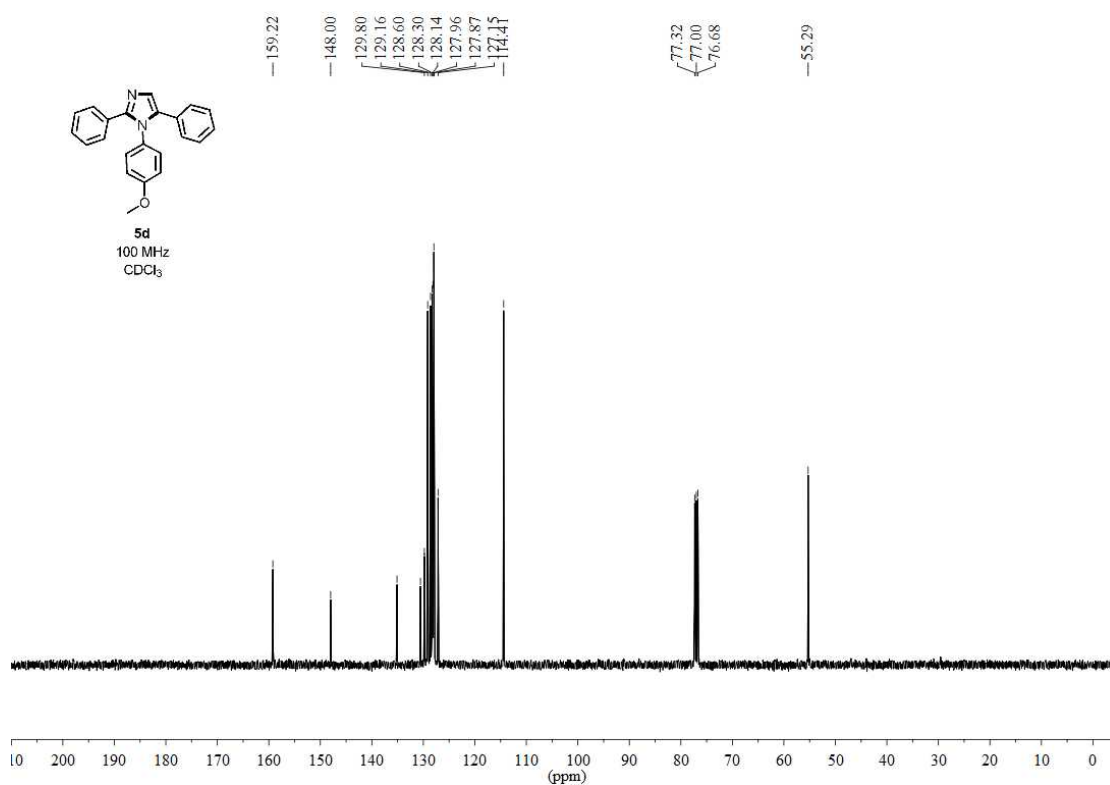

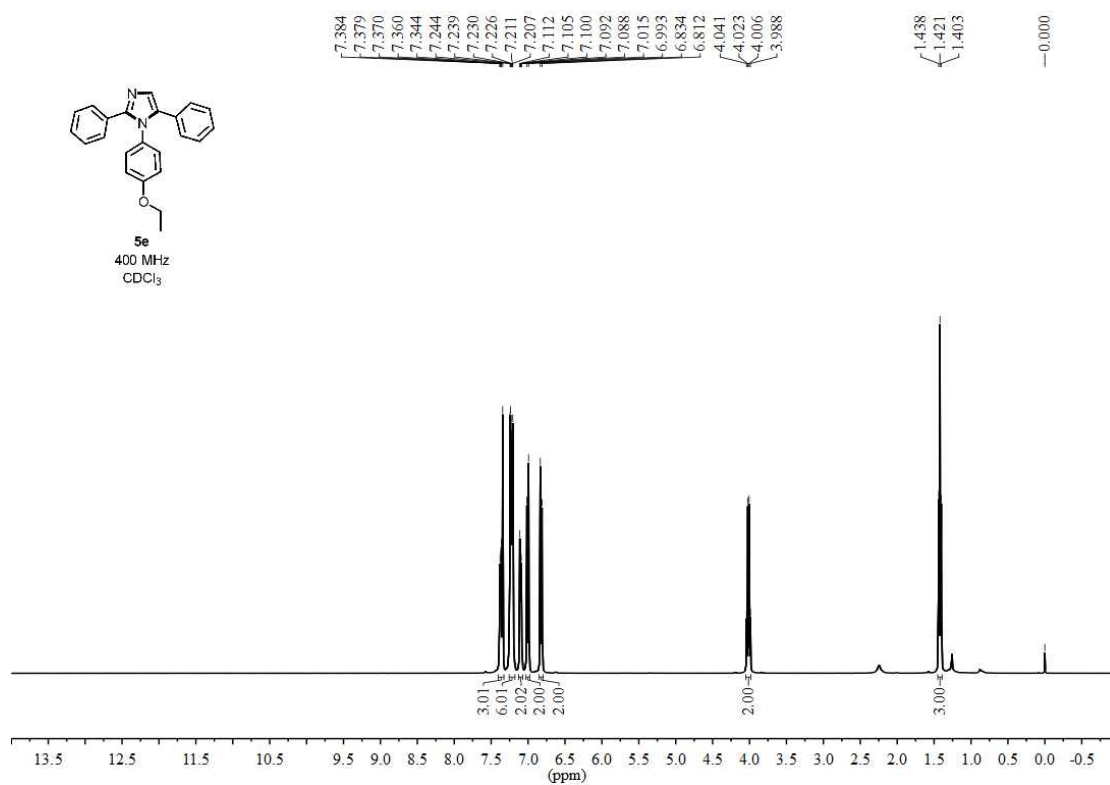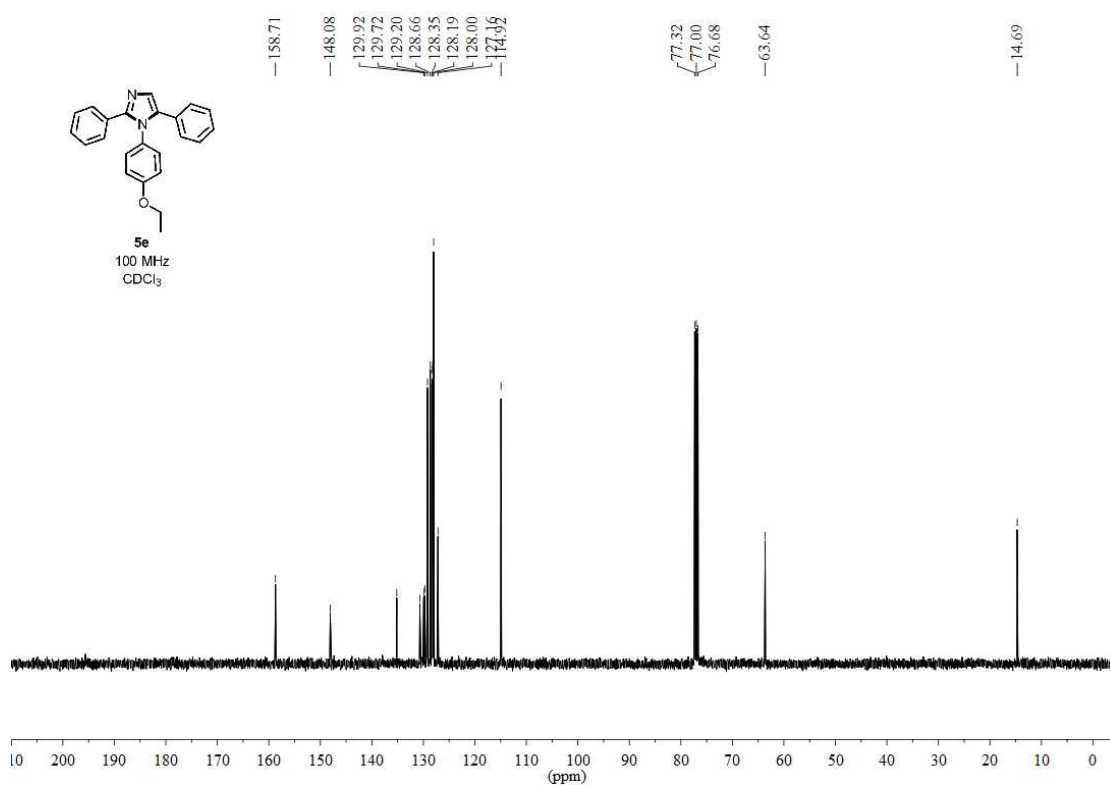

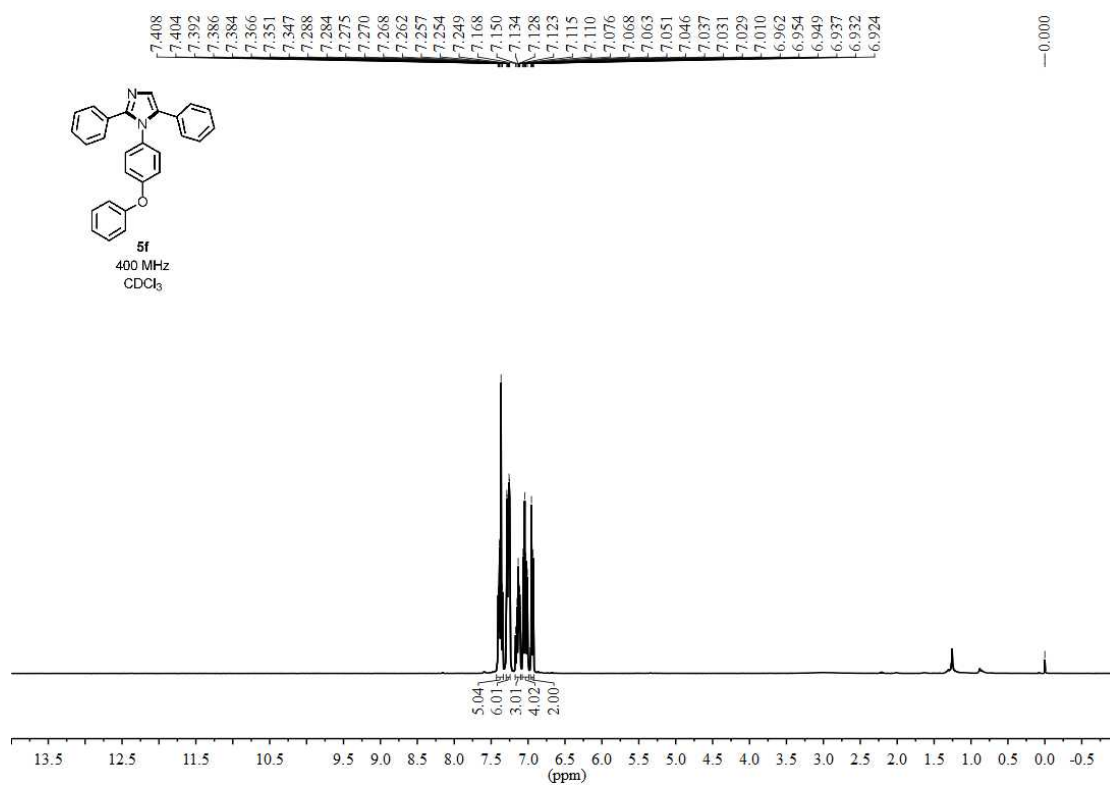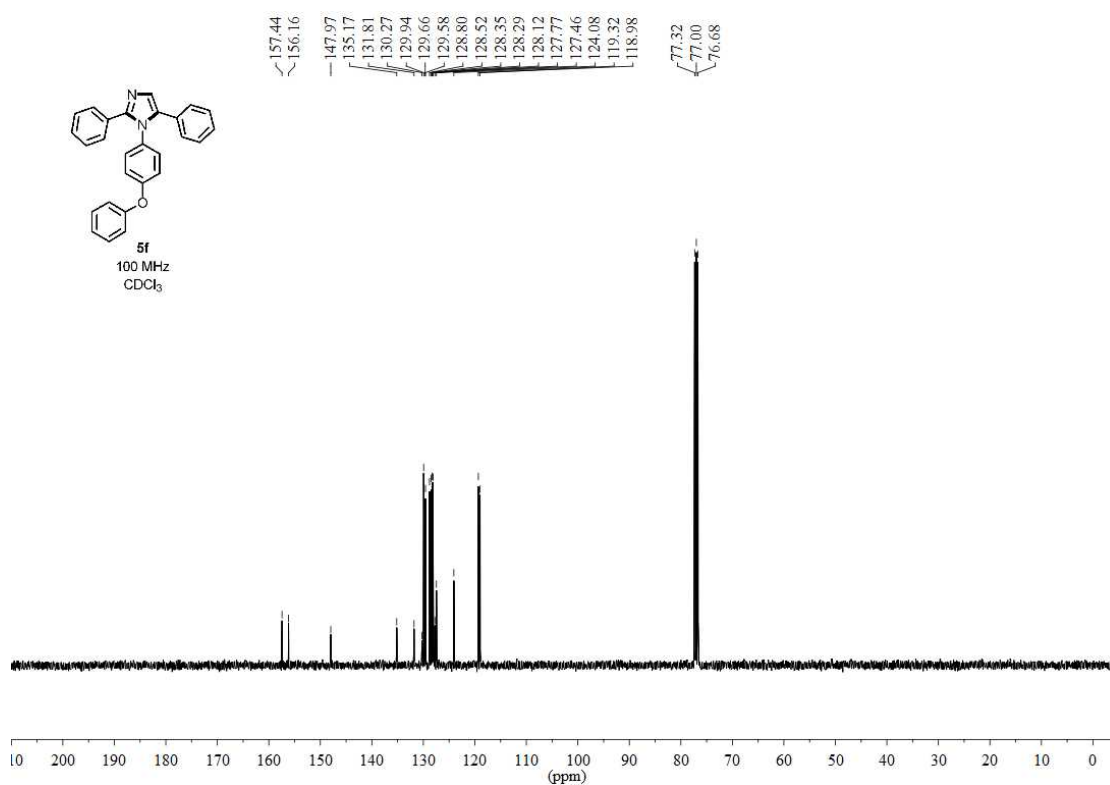

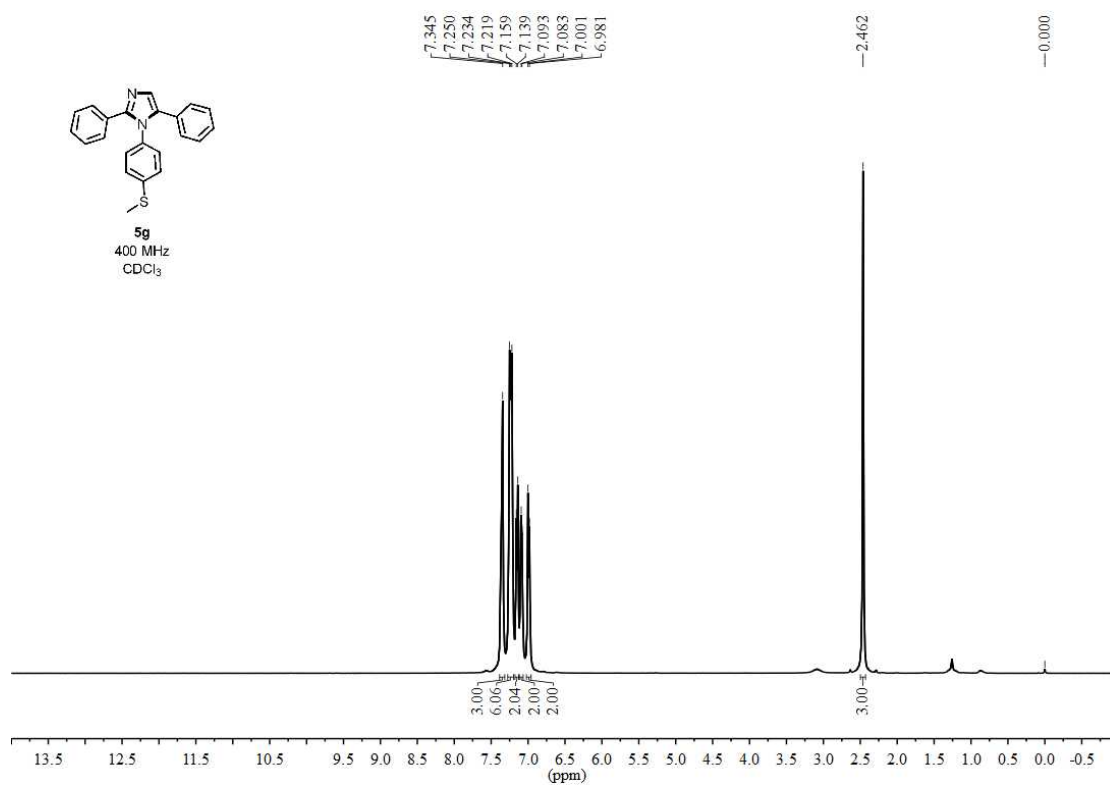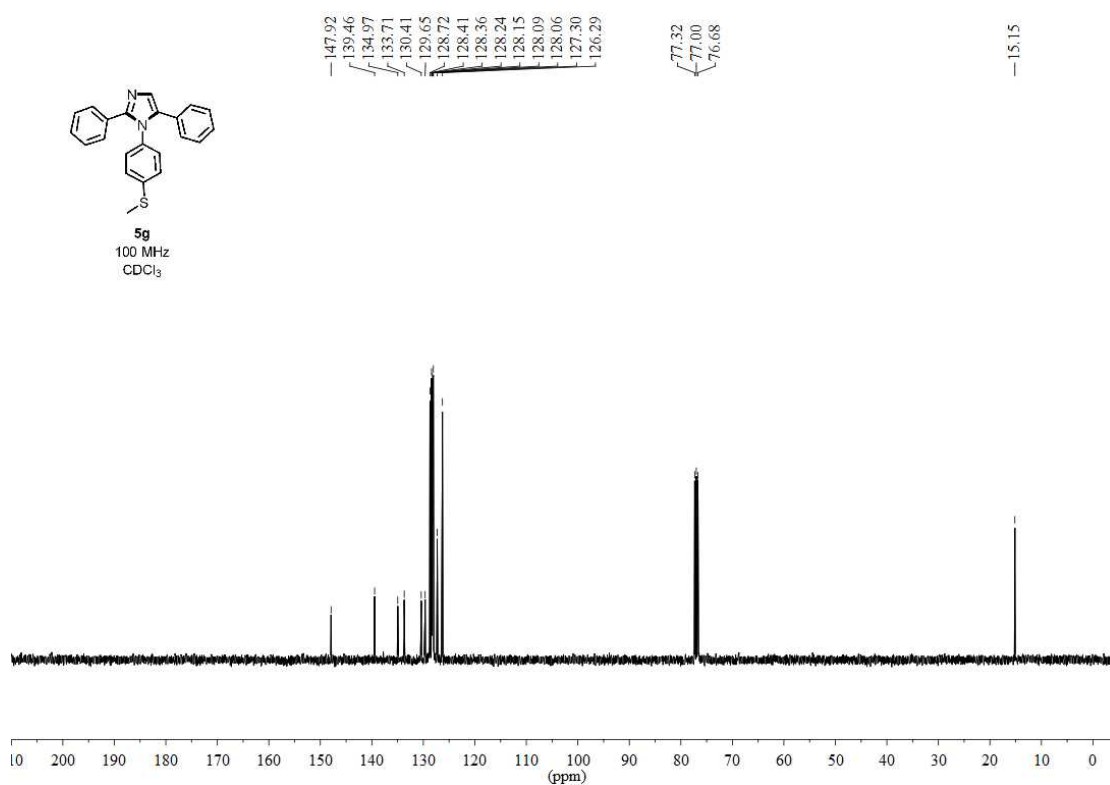

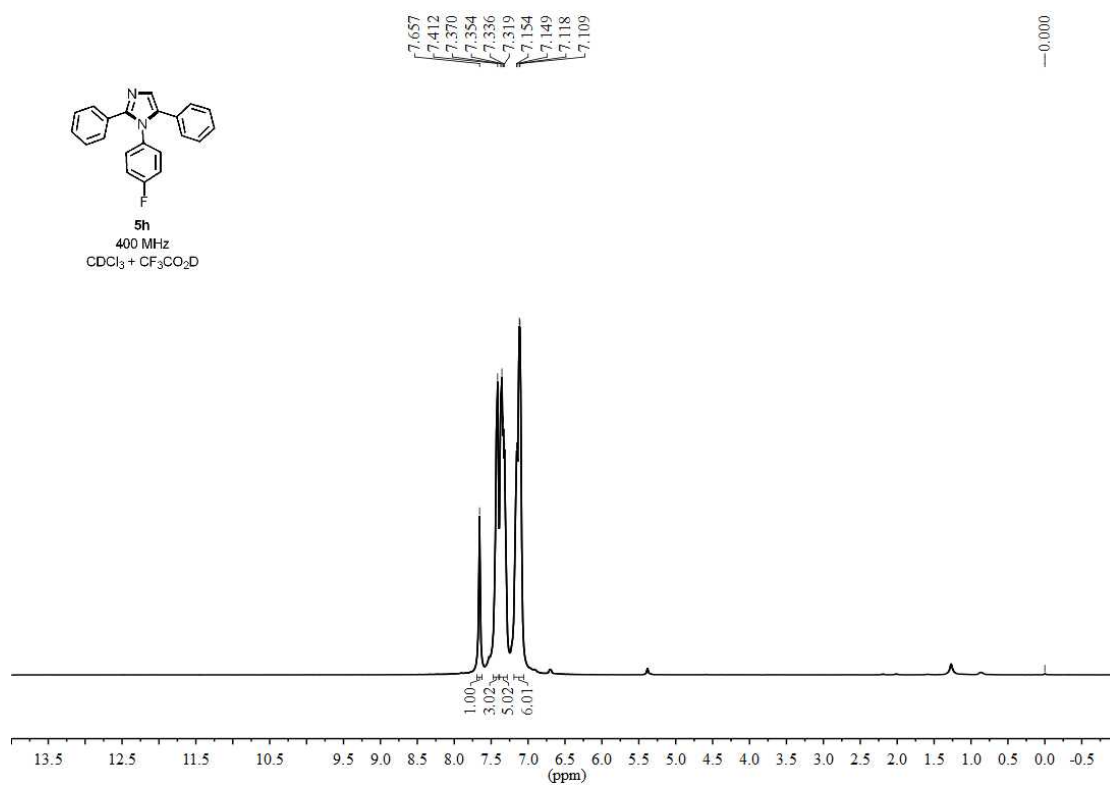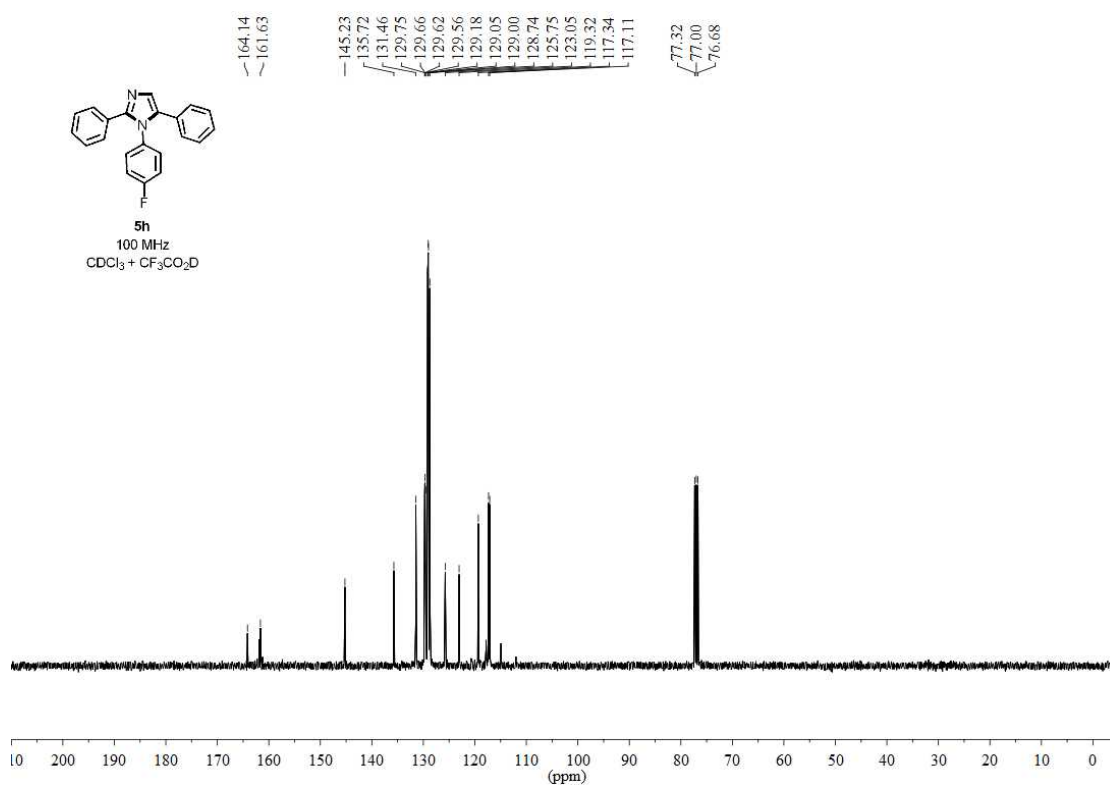

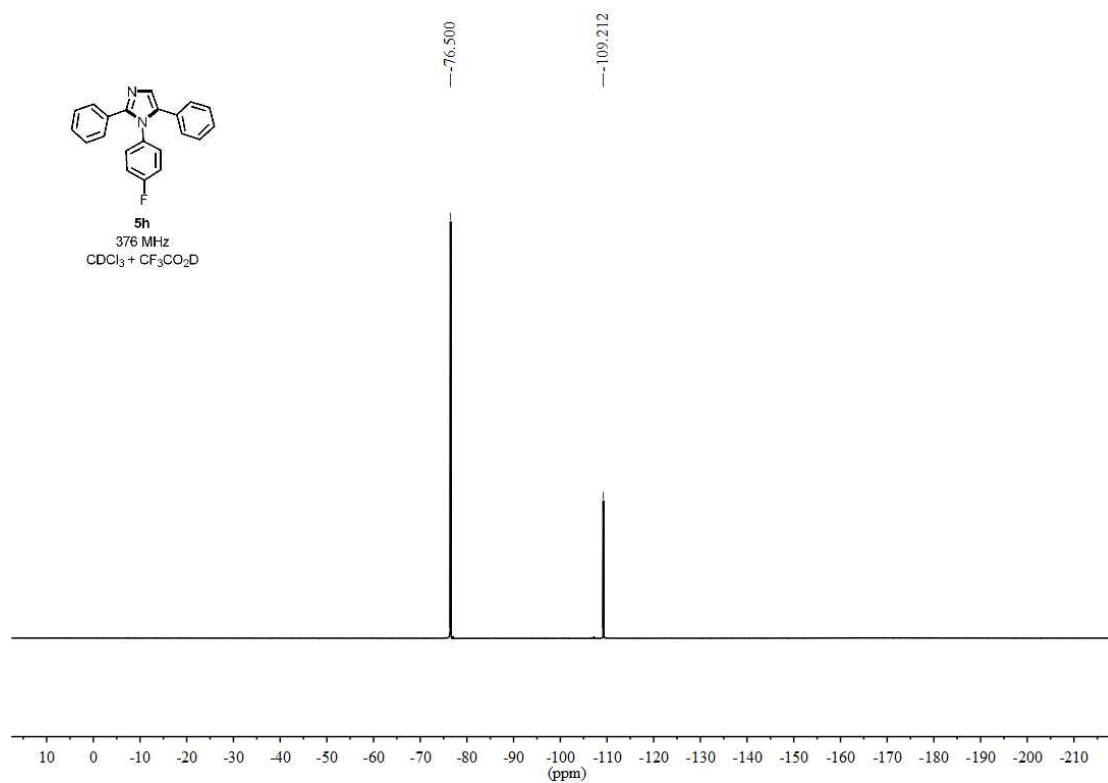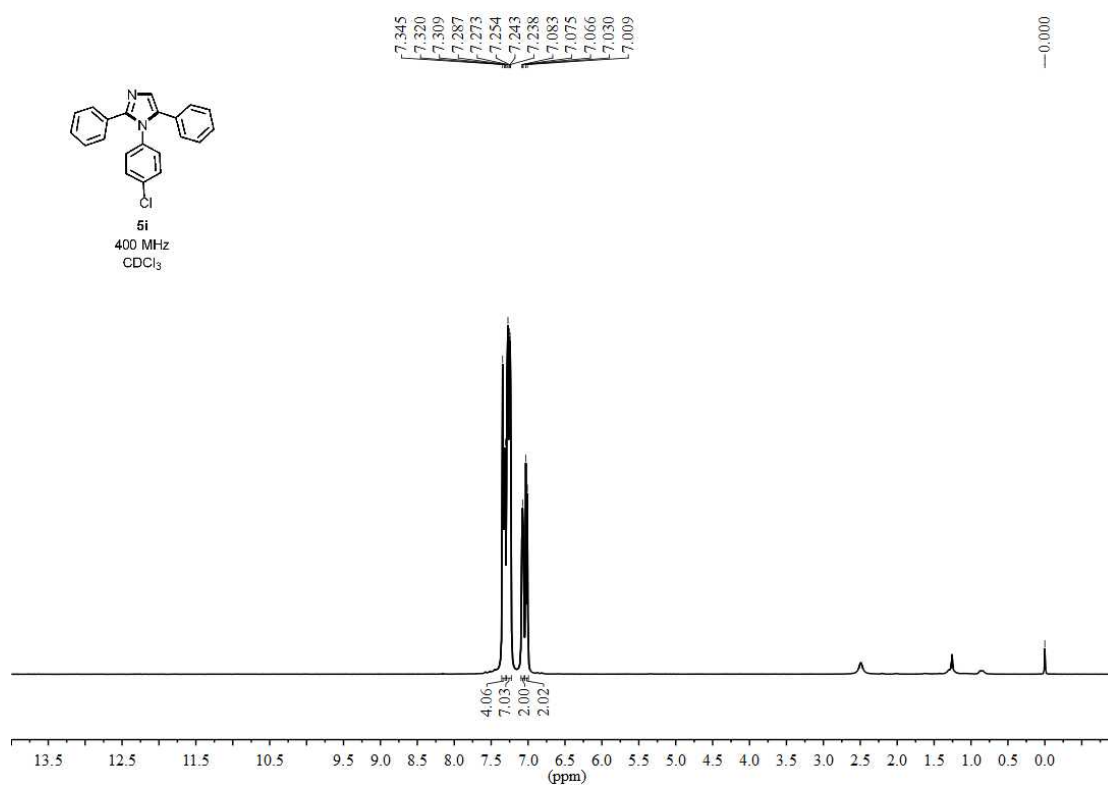

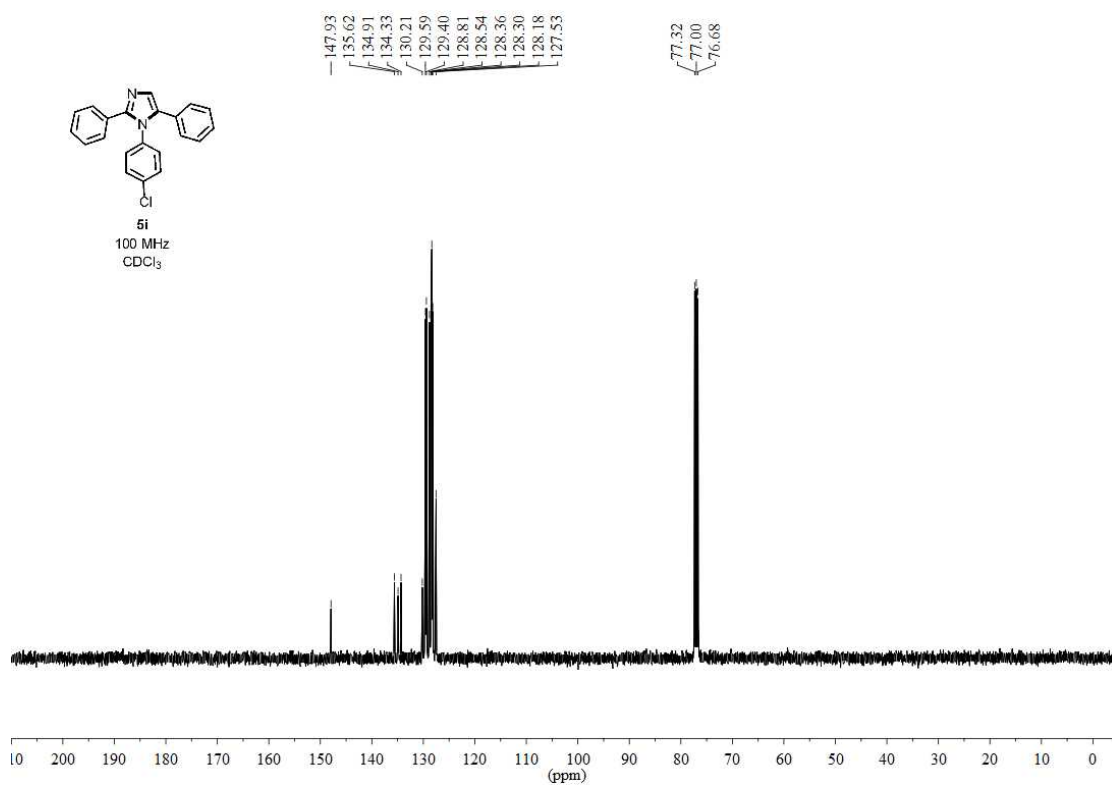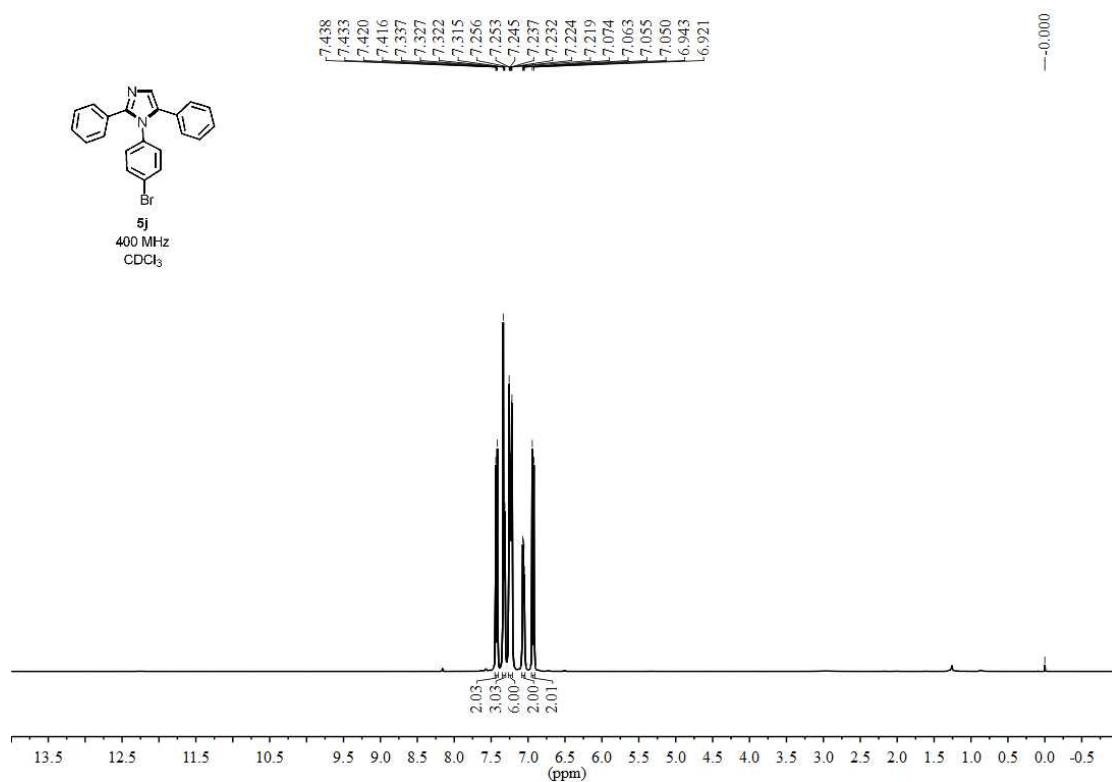

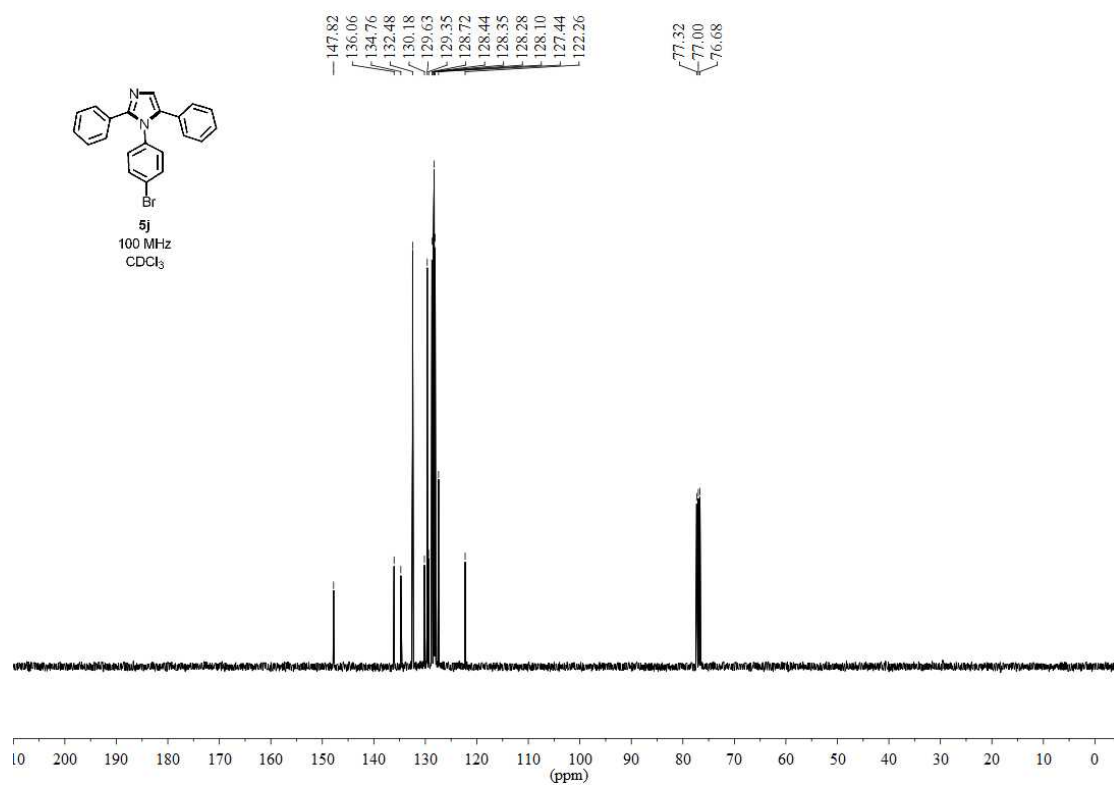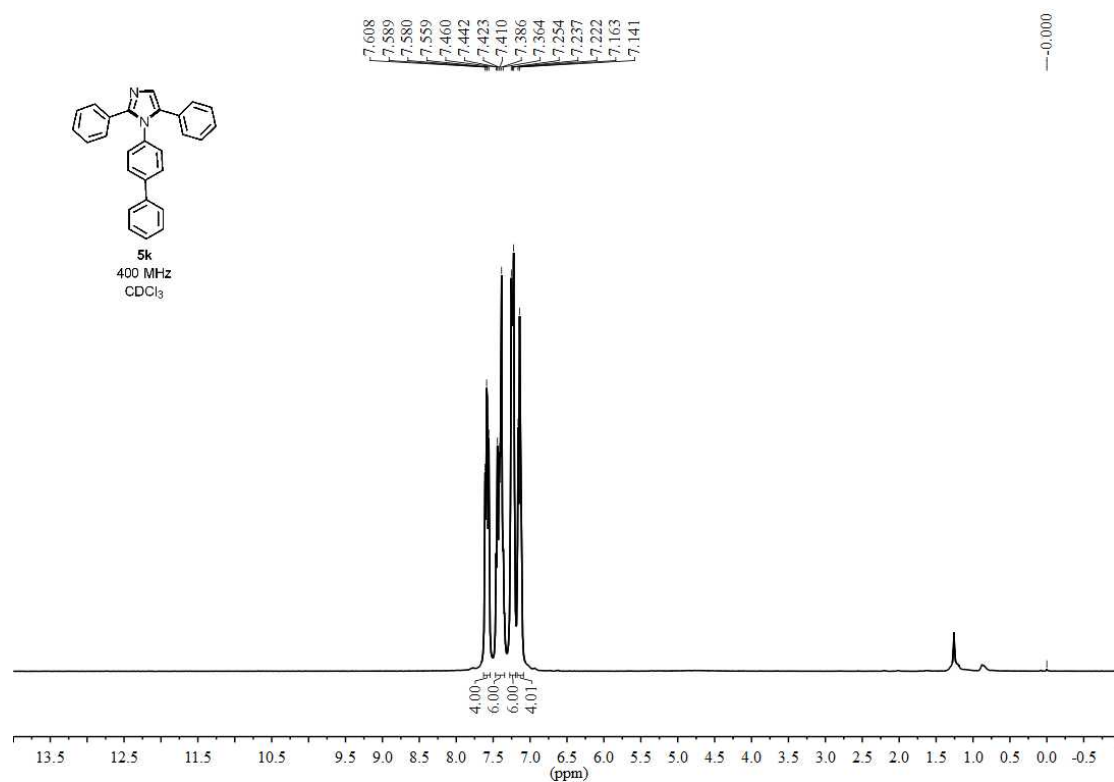

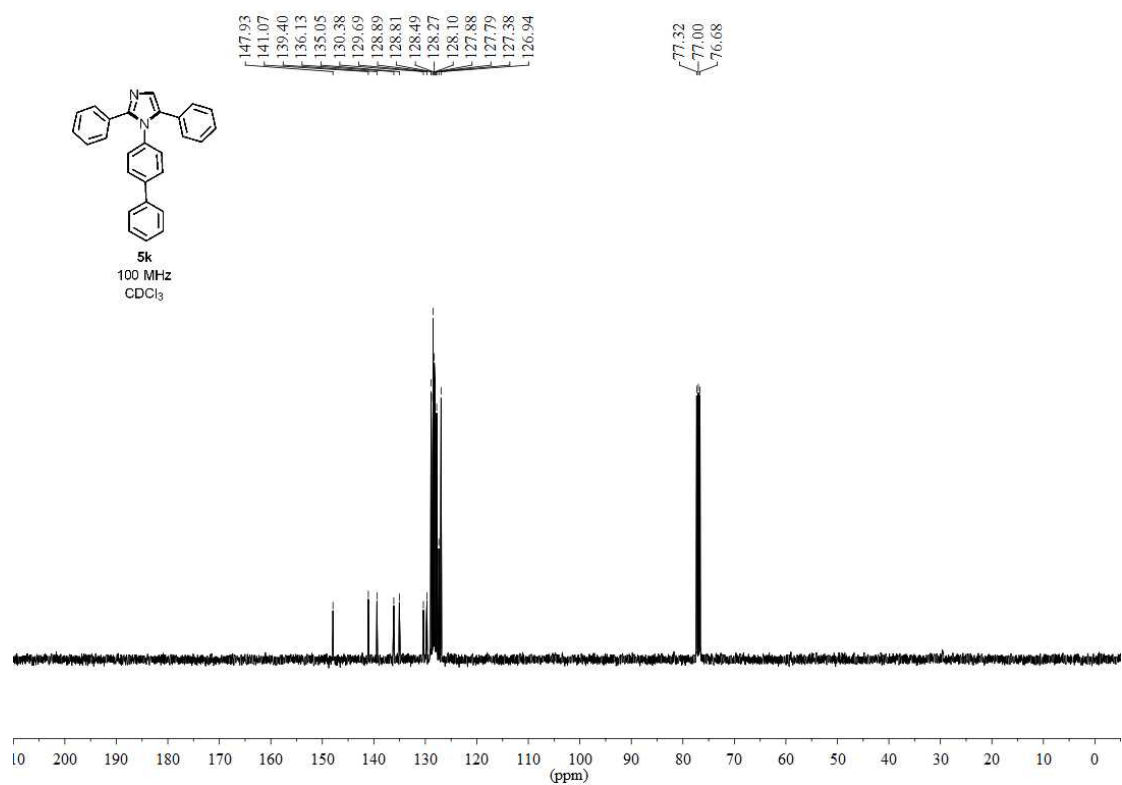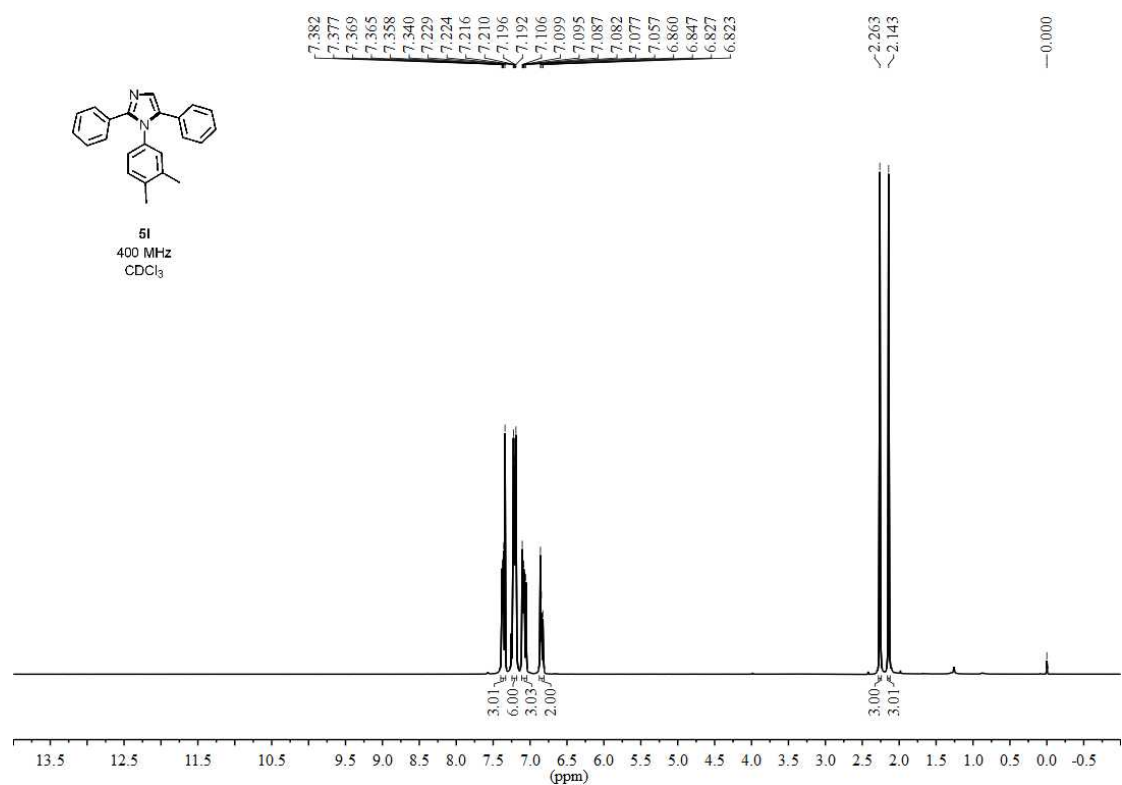

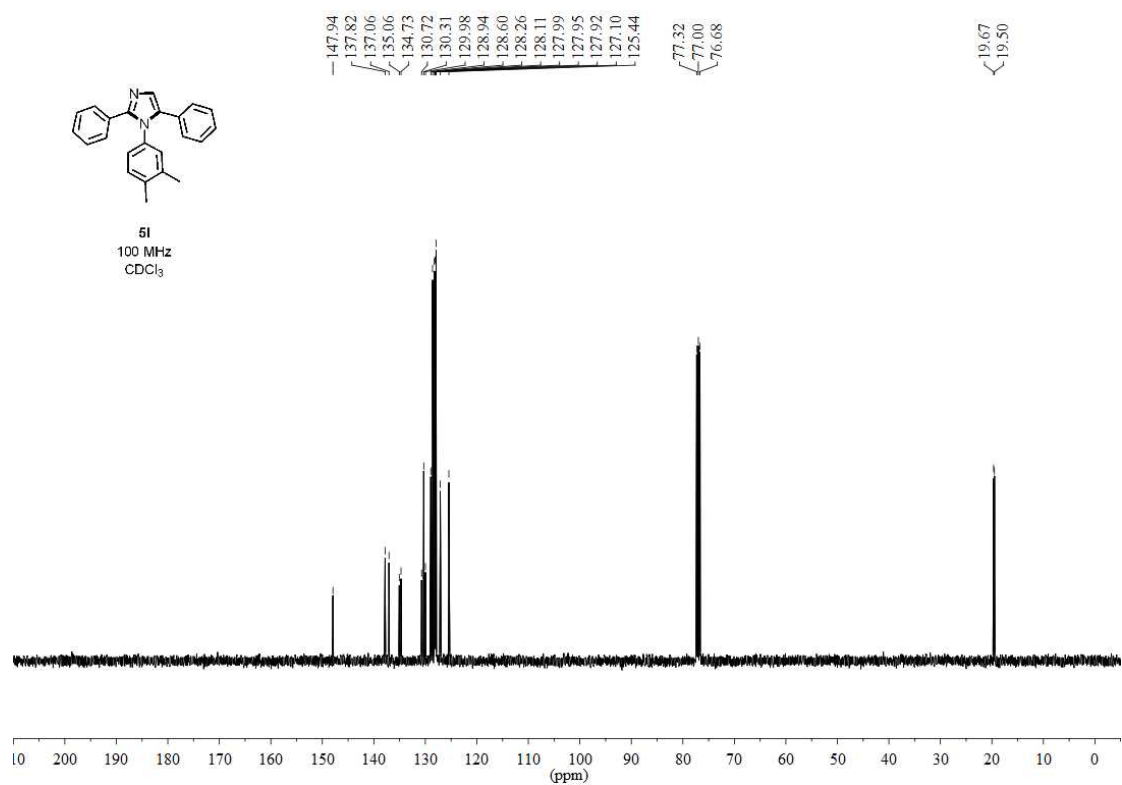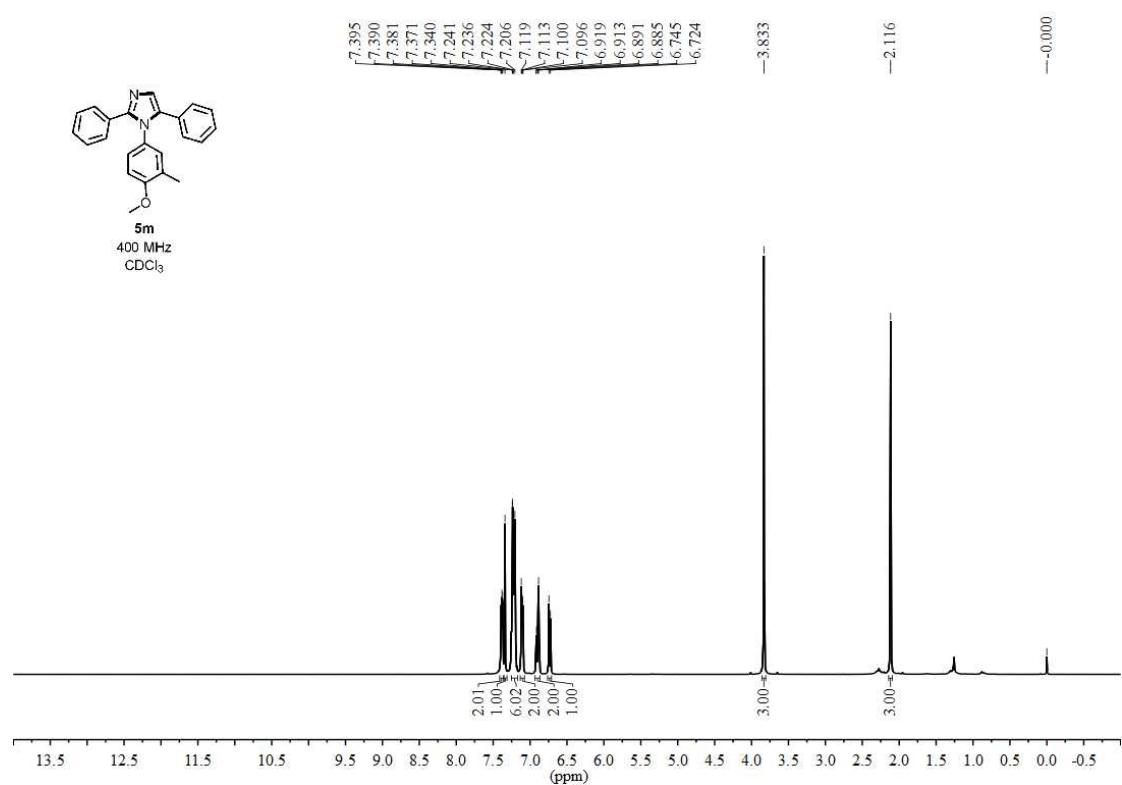

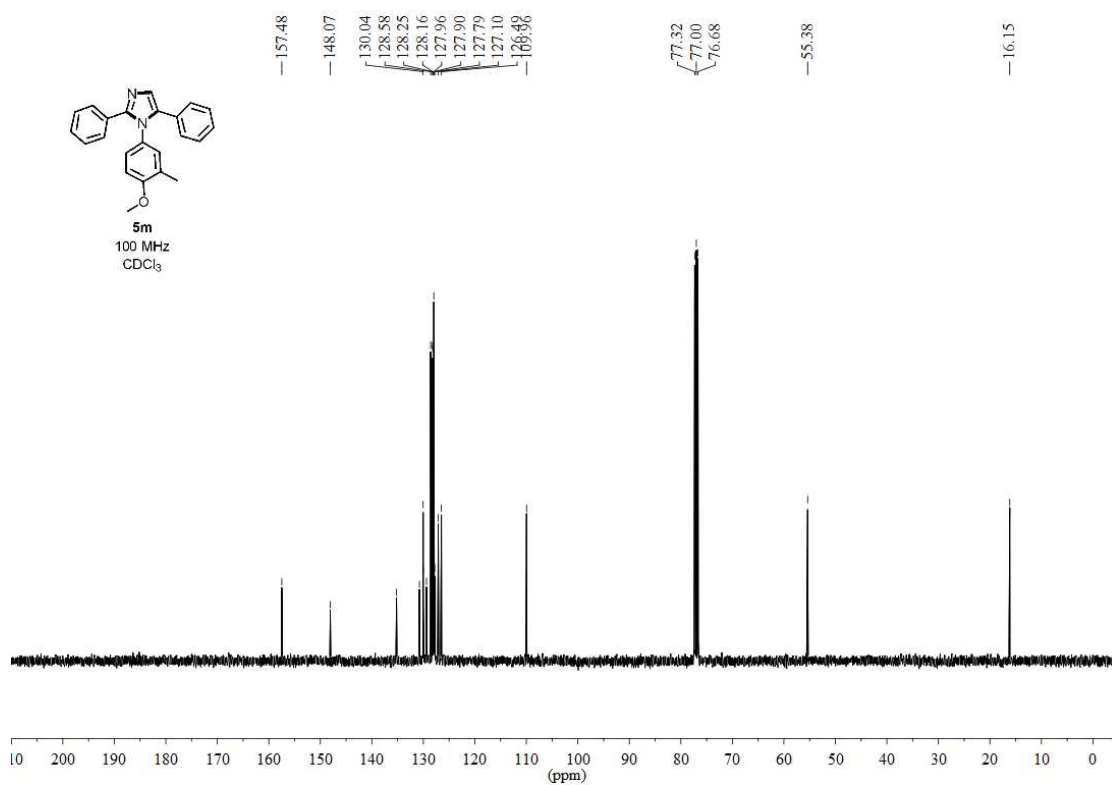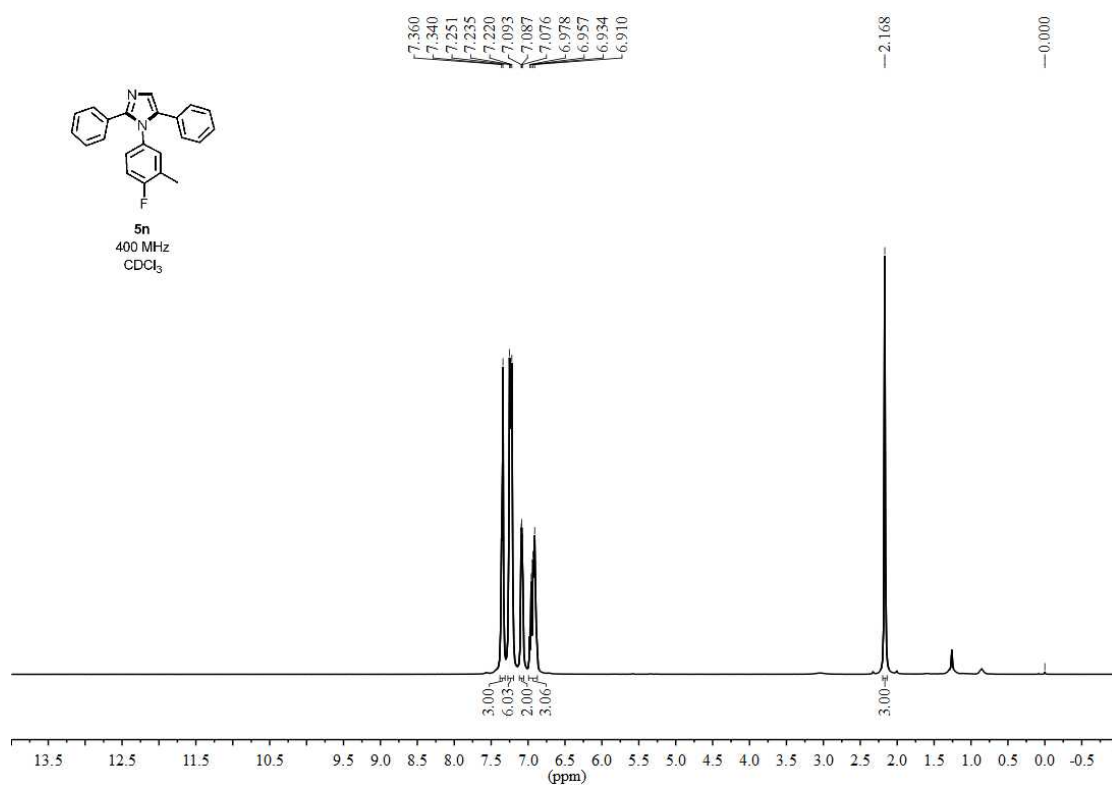

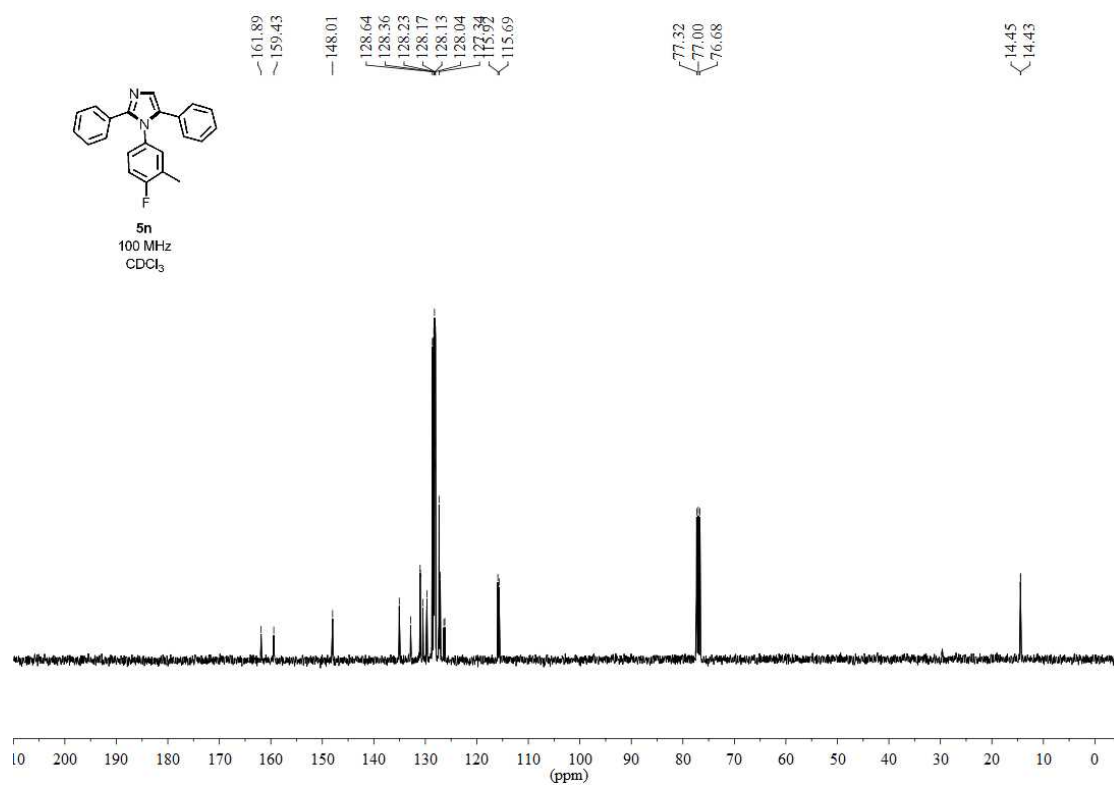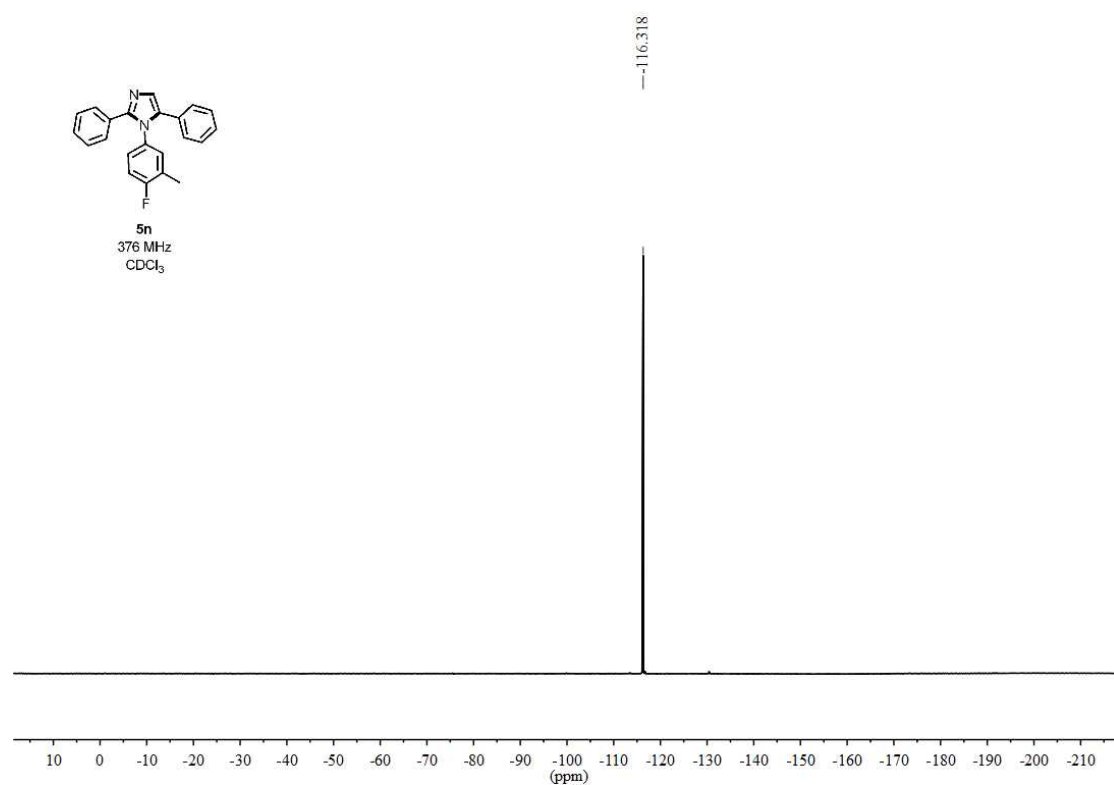

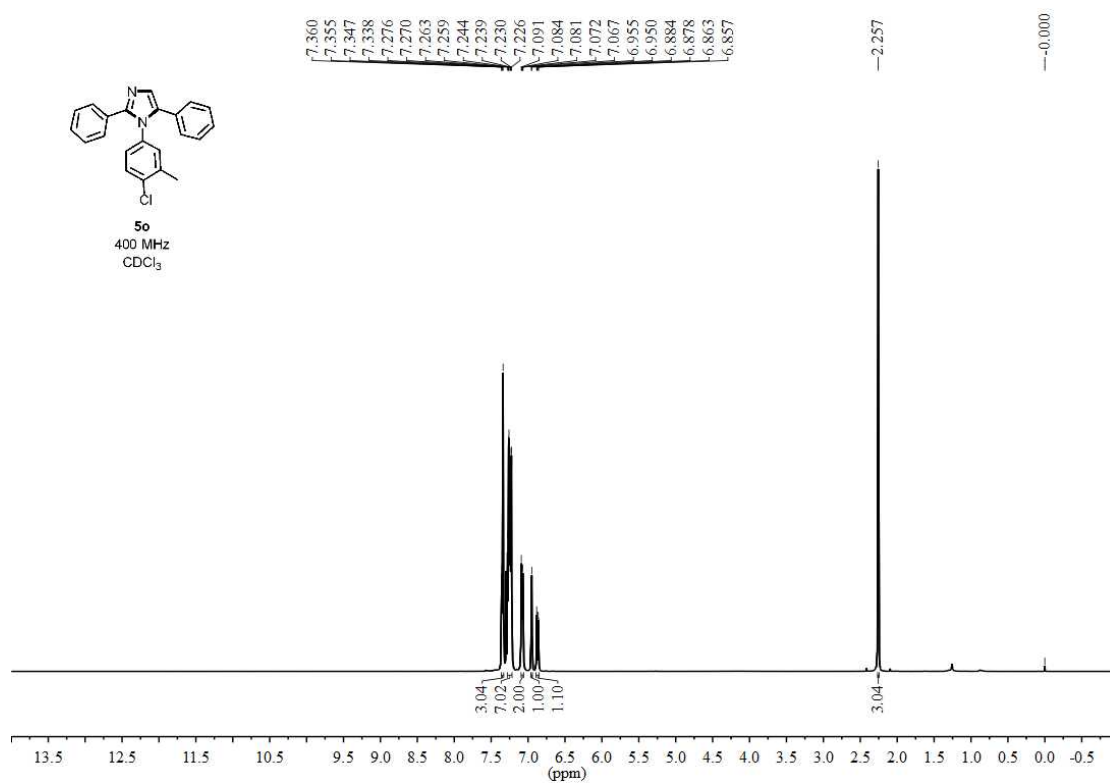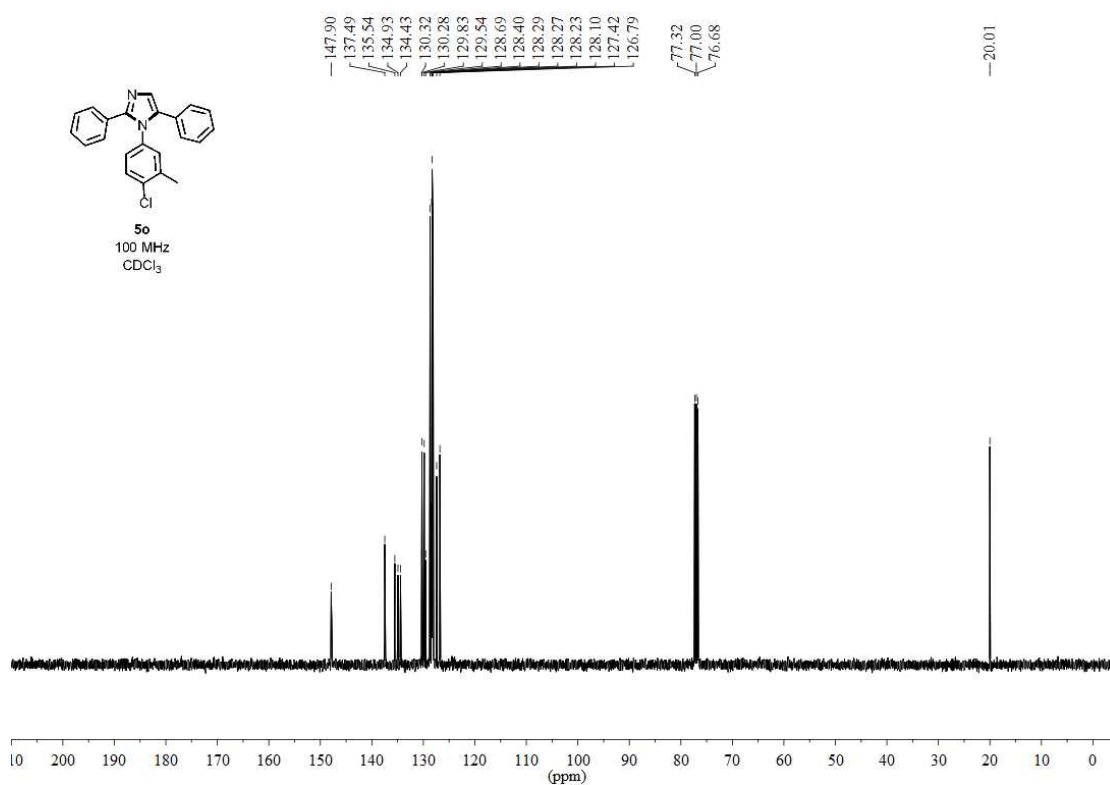

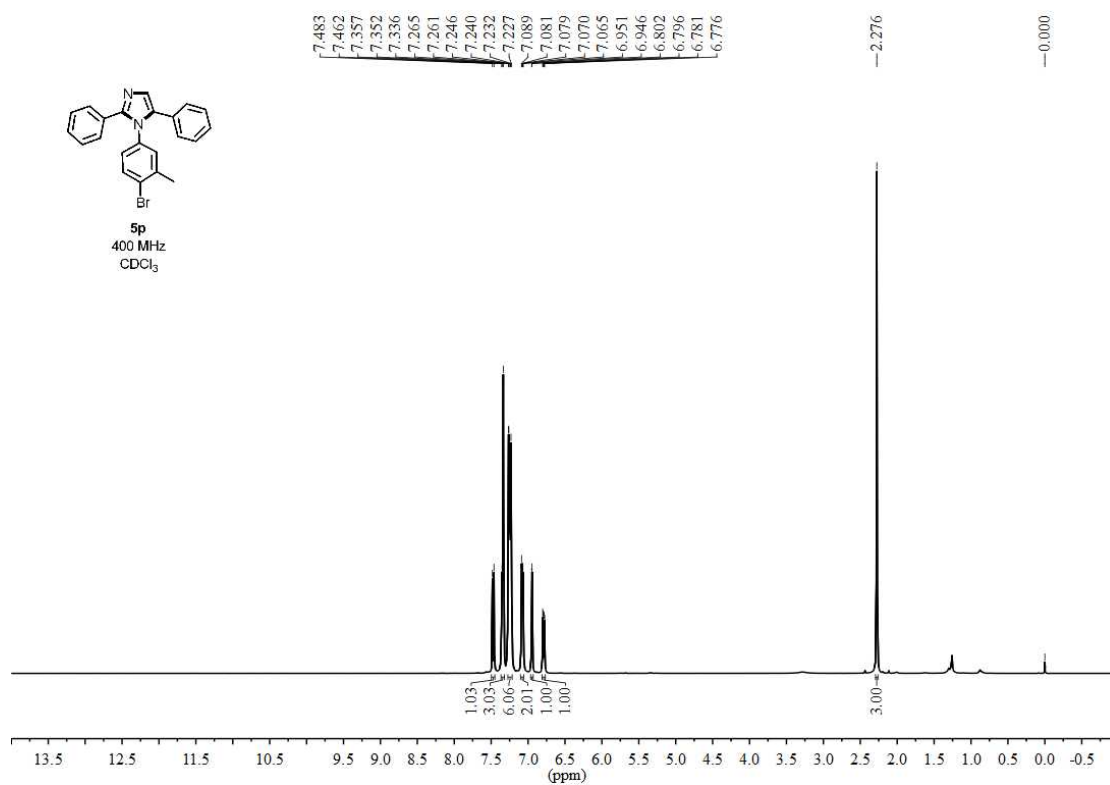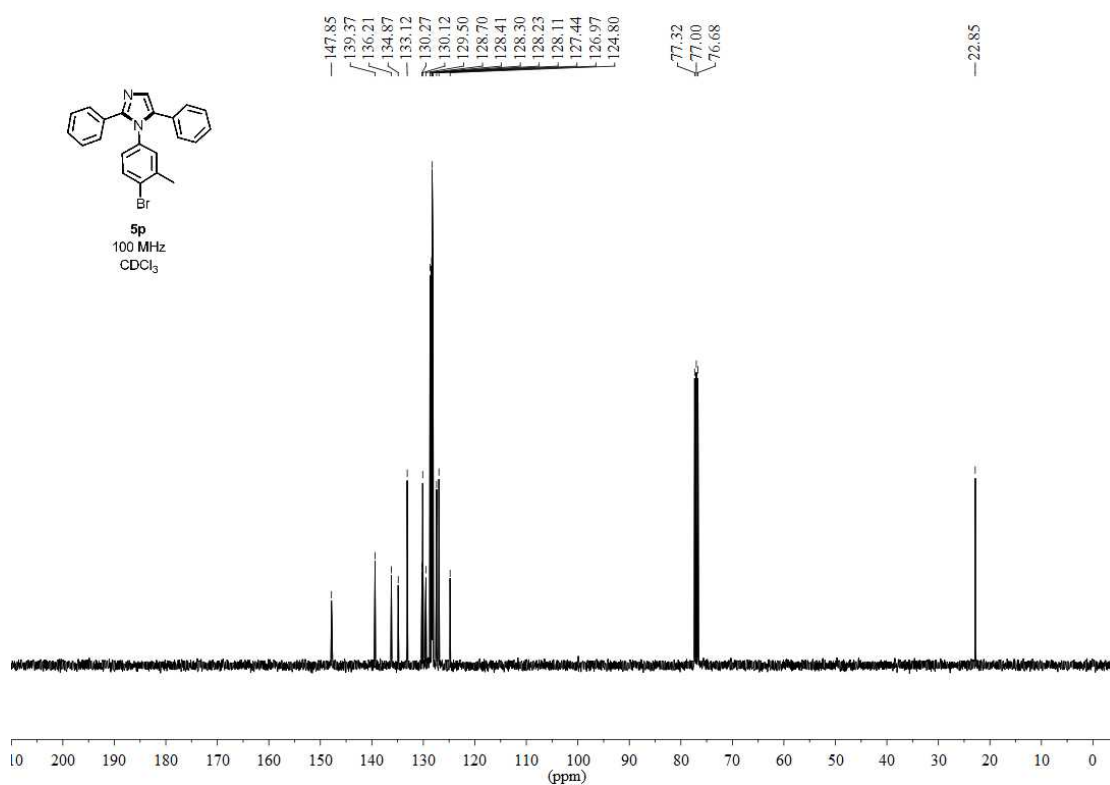

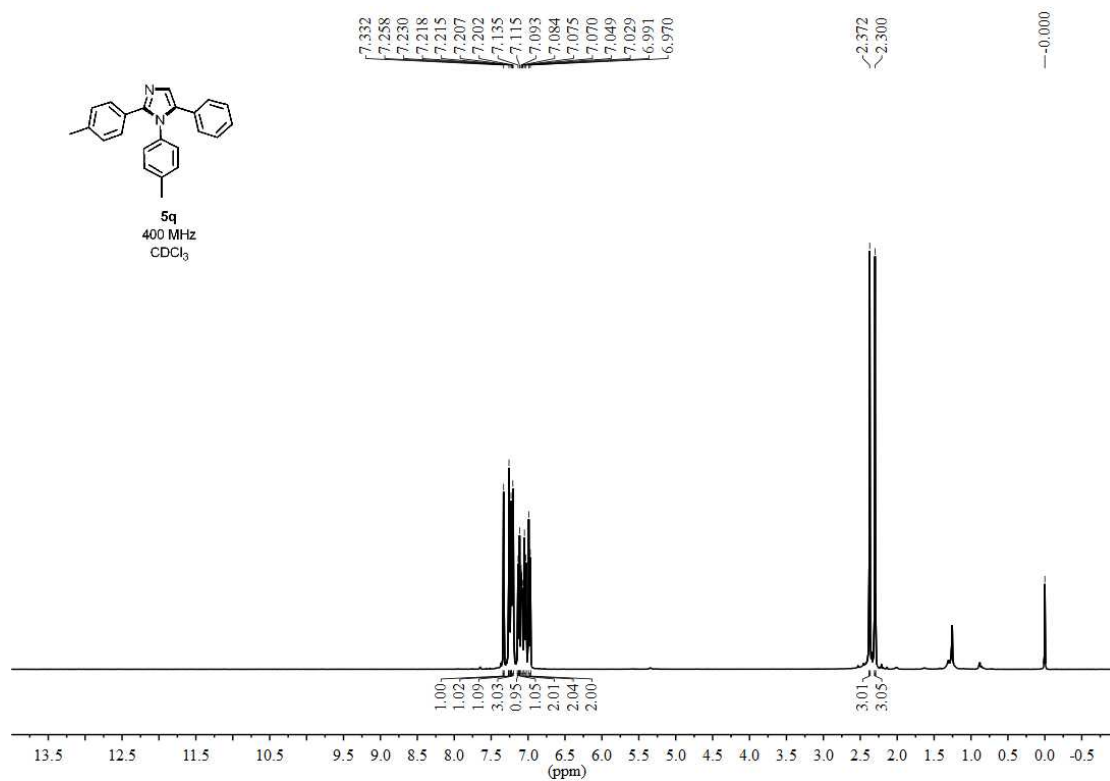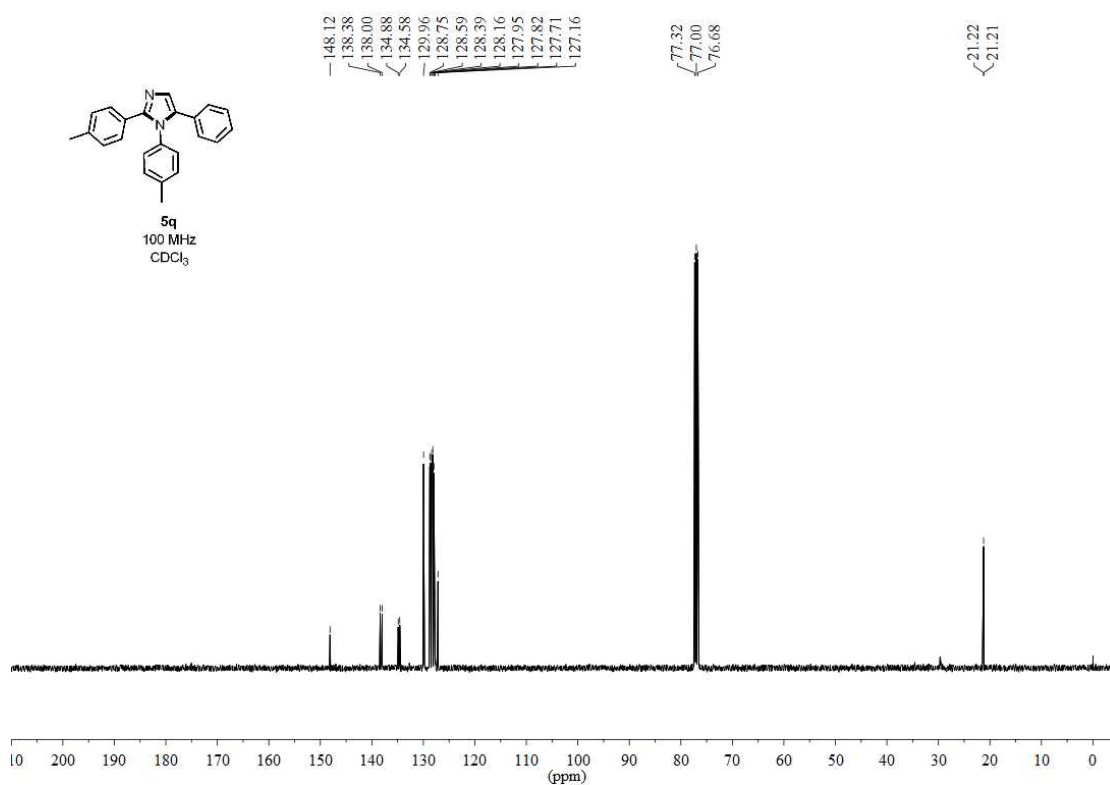

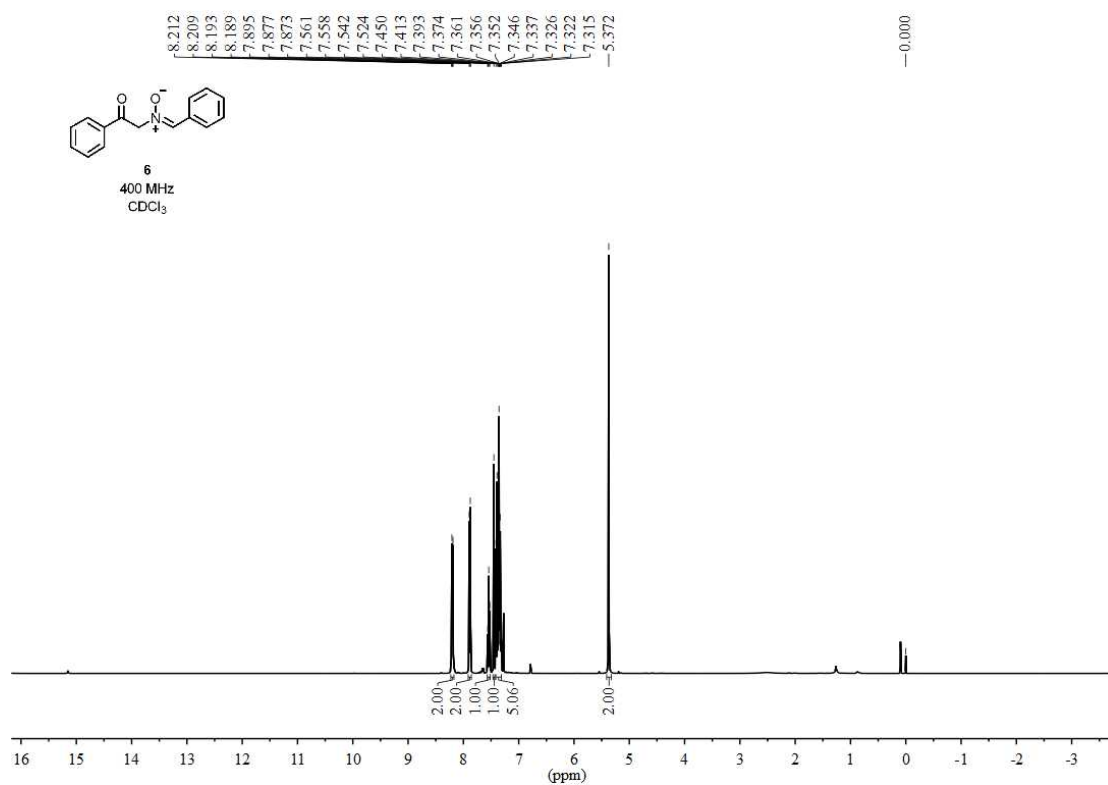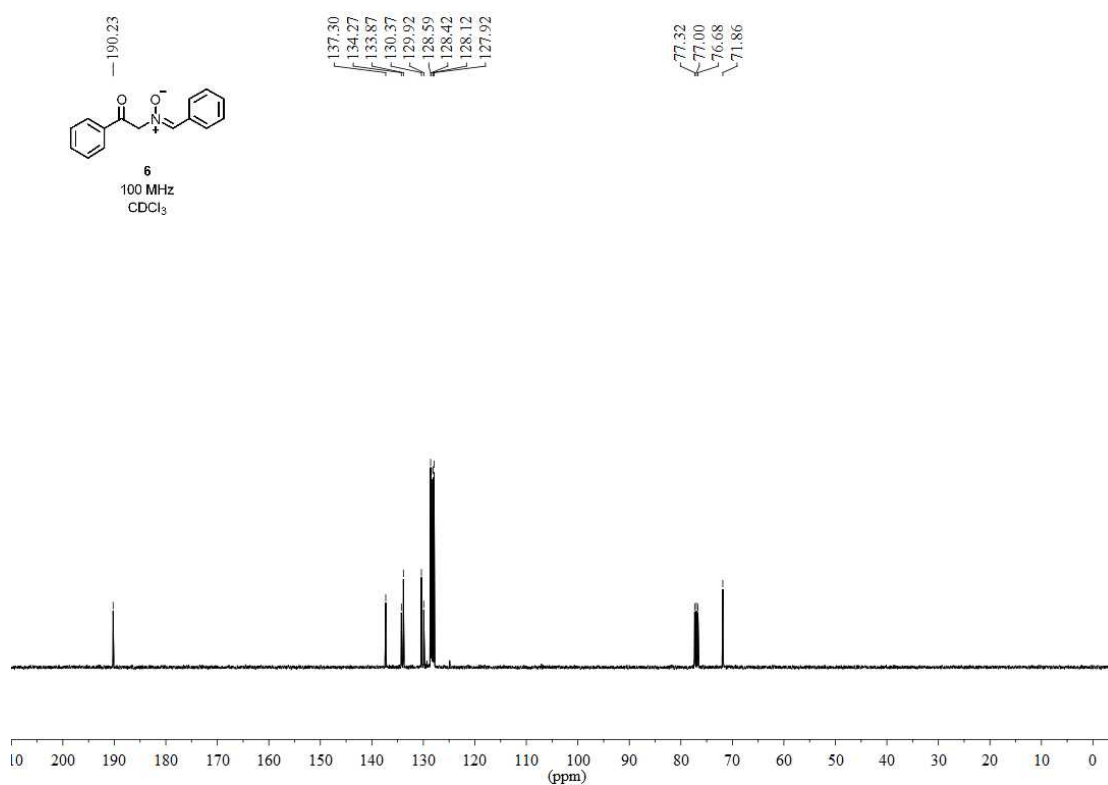

Supplement: d4cc02105c1.pdf [file d4cc02105c1.pdf]
